# Supplementary material for: Ruthenium-catalysed α-prenylation of ketones using prenol
Source: Royal Society of Chemistry journal article supplement (doi:10.1039/d2ob01882a), 2022-11-14
Supplement: d2ob01882a1.pdf [file d2ob01882a1.pdf]

## Supporting Information

### Ruthenium-catalyzed $\alpha$ -prenylation of ketones using prenol

Raman Vijaya Sankar, Deepsagar Manikpuri and Chidambaram Gunanathan\*

School of Chemical Sciences, National Institute of Science Education and Research (NISER), An OCC of Homi Bhabha National Institute, Bhubaneswar-752050, India.

\*To whom the correspondence should be addressed. E-mail: [gunanathan@niser.ac.in](mailto:gunanathan@niser.ac.in)

Index

|                                                                                                                    |     |
|--------------------------------------------------------------------------------------------------------------------|-----|
| General experimental.....                                                                                          | S2  |
| General optimization procedure for $\alpha$ -prenylation of cyclic ketones using prenols.....                      | S3  |
| General procedure for the $\alpha$ -prenylation of cyclic ketones using prenols.....                               | S4  |
| General procedure for the $\alpha$ -prenylation of simple acetophenone derivatives using prenols.....              | S5  |
| Experimental procedure for the gram-scale synthesis.....                                                           | S6  |
| Mechanistic studies .....                                                                                          | S6  |
| Spectral data of the $\alpha$ -prenylated products.....                                                            | S7  |
| Spectral data of functionalized compounds prepared from $\alpha$ -prenylated ketones .....                         | S23 |
| $^1\text{H}$ and $^{13}\text{C}$ NMR spectra of the $\alpha$ -prenylated products .....                            | S25 |
| $^1\text{H}$ & $^{13}\text{C}$ spectra of functionalized compounds prepared from $\alpha$ -prenylated ketones..... | S64 |
| References.....                                                                                                    | S68 |

**General Experimental:** All catalytic reactions were performed under inert atmosphere using standard Schlenk techniques. All stoichiometric reactions were performed in nitrogen atmosphere MBRAUN glove box. Ru-Macho [Carbonylchlorohydrido{bis[2-(diphenylphosphinomethyl)ethyl]amino}ethyl]amino}ruthenium(II)] (**1**) was purchased from Sigma-Aldrich and stored inside glove box. Chemicals (ketones and Prenol) were purchased from Acros, Sigma-Aldrich, Alfa-aesar, Himedia Chemicals and used without further purification. Dry solvents were prepared according to standard procedures. Infrared (IR) spectra were recorded in Perkin-Elmer FT-IR and Thermo-Nicolet FT-IR spectrophotometers. High-resolution mass spectra (HRMS) were obtained on Bruker micrOTOF-Q II Spectrometer and are reported as  $m/z$  (relative intensity). Accurate masses are reported for the molecular ion  $[M+Na]^+$ ,  $[M+H]^+$ ,  $[M]^+$ . Nuclear magnetic resonance spectra ( $^1H$  NMR and  $^{13}C$  NMR) were recorded at Bruker AV-700 ( $^1H$  at 700 MHz,  $^{13}C$  at 175 MHz) and Bruker AV-400 ( $^1H$  at 400 MHz,  $^{13}C$  at 100.6 MHz).  $^1H$  NMR chemical shifts are referenced in parts per million (ppm) with respect to tetramethyl silane (TMS,  $\delta$  0.00 ppm) and  $^{13}C$   $\{^1H\}$  NMR chemical shifts are referenced in parts per million (ppm) with respect to  $CDCl_3$  ( $\delta$  77.160 ppm). Coupling constants are reported in Hertz (Hz).  $^1H$  NMR spectroscopy abbreviations: s, Singlet; d, doublet; t, triplet; q, quartet; dd, doublet of doublets; dt, doublet of triplets; dq, doublet of quartets; td, triplet of doublets; qd, quartets of doublets; ddd, doublets of doublets of doublets; m, multiplet; br, broad. Assignment of spectra was done based on one-dimensional (dept-135) NMR techniques.

**GC Method:** Gas chromatography data were obtained using a gas chromatograph equipped with a SH-Rtx-1 capillary column (30 m  $\times$  250  $\mu$ m). The instrument was set to an injection volume of 1  $\mu$ L, an inlet split ratio of 10:1, and inlet and detector temperatures of 300 and 330  $^{\circ}C$ , respectively. The temperature program used for all of the analyses is as follows: 50  $^{\circ}C$ , 1

min; 12 °C/min to 320 °C, 7 min. Response factor for all of the necessary compounds with respect to standard mesitylene was calculated from the average of three independent GC runs.

### **General optimization procedure for $\alpha$ -prenylation of cyclic ketones using prenols:**

A Schlenk flask (25 mL) was equipped with a stir bar, catalyst **1** (0.005 mmol), base (0.20-0.25 mmol) tetralone (0.5 mmol), prenol (0.75-1 mmol), and toluene (1.5 mL) under nitrogen atmosphere in a glove box. The flask was taken out of the glove box, equipped with a condenser and the solution was heated at 100 °C (oil bath temperature) with stirring in an open system under a flow of nitrogen for 12 h. The completion of the reaction was monitored using GC analysis. After cooling to room temperature, 0.5 mmol of internal standard (mesitylene) was added into the reaction mixture and the conversion of tetralone was calculated using GC analysis. Further the solvent was evaporated, and the reaction was quenched using water (0.5 mL), and extracted by dichloromethane (3  $\times$  3 mL). The combined organic layers were dried over anhydrous Na<sub>2</sub>SO<sub>4</sub>, filtered, and concentrated. The resulted residue was purified by column chromatography over silica gel (100–200 mesh) using hexane/ethyl acetate mixture as eluent. Yields were calculated for isolated pure products.

Initial investigation for catalytic prenylation was tested using tetralone (0.5 mmol) with prenol (3-methyl 2-buten-1-ol, 1 mmol), Ru-Macho catalyst (1 mol %), and KO<sup>t</sup>Bu (20 mol %) in toluene and the reaction mixture heated at 80 °C for 16 h under nitrogen atmosphere, which resulted in the formation of the desired prenylated ketone product **2a** in 37% and a homoallylic alcohol **2a'** in 10% yield (entry 1, Table S1). Reaction performed with increased base KO<sup>t</sup>Bu (30 mol %) provided the product **2a** in 54% yield (entry 2, Table S1). When the reaction was performed using 50 mol % base for 12 h, an increase in the formation of product **2a** (79%) was observed (entry 3, Table S1). Next, increasing the reaction temperature to 100 °C resulted in optimal conditions from which 95% yield of **2a** with a minor amount (3%) of **2a'** was obtained.

From this condition, further experiments using decreased amounts of base (30 mol %) and prenol (1.5 equiv.) delivered the products in diminished yields (entries 5,6, Table S1). Employing the milder bases such as  $K_2CO_3$  and  $Cs_2CO_3$  failed to provide the desired reaction (entry 7,8, Table S1). Control experiment carried out without using a catalyst and base KO<sup>t</sup>Bu (50 mol %) alone resulted in an unidentified complex reaction mixture (entry 9, Table S1).

**Table S1. Optimization of reaction condition for  $\alpha$ -Prenylation of tetralone<sup>a</sup>**

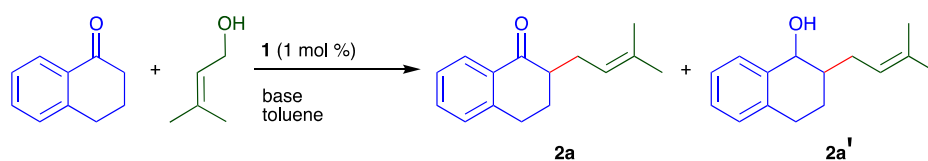

| <sup>a</sup> Reaction condition:<br>tetralone (0.5 mmol, 1 equiv), | entry          | base (mol %)                 | temp (°C)  | time (h) | <b>2a</b> (%) <sup>b</sup> | <b>2a'</b> (%) <sup>b</sup> |
|--------------------------------------------------------------------|----------------|------------------------------|------------|----------|----------------------------|-----------------------------|
|                                                                    | 1              | KO <sup>t</sup> Bu (20)      | 80         | 16       | 37                         | 10                          |
|                                                                    | 2              | KO <sup>t</sup> Bu (30)      | 80         | 16       | 54                         | 10                          |
|                                                                    | 3              | KO <sup>t</sup> Bu (50)      | 80         | 12       | 79                         | 12                          |
|                                                                    | <b>4</b>       | <b>KO<sup>t</sup>Bu (50)</b> | <b>100</b> | 12       | <b>95</b>                  | <b>3</b>                    |
|                                                                    | 5              | KO <sup>t</sup> Bu (30)      | 100        | 12       | 88                         | 6                           |
|                                                                    | 6 <sup>c</sup> | KO <sup>t</sup> Bu (30)      | 100        | 12       | 72                         | 16                          |
|                                                                    | 7              | $Cs_2CO_3$ (30)              | 100        | 12       | -                          | -                           |
|                                                                    | 8              | $K_2CO_3$ (50)               | 100        | 12       | -                          | -                           |
|                                                                    | 9              | KO <sup>t</sup> Bu (50)      | 100        | 12       | -                          | -                           |

prenol (1 mmol, 2 equiv), toluene (2 mL), catalyst 1, and base were heated at an indicated temperature under nitrogen flow. <sup>b</sup>Yields were calculated for pure isolated products after column chromatography. <sup>c</sup>Prenol (0.75 mmol, 1.5 equiv) was used.

#### General procedure for the $\alpha$ -prenylation of cyclic ketones using prenol:

A Schlenk flask (25 mL) was equipped with a stir bar, catalyst **1** (0.005 mmol, 1 mol %), KO<sup>t</sup>Bu (0.25 mmol, 50 mol %), tetralone (0.5 mmol), prenol (1 mmol), and toluene (1.5 mL) were added under nitrogen atmosphere in a glove box. The flask was taken out of the glove box, equipped with a condenser and the solution was heated at 100 °C (oil bath temperature) with stirring in an open system under a flow of nitrogen for 12 h. The completion of the reaction

was monitored using GC analysis. Upon completion, reaction mixture was cooled to room temperature, 0.5 mmol of internal standard (mesitylene) was added into the reaction mixture and the conversion of cyclic ketones was calculated using GC analysis. Further, the solvent was evaporated the reaction was quenched using water (0.5 mL), and extracted by dichloromethane (3 × 3 mL). The combined organic layers were dried over anhydrous Na<sub>2</sub>SO<sub>4</sub>, filtered, and concentrated. The resulted residue was purified by column chromatography over silica gel (100–200 mesh) using hexane/ethyl acetate mixture as eluent. Yields were calculated for isolated pure products.

#### **General procedure for $\alpha$ -prenylation of simple acetophenone derivatives using prenoI:**

A Schlenk flask (25 mL) was equipped with a stir bar, catalyst **1** (0.0025 mmol, 0.5 mol %), NaO<sup>t</sup>Bu (0.25 mmol, 50 mol %), acetophenone derivatives (0.5 mmol), prenoI (1 mmol), and toluene (1.5 mL) were added under nitrogen atmosphere in a glove box. The flask was taken out of the glove box, equipped with a condenser and the solution was refluxed at 125 °C (oil bath temperature) with stirring in an open system under a flow of nitrogen for 8 h. The completion of the reaction was monitored using GC analysis. Upon completion, reaction mixture was cooled to room temperature, 0.5 mmol of internal standard (mesitylene) was added into the reaction mixture and the conversion of acetophenone was calculated using GC analysis. Further, the solvent was evaporated and the reaction was quenched by water (0.5 mL) and extracted with dichloromethane (3 × 3 mL). The combined organic layers were dried over anhydrous Na<sub>2</sub>SO<sub>4</sub>, filtered, and concentrated. The resulted residue was purified by column chromatography over silica gel (100–200 mesh) using hexane/ethyl acetate mixture as eluent. Yields were calculated for isolated pure products.

#### **Experimental procedure for gram-scale synthesis:**

A Schlenk flask (50 mL) was equipped with a stir bar, catalyst **1** (0.08 mmol, 1 mol %, 48 mg), KO<sup>t</sup>Bu (4 mmol, 50 mol %, 448 mg), tetralone (8 mmol, 1.06 g), prenol (16 mmol, 1.62 g), and toluene (20 ml) were added under nitrogen atmosphere in a glove box. The flask was taken out of the glove box, equipped with a condenser and the solution was heated at 100 °C (oil bath temperature) with stirring in an open system under a flow of nitrogen for 12 h. Upon completion, reaction mixture was cooled to room temperature. Further, the solvent was evaporated the reaction was quenched using water (5 mL), and extracted by dichloromethane (10 × 5 mL). The combined organic layer was dried over anhydrous Na<sub>2</sub>SO<sub>4</sub>, filtered, and concentrated. The resulted residue was purified by column chromatography over silica gel (100–200 mesh) using hexane/ethyl acetate mixture as eluent. Yield was calculated for isolated pure products.

### **Mechanistic studies**

#### **General procedure for control experiment of tetralone with 3-methyl-2-butanal:**

A Schlenk flask (25 mL) was equipped with a stir bar, catalyst **1** (0.005 mmol, 1 mol %), KO<sup>t</sup>Bu (0.25 mmol, 50 mol %), Tetralone (0.5 mmol), 3-methyl-2-butanal (1 mmol) and toluene (1.5 mL) were added under nitrogen atmosphere in a glove box. The flask was taken out of the glove box, equipped with a condenser and the solution was heated at 100 °C (oil bath temperature) with stirring in an open system under a flow of nitrogen for 12 h. The completion of the reaction was monitored using GC analysis. After cooling to room temperature, 0.5 mmol of internal standard (mesitylene) was added into the reaction mixture and the conversion of tetralone was calculated using GC analysis. Further, the solvent was evaporated the reaction was quenched with water (0.5 mL) and extracted with dichloromethane (3 x 3 mL). The combined organic layers were dried over Na<sub>2</sub>SO<sub>4</sub>, filtered, and concentrated. The residue was

purified by column chromatography over silica gel (100–200 mesh) with hexane/ethyl acetate mixture as eluent. Yields were calculated for isolated pure products.

### Spectral data of the $\alpha$ -prenylated products:

**2-(3-Methylbut-2-en-1-yl)-3,4-dihydronaphthalen-1(2H)-one (2a):** Purified by silica-gel

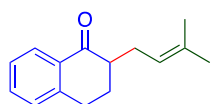

column chromatography using ethyl acetate/hexane (1:99) mixture as eluent. Colorless liquid. Yield: 102 mg, 95%. IR (DCM): 2927, 1688, 1600,

1455, 1220, 1156, 933, 740  $\text{cm}^{-1}$ .  $^1\text{H}$  NMR (400 MHz,  $\text{CDCl}_3$ ):  $\delta$  8.06 (d,  $J = 7.8$  Hz, 1H, ArCH), 7.47 (t,  $J = 7.4$  Hz, 1H, ArCH), 7.33-7.24 (m, 2H, ArCH), 5.20 (t,  $J = 6.7$  Hz, 1H, Olefinic CH), 3.00 (t,  $J = 5.9$  Hz, 2H,  $\text{CH}_2$ ), 2.69-2.64 (m, 1H,  $\text{CH}_2$ ), 2.51 (ddd,  $J_1 = 11.4$  Hz,  $J_2 = 7.9$  Hz,  $J_3 = 4.0$  Hz, 1H,  $\text{CH}_2$ ), 2.30-2.19 (m, 2H,  $\text{CH}_2$ ), 1.93-1.85 (m, 1H, CH), 1.74 (s, 3H,  $\text{CH}_3$ ), 1.66 (s, 3H,  $\text{CH}_3$ ).  $^{13}\text{C}$   $\{^1\text{H}\}$  NMR (100.6 MHz,  $\text{CDCl}_3$ ):  $\delta$  200.0, 144.1, 133.5, 133.1, 132.6, 128.7, 127.4, 126.5, 121.8, 48.1, 28.7, 28.1, 28.0, 25.9, 17.9. HRMS (ESI)  $m/z$  calcd for  $\text{C}_{17}\text{H}_{22}\text{O}$  ( $\text{M}+\text{H}$ ) $^+$  : 215.1436, found: 215.1480.

### **5,7-Dimethyl-2-(3-methylbut-2-en-1-yl)-3,4-dihydronaphthalen-**

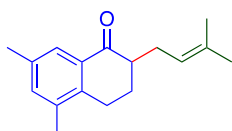

**1(2H)-one (2b):** Purified by silica-gel column chromatography using ethyl acetate/hexane (1:99) mixture as eluent. Colorless liquid. Yield: 69

mg, 57%. IR(DCM): 2924, 1683, 1611, 1451, 1377, 1287, 1157, 871  $\text{cm}^{-1}$ .  $^1\text{H}$  NMR (400 MHz,  $\text{CDCl}_3$ ):  $\delta$  7.72 (s, 1H, ArCH), 7.16 (s, 1H, ArCH), 5.18 (t,  $J = 6.8$  Hz, 1H, Olefinic CH), 2.89 (dt,  $J_1 = 17.2$  Hz,  $J_2 = 4.4$  Hz, 1H,  $\text{CH}_2$ ), 2.73 (ddd,  $J_1 = 16.5$  Hz,  $J_2 = 10.8$  Hz,  $J_3 = 5.0$  Hz, 1H,  $\text{CH}_2$ ), 2.63-2.59 (m, 1H,  $\text{CH}_2$ ), 2.45 (ddd,  $J_1 = 11.7$  Hz,  $J_2 = 8.1$  Hz,  $J_3 = 4.0$  Hz, 1H,  $\text{CH}_2$ ), 2.29 (s,  $J = 23.8$  Hz, ( $2 \times 3 = 6\text{H}$ ), Ar $\text{CH}_3$ ), 2.20 (qd,  $J_1 = 9.2$  Hz,  $J_2 = 4.8$  Hz, 2H,  $\text{CH}_2$ ), 1.87-1.78 (m, 1H, CH), 1.72 (s, 3H,  $\text{CH}_3$ ), 1.63 (s, 3H,  $\text{CH}_3$ ).  $^{13}\text{C}$   $\{^1\text{H}\}$  NMR (100.6 MHz,  $\text{CDCl}_3$ ):  $\delta$  200.8, 139.6, 136.2, 135.7, 135.7, 133.5, 132.7, 125.4, 122.0, 47.5, 28.1, 27.5, 26.0,

25.3, 21.0, 19.4, 18.0. HRMS (ESI)  $m/z$  calcd for  $C_{17}H_{22}O$  ( $M+H$ )<sup>+</sup> : 265.1568, found: 265.1572.

**4-Methyl-2-(3-methylbut-2-en-1-yl)-3,4-dihydronaphthalen-1(2H)-one (2c):** Purified by

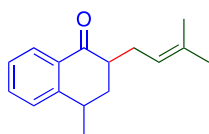

silica-gel column chromatography using ethyl acetate/hexane (1:99) mixture as eluent. Colorless liquid. Yield: 81 mg, 72%. IR (DCM): 2963, 2855, 1683,

1600, 1470, 1377, 1265, 894, 780  $cm^{-1}$ . <sup>1</sup>H NMR (400 MHz,  $CDCl_3$ ):  $\delta$  7.99-7.93 (m, 1H, ArCH), 7.41 (qd,  $J_1 = 7.4$  Hz,  $J_2 = 1.4$  Hz, 1H, ArCH), 7.26-7.19 (m, 2H, ArCH), 5.13-5.07 (m, 1H, Olefinic CH), 3.12-2.97 (m, 1H), 2.69-2.41 (m, 2H), 2.21-1.88 (m, 2H), 1.65 (s, 3H), 1.56 (s, 3H), 1.48 (d,  $J = 12.2$  Hz, 1H), 1.33 (dd,  $J_1 = 14.2$  Hz,  $J_2 = 7.0$  Hz, 3H). <sup>13</sup>C {<sup>1</sup>H} NMR (100.6 MHz,  $CDCl_3$ ):  $\delta$  200.1, 148.8, 148.2, 133.5, 133.4, 133.3, 131.6, 128.1, 127.5, 127.4, 126.5, 126.4, 126.3, 121.9, 121.8, 48.4, 43.2, 37.7, 34.6, 33.1, 31.5, 28.4, 28.1, 25.9, 21.6, 20.3, 17.9. HRMS (ESI)  $m/z$  calcd for  $C_{16}H_{20}O$  ( $M+H$ )<sup>+</sup> : 251.1389, found: 251.1406.

**6-Methoxy-2-(3-methylbut-2-en-1-yl)-3,4-dihydronaphthalen-1(2H)-one (2d):** Purified by

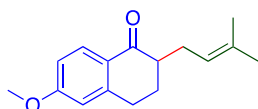

silica-gel column chromatography using ethyl acetate/hexane (1:99) mixture as eluent. Colorless liquid. Yield: 99 mg, 81% IR (DCM): 2927,

16767, 1600, 1495, 1352, 1251, 1154, 1029, 856, 830  $cm^{-1}$ . <sup>1</sup>H NMR (400 MHz,  $CDCl_3$ ):  $\delta$  7.92 (d,  $J = 8.7$  Hz, 1H, ArCH), 6.72 (dd,  $J_1 = 8.7$  Hz,  $J_2 = 2.4$  Hz, 1H, ArCH), 6.59 (s,  $J = 2.0$  Hz, 1H, ArCH), 5.11-5.07 (m, 1H, Olefinic CH), 3.75 (s, 3H), 2.86-2.83 (m, 2H), 2.59-2.52 (m, 1H), 2.39-2.31 (m, 1H), 2.17-2.06 (m, 2H), 1.79-1.69 (m, 1H), 1.63 (s, 3H), 1.55 (s, 3H). <sup>13</sup>C {<sup>1</sup>H} NMR (100.6 MHz,  $CDCl_3$ ):  $\delta$  198.8, 163.4, 146.6, 133.4, 129.9, 126.2, 122.0, 113.1, 112.4, 55.4, 47.7, 29.0, 28.2, 28.0, 25.9, 17.9. HRMS (ESI)  $m/z$  calcd for  $C_{16}H_{20}O$  ( $M+H$ )<sup>+</sup> : 251.1389, found: 251.1406.

**5-(Benzyloxy)-2-(3-methylbut-2-en-1-yl)-3,4-dihydronaphthalen-1(2H)-one (2e):** Purified

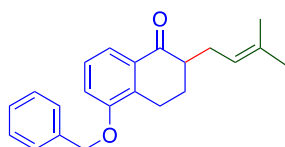

by silica-gel column chromatography using ethyl acetate/hexane



(1:99) mixture as eluent. Colorless liquid. Yield: 112 mg, 70%. IR (DCM): 2926, 1684, 1582, 1454, 1377, 1265, 1189, 1041, 905, 795  $\text{cm}^{-1}$ .  $^1\text{H}$  NMR (400 MHz,  $\text{CDCl}_3$ ):  $\delta$  7.67 (d,  $J = 7.8$  Hz, 1H, ArCH), 7.45-7.32 (m, 5H, ArCH), 7.24 (t,  $J = 7.9$  Hz, 1H, ArCH), 7.06 (d,  $J = 8.0$  Hz, 1H, ArCH), 5.20-5.16 (m, 1H, Olefinic CH), 5.10 (s, 2H), 3.18-3.11 (m, 1H), 2.84-2.75 (m, 1H), 2.64-2.45 (m, 2H), 2.25-2.18 (m, 2H), 1.87-1.80 (m, 1H), 1.72 (s, 3H), 1.63 (s, 3H).  $^{13}\text{C}$  { $^1\text{H}$ } NMR (100.6 MHz,  $\text{CDCl}_3$ ):  $\delta$  200.4, 156.0, 137.0, 133.9, 133.6, 128.7, 128.1, 127.3, 126.9, 121.9, 119.5, 115.5, 70.4, 47.7, 28.1, 27.3, 26.0, 22.3, 18.0. HRMS (ESI)  $m/z$  calcd for  $\text{C}_{22}\text{H}_{25}\text{O}_2$  (M+H) $^+$ :321.1855, found: 321.1859.

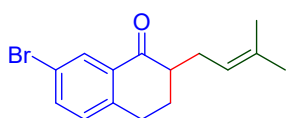

#### 7-Bromo-2-(3-methylbut-2-en-1-yl)-3,4-dihydronaphthalen-

**1(2H)-one (2f):** Purified by silica-gel column chromatography using ethyl acetate/hexane (1:99) mixture as eluent. Colorless liquid. Yield:

113 mg, 77%. IR (DCM): 2927, 1687, 1589, 1473, 1404, 1212, 850, 772  $\text{cm}^{-1}$ .  $^1\text{H}$  NMR (400 MHz,  $\text{CDCl}_3$ ):  $\delta$  8.06 (d,  $J = 2.3$  Hz, 1H, ArCH), 7.47 (dd,  $J_1 = 8.2$  Hz,  $J_2 = 2.2$  Hz, 1H, ArCH), 7.04 (d,  $J = 8.2$  Hz, 1H, ArCH), 5.10-5.05 (m, 1H, Olefinic CH), 2.88-2.81 (m, 2H), 2.58-2.53 (m, 1H), 2.43-2.36 (m, 1H), 2.17-2.10 (m, 2H), 1.80-1.72 (m, 1H), 1.64 (s, 3H), 1.56 (s, 3H).  $^{13}\text{C}$  NMR (101 MHz,  $\text{CDCl}_3$ ):  $\delta$  198.7, 142.9, 135.9, 134.2, 133.9, 130.6, 130.3, 121.5, 120.6, 47.9, 28.2, 28.0, 27.7, 25.9, 18. HRMS (ESI)  $m/z$  calcd for  $\text{C}_{15}\text{H}_{17}\text{OBr}$  (M+H) $^+$ :315.0368, found: 315.0355.

#### 4-(3,4-Dichlorophenyl)-2-(3-methylbut-2-en-1-yl)-3,4-dihydronaphthalen-1(2H)-one

**(2g):** Purified by silica-gel column chromatography using ethyl acetate/hexane (1:99) mixture

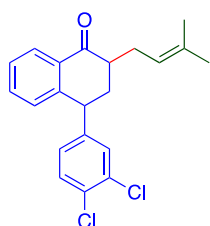

as eluent. Colorless liquid. Yield: 124 mg, 69%. IR (DCM): 2927, 1700, 1491, 1437, 1271, 1159, 892  $\text{cm}^{-1}$ .  $^1\text{H}$  NMR (400 MHz,  $\text{CDCl}_3$ ):  $\delta$  8.12 (dd,  $J_1 = 11.7$ ,  $J_2 = 7.9$  Hz, 1H, ArCH), 7.51-7.14 (m, 4H, ArCH), 7.06-7.04 (m, 1H, ArCH), 6.88-6.78 (m, 1H, ArCH), 5.18-5.03 (m, 1H, Olefinic CH), 4.38-4.19 (m, 1H), 2.80-2.48 (m, 2H), 2.38-2.20 (m, 2H), 1.96 (q,  $J = 13.2$  Hz, 1H), 1.70-1.62 (m,

6H).  $^{13}\text{C}$   $\{^1\text{H}\}$  NMR (100.6 MHz,  $\text{CDCl}_3$ ):  $\delta$  199.4, 199.0, 145.8, 145.1, 144.3, 143.9, 134.1, 134.1, 133.9, 133.4, 133.0, 132.9, 132.8, 132.8, 131.2, 130.9, 130.9, 130.9, 130.6, 130.5, 129.7, 129.0, 128.3, 128.0, 127.9, 127.8, 127.6, 127.3, 121.5, 121.1, 48.4, 46.0, 43.4, 42.5, 38.2, 35.9, 28.2, 28.0, 26.0, 26.0, 18.1, 18.0. HRMS (ESI)  $m/z$  calcd for  $\text{C}_{21}\text{H}_{20}\text{Cl}_2\text{O}$  ( $\text{M}+\text{H}$ ) $^+$ : 381.0789, found: 381.0803.

**7-Fluoro-2-(3-methylbut-2-en-1-yl)-3,4-dihydronaphthalen-1(2H)-one (2h):** Purified by

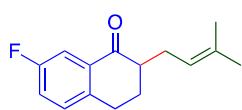

silica-gel column chromatography using ethyl acetate/hexane (1:99) mixture as eluent. Colorless liquid. Yield: 92 mg, 79%. IR (DCM): 2928,

1687, 1588, 1435, 1352, 1271, 1160, 892, 734  $\text{cm}^{-1}$ .  $^1\text{H}$  NMR (400 MHz,  $\text{CDCl}_3$ ):  $\delta$  7.61 (dd,  $J_1 = 9.3$  Hz,  $J_2 = 2.6$  Hz, 1H, ArCH), 7.11 (ddd,  $J_1 = 19.7$  Hz,  $J_2 = 8.2$  Hz,  $J_3 = 4.0$  Hz, 2H, ArCH), 5.10-5.07 (m, 1H, Olefinic CH), 2.87 (dd,  $J_1 = 9.7$  Hz,  $J_2 = 4.5$  Hz, 2H), 2.58-2.53 (m, 1H), 2.43-2.38 (m, 1H), 2.19-2.11 (m, 2H), 1.82-1.71 (m, 1H), 1.64 (s, 3H), 1.56 (s, 3H).  $^{13}\text{C}$   $\{^1\text{H}\}$  NMR (100.6 MHz,  $\text{CDCl}_3$ ):  $\delta$  199.1, 199.1, 162.8, 160.3, 139.9, 139.9, 134.2, 134.2, 133.8, 130.6, 130.5, 121.6, 120.6, 120.4, 113.4, 113.2, 47.8, 28.1, 28.0, 25.9, 18.0. HRMS (ESI)  $m/z$  calcd for  $\text{C}_{15}\text{H}_{17}\text{FO}$  ( $\text{M}+\text{H}$ ) $^+$ : 233.1348, found: 233.1336.

**3-(3-Methylbut-2-en-1-yl)chroman-4-one (2i):** Purified by silica-gel column

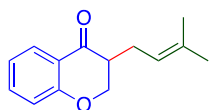

chromatography using ethyl acetate/hexane (1:99) mixture as eluent.

Colorless liquid. Yield: 30 mg, 28%. IR (DCM): 2924, 1695, 1605, 1479,

1269, 1125, 1014, 827, 780  $\text{cm}^{-1}$ .  $^1\text{H}$  NMR (400 MHz,  $\text{CDCl}_3$ ):  $\delta$  7.85 (dd,  $J_1 = 7.9$  Hz,  $J_2 = 1.3$  Hz, 1H, ArCH), 7.42 (td,  $J_1 = 7.8$  Hz,  $J_2 = 1.1$  Hz, 1H, ArCH), 6.99-6.90 (m, 2H, ArCH), 5.11 (td,  $J_1 = 7.4$  Hz,  $J_2 = 1.1$  Hz, 1H, Olefinic CH), 4.43 (dd,  $J_1 = 11.4$  Hz,  $J_2 = 4.5$  Hz, 1H,  $\text{CH}_2$ ), 4.21 (dd,  $J_1 = 11.4$  Hz,  $J_2 = 8.7$  Hz, 1H,  $\text{CH}_2$ ), 2.63 (tt,  $J_1 = 9.0$  Hz,  $J_2 = 4.5$  Hz, 1H,  $\text{CH}_2$ ), 2.51-2.45 (m, 1H,  $\text{CH}_2$ ), 2.23 (dt,  $J_1 = 14.8$  Hz,  $J_2 = 8.9$  Hz, 1H, CH), 1.68 (s, 3H,  $\text{CH}_3$ ),

1.58 (s, 3H, CH<sub>3</sub>). <sup>13</sup>C NMR (101 MHz, CDCl<sub>3</sub>): δ 194.4, 161.7, 135.8, 135.1, 127.5, 121.4, 120.7, 120.2, 117.8, 70.1, 46.4, 25.9, 25.1, 17.9. HRMS (ESI) m/z calcd for C<sub>14</sub>H<sub>16</sub>O<sub>2</sub> (M+H)<sup>+</sup>: 239.1058, found: 239.1043.

**6-Amino-2-(3-methylbut-2-en-1-yl)-3,4-dihydronaphthalen-1(2H)-one (2j)**: Purified by

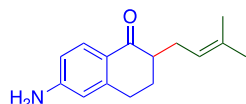

silica-gel column chromatography using ethyl acetate/hexane (5:95) mixture as eluent. Colorless liquid. Yield: 42 mg, 36%. IR (DCM): 3350,

3232, 2923, 2855, 1633, 1582, 1362, 1274, 893 cm<sup>-1</sup>. <sup>1</sup>H NMR (400 MHz, CDCl<sub>3</sub>): δ 7.84 (dd, *J*<sub>1</sub> = 8.4 Hz, *J*<sub>2</sub> = 3.4 Hz, 1H, ArCH), 6.48 (dd, *J*<sub>1</sub> = 8.4 Hz, *J*<sub>2</sub> = 2.3 Hz, 1H, ArCH), 6.35 (d, *J* = 2.1 Hz, 1H, ArCH), 5.11 (td, *J*<sub>1</sub> = 7.4 Hz, *J*<sub>2</sub> = 1.4 Hz, 1H, Olefinic CH), 4.06 (s, 2H, NH<sub>2</sub>), 2.78 (dd, *J*<sub>1</sub> = 7.4 Hz, *J*<sub>2</sub> = 4.9 Hz, 2H, CH<sub>2</sub>), 2.58 (dt, *J*<sub>1</sub> = 13.2 Hz, *J*<sub>2</sub> = 6.1 Hz, 1H, CH<sub>2</sub>), 2.35 (ddt, *J*<sub>1</sub> = 10.9 Hz, *J*<sub>2</sub> = 8.8 Hz, *J*<sub>3</sub> = 4.4 Hz, 1H, CH<sub>2</sub>), 2.19-2.05 (m, 2H, CH<sub>2</sub>), 1.79-1.71 (m, 1H, CH), 1.66 (s, 3H, CH<sub>3</sub>), 1.57 (s, 3H, CH<sub>3</sub>). <sup>13</sup>C NMR (101 MHz, CDCl<sub>3</sub>): δ 198.6, 151.2, 146.8, 133.3, 130.1, 124.0, 122.3, 113.3, 112.5, 47.7, 28.9, 28.4, 28.0, 26.0, 18.0. HRMS (ESI) m/z calcd for C<sub>15</sub>H<sub>19</sub>NO (M+H)<sup>+</sup>: 252.1364, found: 252.1375.

**2-(3-Methylbut-2-en-1-yl)-6-((3-methylbut-2-en-1-yl)amino)-3,4-dihydronaphthalen-**

**1(2H)-one (2j')**: Purified by silica-gel column chromatography using ethyl acetate/hexane

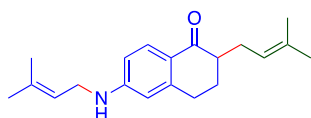

(2:98) mixture as eluent. Colorless liquid. Yield: 64 mg, 46%. IR (DCM): 3438, 2924, 1652, 1597, 1354, 1273, 1229, 1126, 759 cm<sup>-1</sup>

.<sup>1</sup>H NMR (400 MHz, CDCl<sub>3</sub>): δ 7.85 (d, *J* = 8.7 Hz, 1H, ArCH), 6.43-6.41 (m, 1H, ArCH), 6.24 (s, 1H, ArCH), 5.26-5.23 (m, 1H, Olefinic CH), 5.14-5.10 (m, 1H, Olefinic CH), 4.26 (s, 1H, NH), 3.68 (d, *J* = 6.8 Hz, 2H, CH<sub>2</sub>), 2.80 (t, *J* = 6.1 Hz, 2H, CH<sub>2</sub>), 2.60-2.55 (m, 1H, CH<sub>2</sub>), 2.35 (dt, *J*<sub>1</sub> = 9.9 Hz, *J*<sub>2</sub> = 4.9 Hz, 1H, CH), 2.19-2.06 (m, 2H, CH<sub>2</sub>), 1.76-1.73 (m, 1H, CH), 1.67 (d, *J* = 17.0 Hz, 9H, CH<sub>3</sub>), 1.57 (s, 3H, CH<sub>3</sub>). <sup>13</sup>C NMR (101 MHz, CDCl<sub>3</sub>): δ 198.4, 152.0, 146.7, 136.8, 133.2, 129.8, 122.9, 122.4, 120.5, 111.7, 109.7, 47.5, 41.4, 29.1, 28.4, 28.0, 26.0, 25.8, 18.1, 18.0. HRMS (ESI) m/z calcd for C<sub>20</sub>H<sub>27</sub>N<sub>2</sub>O (M+H)<sup>+</sup>: 320.1990, found: 320.2000.

**2-(3-Methylbut-2-en-1-yl)-2,3-dihydro-1H-inden-1-one (2k):** Purified by silica-gel column

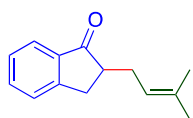

chromatography using ethyl acetate/hexane (1:99) mixture as eluent.

Colorless liquid. Yield: 80 mg, 80%. IR (DCM): 2926, 1699, 1608, 1436, 1267, 1092, 739  $\text{cm}^{-1}$ .  $^1\text{H}$  NMR (400 MHz,  $\text{CDCl}_3$ ):  $\delta$  7.77 (d,  $J = 7.6$  Hz, 1H, ArCH), 7.60 (t,  $J = 7.4$  Hz, 1H, ArCH), 7.47 (d,  $J = 7.6$  Hz, 1H, ArCH), 7.38 (t,  $J = 7.4$  Hz, 1H, ArCH), 5.14 (t,  $J = 6.7$  Hz, 1H, Olefinic CH), 3.28 (dd,  $J_1 = 17.3$  Hz,  $J_2 = 7.7$  Hz, 1H), 2.85-2.61 (m, 3H,  $\text{CH}_2$  & CH), 2.27 (dt,  $J_1 = 14.9$  Hz,  $J_2 = 7.7$  Hz, 1H, CH), 1.68 (d,  $J = 19.2$  Hz, 6H,  $\text{CH}_3$ ).  $^{13}\text{C}$  { $^1\text{H}$ } NMR (100.6 MHz,  $\text{CDCl}_3$ ): 208.8, 154.0, 136.9, 134.8, 134.7, 134.0, 127.4, 126.7, 124.0, 121.1, 47.7, 32.3, 29.7, 25.9, 18.1. HRMS (ESI)  $m/z$  calcd for  $\text{C}_{14}\text{H}_{16}\text{O}$  ( $\text{M}+\text{H}$ ) $^+$  : 223.1098, found: 223.1103

**5,6-Dimethoxy-2-(3-methylbut-2-en-1-yl)-2,3-dihydro-1H-inden-1-one (2l):**

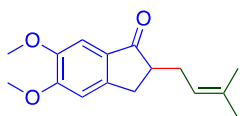

Purified by silica-gel column chromatography using ethyl acetate/hexane

(1:99) mixture as eluent. Colorless liquid. Yield: 120 mg, 93%. IR (DCM):

3438, 1700, 1576, 1507, 1456, 1387, 1312, 778  $\text{cm}^{-1}$ .  $^1\text{H}$  NMR (400 MHz,  $\text{CDCl}_3$ ):  $\delta$  7.20 (s, 1H, ArCH), 6.90 (s, 1H, ArCH), 5.13 (t,  $J = 6.7$  Hz, 1H, Olefinic CH), 3.96 (d,  $J = 22.3$  Hz, 6H,  $\text{CH}_2$ ), 3.19 (dd,  $J_1 = 17.6$  Hz,  $J_2 = 8.1$  Hz, 1H,  $\text{CH}_2$ ), 2.76-2.73 (m, 2H,  $\text{CH}_2$ ), 2.62 (t,  $J = 7.1$  Hz, 1H,  $\text{CH}_2$ ), 2.27 (dd,  $J_1 = 14.8$  Hz,  $J_2 = 7.6$  Hz, 1H, CH), 1.69 (d,  $J = 18.1$  Hz, 6H,  $\text{CH}_3$ ).  $^{13}\text{C}$  NMR (101 MHz,  $\text{CDCl}_3$ ):  $\delta$  207.3, 155.4, 149.3, 149.2, 133.7, 129.5, 121.1, 107.4, 104.2, 56.2, 56.0, 47.7, 31.9, 29.8, 25.8, 17.9. HRMS (ESI)  $m/z$  calcd for  $\text{C}_{16}\text{H}_{20}\text{O}_3$  ( $\text{M}+\text{H}$ ) $^+$  : 260.1412, found: 260.1430.

**6-(3-Methylbut-2-en-1-yl)-6,7-dihydro-5H-indeno[5,6-d][1,3]dioxol-5-one (2m):** Purified

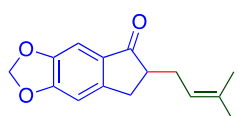

by silica-gel column chromatography using ethyl acetate/hexane (1:99)

mixture as eluent. Colorless liquid. Yield: 91 mg, 75%. IR (DCM): 2913,

1699, 1471, 1383, 1037, 940, 869, 735  $\text{cm}^{-1}$ .  $^1\text{H}$  NMR (400 MHz,  $\text{CDCl}_3$ )  $\delta$  7.05 (s, 1H, ArCH),

6.75 (s, 1H, ArCH), 6.01 (s, 2H, ArCH), 5.04 (t,  $J = 7.3$  Hz, 1H, Olefinic CH), 3.11-3.05 (m, 1H, CH<sub>2</sub>), 2.69-2.60 (m, 2H, CH<sub>2</sub>), 2.52 (dt,  $J_1 = 13.6$ ,  $J_2 = 6.3$  Hz, 1H, CH<sub>2</sub>), 2.16 (dt,  $J_1 = 15.1$  Hz,  $J_2 = 7.8$  Hz, 1H, CH), 1.63 (s, 3H, CH<sub>3</sub>), 1.58 (s, 3H, CH<sub>3</sub>). <sup>13</sup>C NMR (101 MHz, CDCl<sub>3</sub>):  $\delta$  206.7, 154.3, 151.5, 148.3, 134.0, 131.4, 121.1, 105.8, 102.5, 102.2, 48.1, 32.2, 29.9, 25.9, 18.0. HRMS (ESI)  $m/z$  calcd for C<sub>15</sub>H<sub>16</sub>O<sub>3</sub> (M+H)<sup>+</sup> : 267.1018, found: 267.0992.

**2-(3-Methylbut-2-en-1-yl)-3-phenyl-2,3-dihydro-1H-inden-1-one (2n):**

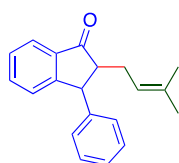

Purified by silica-gel column chromatography using ethyl acetate/hexane (1:99) mixture as an eluent. Colorless liquid. Yield: 95 mg, 69%. IR (DCM):

3478, 2926, 2811, 1735, 1694, 1472, 1376, 1286, 1094, 744 cm<sup>-1</sup>. <sup>1</sup>H NMR

(400 MHz, CDCl<sub>3</sub>):  $\delta$  7.72 (d,  $J = 7.6$  Hz, 1H, ArCH), 7.49-7.45 (m, 1H, ArCH), 7.33 (t,  $J = 7.4$  Hz, 1H, ArCH), 7.24-7.21 (m, 2H, ArCH), 7.18-7.15 (m, 1H, ArCH), 7.11 (d,  $J = 7.7$  Hz, 1H, ArCH), 7.03-7.00 (m, 2H, ArCH), 4.99 (t,  $J = 7.4$  Hz, 1H, Olefinic CH), 4.11 (d,  $J = 4.5$  Hz, 1H, CH), 2.66 (dt,  $J_1 = 7.5$  Hz,  $J_2 = 4.6$  Hz, 1H, CH<sub>2</sub>), 2.48 (ddt,  $J_1 = 30.3$  Hz,  $J_2 = 14.8$  Hz,  $J_3 = 7.4$  Hz, 2H, CH), 1.60 (s, 3H, CH<sub>3</sub>), 1.57 (s, 3H, CH<sub>3</sub>). <sup>13</sup>C NMR (101 MHz, CDCl<sub>3</sub>):  $\delta$  207.3, 156.7, 143.3, 136.2, 134.8, 133.8, 128.5, 127.9, 127.6, 126.6, 126.5, 123.1, 120.5, 58.0, 50.1, 28.0, 25.5, 17.8. HRMS (ESI)  $m/z$  calcd for C<sub>20</sub>H<sub>20</sub>O (M+H)<sup>+</sup> : 299.1411, found: 299.1420.

**2-(3-Methylbut-2-en-1-yl)-4-(trifluoromethyl)-2,3-dihydro-1H-inden-1-one (2o):** Purified

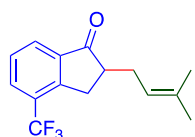

by silica-gel column chromatography using ethyl acetate/hexane (1:99)

mixture as an eluent. Colorless liquid. Yield: 68 mg, 51%. IR (DCM): 3445,

2973, 17212, 1699, 1486, 1377, 1163, 1059, 811, 708 cm<sup>-1</sup>. <sup>1</sup>H NMR (400 MHz, CDCl<sub>3</sub>):  $\delta$  7.91 (d,  $J = 7.7$  Hz, 1H, ArCH), 7.83 (d,  $J = 7.6$  Hz, 1H, ArCH), 7.51-7.47 (m, 1H, ArCH), 5.09 (t,  $J = 7.3$  Hz, 1H, Olefinic CH), 3.44 (dd,  $J_1 = 18.1$  Hz,  $J_2 = 8.1$  Hz, 1H, CH<sub>2</sub>), 2.94 (dd,

$J_1 = 18.1$  Hz,  $J_2 = 3.6$  Hz, 1H,  $CH_2$ ), 2.76 (tt,  $J_1 = 8.5$  Hz,  $J_2 = 4.2$  Hz, 1H,  $CH_2$ ), 2.64-2.57 (m, 1H,  $CH_2$ ), 2.26 (dt,  $J_1 = 15.0$  Hz,  $J_2 = 7.7$  Hz, 1H,  $CH$ ), 1.67 (s, 3H,  $CH_3$ ), 1.63 (s, 3H,  $CH_3$ ).  $^{13}C$  NMR (101 MHz,  $CDCl_3$ ):  $\delta$  207.3, 151.3, 138.4, 134.7, 131.3, 131.3, 127.8, 127.5, 120.4, 47.3, 31.0, 29.6, 25.9, 18.0. HRMS (ESI)  $m/z$  calcd for  $C_{15}H_{15}F_3O$  (M+H) $^+$  : 291.0987, found: 291.0967.

**5,7-Dichloro-2-(3-methylbut-2-en-1-yl)-2,3-dihydro-1H-inden-1-one (2p):** Purified by

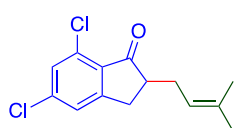

silica-gel column chromatography using ethyl acetate/hexane (1:99)

mixture as eluent. Colorless liquid. Yield: 41 mg, 31%. IR (DCM): 2942,

1654, 1635, 1457, 1036, 875, 737  $cm^{-1}$ .  $^1H$  NMR (400 MHz,  $CDCl_3$ ):  $\delta$  7.26-7.25 (m, 2H, ArCH), 5.04- 4.99 (m, 1H, Olefinic CH), 3.16 -3.09 (m, 1H,  $CH_2$ ), 2.55 -2.48 (m, 2H,  $CH_2$ ), 2.24 -2.16 (m, 1H, CH), 1.62 (s, 3H,  $CH_3$ ), 1.56 (s, 3H,  $CH_3$ ).  $^{13}C$  NMR (101 MHz,  $CDCl_3$ ):  $\delta$  204.1, 157.2, 141.0, 134.6, 132.8, 131.5, 129.3, 125.4, 120.5, 48.4, 31.5, 29.7, 25.9, 18.0. HRMS (ESI)  $m/z$  calcd for  $C_{14}H_{14}Cl_2O$  (M+H) $^+$  : 269.0500, found: 269.0521.

**5-Bromo-2-(3-methylbut-2-en-1-yl)-2,3-dihydro-1H-inden-1-one (2q):**

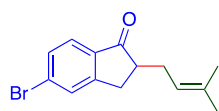

Purified by silica-gel column chromatography using ethyl acetate/hexane

(1:99) mixture as eluent. Colorless liquid. Yield: 99 mg, 71%. IR (DCM):

2923, 1716, 1699, 1575, 1432, 1316, 1199, 1057, 868  $cm^{-1}$ .  $^1H$  NMR (400 MHz,  $CDCl_3$ ):  $\delta$  7.56 (d,  $J = 11.9$  Hz, 2H, ArCH), 7.46-7.44 (m, 1H, ArCH), 5.03 (t,  $J = 7.1$  Hz, 1H, Olefinic CH), 3.19 (dd,  $J_1 = 17.3$  Hz,  $J_2 = 7.8$  Hz, 1H,  $CH_2$ ), 2.77-2.64 (m, 2H,  $CH_2$ ), 2.56-2.50 (m, 1H,  $CH_2$ ), 2.24-2.16 (m, 1H, CH), 1.63 (s, 3H,  $CH_3$ ), 1.58 (s, 3H,  $CH_3$ ).  $^{13}C$  NMR (101 MHz,  $CDCl_3$ ):  $\delta$  207.5, 155.6, 135.8, 134.4, 131.0, 130.1, 130.0, 125.23, 120.6, 47.7, 31.9, 29.6, 25.9, 18.1. HRMS (ESI)  $m/z$  calcd for  $C_{14}H_{15}BrO$  (M+H) $^+$  : 301.0212, found: 301.0198.

**(E)-2-(3,7-Dimethylocta-2,6-dien-1-yl)-3,4-dihydronaphthalen-1(2H)-one (2r):** Purified

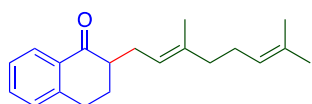

by silica-gel column chromatography using ethyl acetate/hexane (1:99) mixture as eluent. Colorless liquid. Yield: 134 mg, 95%. IR

(DCM): 2925, 1682, 1456, 1282, 1220, 74  $\text{cm}^{-1}$ .  $^1\text{H}$  NMR (400 MHz,  $\text{CDCl}_3$ ):  $\delta$  7.97 (dd,  $J_1 = 7.8$  Hz,  $J_2 = 0.8$  Hz, 1H, ArCH), 7.38 (dd,  $J_1 = 7.5$  Hz,  $J_2 = 1.4$  Hz, 1H, ArCH), 7.25-7.15 (m, 2H, ArCH), 5.14-4.99 (m, 2H, Olefinic CH), 2.91 (dd,  $J_1 = 7.5$  Hz,  $J_2 = 4.7$  Hz, 2H,  $\text{CH}_2$ ), 2.63-2.58 (m, 1H,  $\text{CH}_2$ ), 2.46-2.40 (m, 1H,  $\text{CH}_2$ ), 2.22-2.13 (m, 2H,  $\text{CH}_2$ ), 2.03-1.94 (m, 4H,  $\text{CH}_2$ ), 1.78 (ddt,  $J_1 = 13.3$  Hz,  $J_2 = 11.5$  Hz,  $J_3 = 7.6$  Hz, 1H, CH), 1.60-1.53 (m, 9H,  $\text{CH}_3$ ).  $^{13}\text{C}$  NMR (101 MHz,  $\text{CDCl}_3$ ):  $\delta$  200.1, 144.2, 144.2, 137.3, 137.2, 133.2, 132.7, 131.7, 131.4, 128.8, 128.7, 127.5, 126.6, 124.4, 124.3, 122.6, 121.9, 48.2, 48.1, 39.9, 32.1, 29.8, 28.8, 28.2, 28.0, 28.0, 27.9, 26.7, 26.6, 25.8, 23.6, 17.8, 16.2. HRMS (ESI)  $m/z$  calcd for  $\text{C}_{20}\text{H}_{26}\text{O}$  ( $\text{M}+\text{H}$ ) $^+$ : 283.2058, found: 283.2056.

**2-((2E,6E)-3,7,11-Trimethyldodeca-2,6,10-trien-1-yl)-3,4-dihydronaphthalen-1(2H)-one**

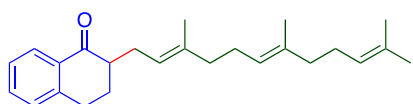

**(2s):** Purified by silica-gel column chromatography using ethyl acetate/hexane (1:99) mixture as eluent. Colorless

liquid. Yield: 152 mg, 87%. IR (DCM): 2925, 1700, 1600, 1454, 1375, 1220, 739  $\text{cm}^{-1}$ .  $^1\text{H}$  NMR (400 MHz,  $\text{CDCl}_3$ ):  $\delta$  7.96 (d,  $J = 7.8$  Hz, 1H, ArCH), 7.37 (td,  $J_1 = 7.4$  Hz,  $J_2 = 1.3$  Hz, 1H, ArCH), 7.22 (t,  $J = 7.5$  Hz, 1H, ArCH), 7.15 (d,  $J = 7.7$  Hz, 1H, ArCH), 5.13-5.00 (m, 3H, Olefinic CH), 2.90 (dd,  $J_1 = 7.2$  Hz,  $J_2 = 4.5$  Hz, 2H,  $\text{CH}_2$ ), 2.59 (td,  $J_1 = 9.9$  Hz,  $J_2 = 4.5$  Hz, 1H,  $\text{CH}_2$ ), 2.44-2.40 (m, 1H,  $\text{CH}_2$ ), 2.20-2.12 (m, 2H,  $\text{CH}_2$ ), 2.04-1.94 (m, 7H,  $\text{CH}_2$ ), 1.89 (q,  $J = 7.5$  Hz, 1H,  $\text{CH}_2$ ), 1.81-1.76 (m, 1H, CH), 1.61-1.52 (m, 12H,  $\text{CH}_3$ ).  $^{13}\text{C}$  NMR (101 MHz,  $\text{CDCl}_3$ ):  $\delta$  200.0, 144.2, 137.2, 137.2, 135.1, 133.2, 132.7, 131.6, 131.3, 128.7, 127.5, 126.6, 125.1, 124.4, 124.2, 121.9, 121.8, 48.1, 40.2, 39.9, 39.8, 32.1, 28.8, 28.7, 28.0,

28.0, 28.0, 26.8, 26.7, 26.6, 26.5, 25.8, 25.8, 23.6, 23.5, 17.8, 17.7, 16.3, 16.2, 16.1. HRMS (ESI)  $m/z$  calcd for  $C_{25}H_{35}O$  ( $M+H$ )<sup>+</sup>: 351.2688, found: 351.2709.

**(E)-2-(3,7,11,15-Tetramethylhexadec-2-en-1-yl)-**

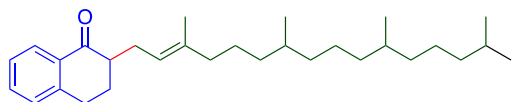

**3,4-dihydronaphthalen-1(2H)-one (2t):**

Purified by silica-gel column chromatography using ethyl acetate/hexane (1:99) mixture as eluent. Colorless liquid. Yield: 202 mg, 95%. IR (DCM): 2925, 1686.92, 1455, 1282, 1219, 742  $cm^{-1}$ . <sup>1</sup>H NMR (400 MHz,  $CDCl_3$ ):  $\delta$  7.97 (d,  $J = 7.8$  Hz, 1H, ArCH), 7.38 (t,  $J = 7.4$  Hz, 1H, ArCH), 7.21 (q,  $J = 6.9$  Hz, 1H, ArCH), 7.16 (d,  $J = 7.6$  Hz, 1H, ArCH), 5.12 (t,  $J = 7.2$  Hz, 1H, Olefinic CH), 2.91 (dd,  $J_1 = 7.5$  Hz,  $J_2 = 4.7$  Hz, 2H,  $CH_2$ ), 2.60 (dt,  $J_1 = 14.3$  Hz,  $J_2 = 5.4$  Hz, 1H,  $CH_2$ ), 2.43 (ddd,  $J_1 = 11.8$  Hz,  $J_2 = 8.3$  Hz,  $J_3 = 3.9$  Hz, 1H,  $CH_2$ ), 2.17 (ddd,  $J_1 = 19.9$  Hz,  $J_2 = 11.2$  Hz,  $J_3 = 5.7$  Hz, 2H,  $CH_2$ ), 1.91 (t,  $J = 7.4$  Hz, 2H,  $CH_2$ ), 1.82-1.76 (m, 1H,  $CH_2$ ), 1.56 (s, 3H,  $CH_3$ ), 1.46 (dt,  $J_1 = 13.2$  Hz,  $J_2 = 6.6$  Hz, 1H,  $CH_2$ ), 1.33-1.25 (m, 4H,  $CH_2$ ), 1.20 (ddd,  $J_1 = 13.1$  Hz,  $J_2 = 9.8$  Hz,  $J_3 = 4.2$  Hz, 7H,  $CH_2$ ), 1.10-1.06 (m, 2H,  $CH_2$ ), 1.02-0.95 (m, 4H,  $CH_2$ ), 0.79 (d,  $J = 14.1$  Hz, 13H, CH &  $CH_3$ ). <sup>13</sup>C NMR (101 MHz,  $CDCl_3$ ):  $\delta$  200.0, 144.1, 137.6, 133.1, 132.6, 128.7, 128.7, 127.5, 126.6, 122.2, 121.5, 48.1, 40.2, 39.4, 37.5, 37.5, 37.4, 36.7, 34.7, 32.9, 32.8, 32.8, 32.7, 31.7, 28.8, 28.7, 28.1, 28.1, 28.0, 27.8, 27.0, 25.57, 25.4, 24.9, 24.6, 23.6, 22.8, 22.7, 19.8, 16.2. HRMS (ESI)  $m/z$  calcd for  $C_{30}H_{49}O$  ( $M+H$ )<sup>+</sup>: 425.3783, found: 425.3783.

**5-Methyl-1-phenylhex-4-en-1-one (3a):**<sup>1</sup> Purified by silica-gel column chromatography using

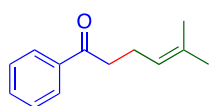

ethyl acetate/hexane (1:99) mixture as eluent. Colorless liquid. Yield: 54 mg, 58%. IR (DCM): 1697, 1458, 1435, 1185, 735  $cm^{-1}$ . <sup>1</sup>H NMR (400 MHz,  $CDCl_3$ ):  $\delta$  7.98 (d,  $J = 7.9$  Hz, 2H, ArCH), 7.56 (d,  $J = 7.4$  Hz, 1H, ArCH), 7.48 (t,  $J = 7.6$  Hz, 2H, ArCH), 5.20 (td,  $J_1 = 7.1$  Hz,  $J_2 = 0.8$  Hz, 1H, Olefinic CH), 3.02 (t,  $J = 7.5$  Hz, 2H,  $CH_2$ ), 2.44 (q,  $J = 7.4$  Hz, 2H,  $CH_2$ ), 1.71 (s, 3H,  $CH_3$ ), 1.66 (s, 3H,  $CH_3$ ). <sup>13</sup>C NMR (101



MHz, CDCl<sub>3</sub>):  $\delta$  200.2, 137.1, 133.0, 132.9, 128.7, 128.2, 123.0, 38.9, 25.8, 23.0, 17.8. HRMS (ESI)  $m/z$  calcd for C<sub>15</sub>H<sub>19</sub>O (M+H)<sup>+</sup>: 215.1436, found: 215.1480.

**5-Methyl-1-(p-tolyl)hex-4-en-1-one (3b):**<sup>1</sup> Purified by silica-gel column chromatography

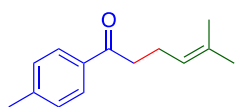

using ethyl acetate/hexane (1:99) mixture as eluent. Colorless liquid.

Yield: 70 mg, 71%. IR (DCM): 1695, 1456, 1436, 1180, 831, 735 cm<sup>-1</sup>. <sup>1</sup>H

NMR (400 MHz, CDCl<sub>3</sub>):  $\delta$  7.80 (d,  $J$  = 8.1 Hz, 2H, ArCH), 7.19 (d,  $J$  = 8.1 Hz, 2H, ArCH), 5.13-5.09 (m, 1H, Olefinic CH), 2.90 (t,  $J$  = 7.5 Hz, 2H, CH<sub>2</sub>), 2.37-2.32 (m, 5H, CH<sub>2</sub> & ArCH<sub>3</sub>), 1.63 (s, 3H, CH<sub>3</sub>), 1.57 (s, 3H, CH<sub>3</sub>). <sup>13</sup>C NMR (101 MHz, CDCl<sub>3</sub>):  $\delta$  199.9, 143.7, 134.6, 132.8, 129.3, 128.3, 123.1, 38.7, 25.8, 23.1, 21.7, 17.8. HRMS (ESI)  $m/z$  calcd for C<sub>14</sub>H<sub>18</sub>O (M+H)<sup>+</sup> : 225.1255, found: 225.1259.

**1-Mesityl-5-methylhex-4-en-1-one (3c):**<sup>1</sup> Purified by silica-gel column chromatography

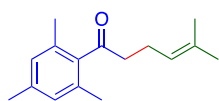

using ethyl acetate/hexane (1:99) mixture as an eluent. Colorless liquid.

Yield: 61 mg, 53% . IR (DCM): 3443, 1696, 1558, 1457, 1434, 850, 702

cm<sup>-1</sup> . <sup>1</sup>H NMR (400 MHz, CDCl<sub>3</sub>):  $\delta$  6.75 (s, 2H, ArCH), 5.06 (t,  $J$  = 7.3 Hz, 1H, Olefinic CH), 2.64 (t,  $J$  = 7.4 Hz, 2H, CH<sub>2</sub>), 2.31 (d,  $J$  = 7.3 Hz, 2H, CH<sub>2</sub>), 2.19 (s, 3H, ArCH<sub>3</sub>), 2.10 (s, 6H, ArCH<sub>3</sub>), 1.60 (s, 3H, CH<sub>3</sub>), 1.56 (s, 3H, CH<sub>3</sub>). <sup>13</sup>C NMR (101 MHz, CDCl<sub>3</sub>):  $\delta$  210.7, 139.8, 138.3, 133.0, 132.6, 128.5, 122.8, 44.9, 25.8, 22.2, 21.1, 19.2, 17.8. HRMS (ESI)  $m/z$  calcd for C<sub>16</sub>H<sub>22</sub>O (M+H)<sup>+</sup> : 253.1535, found: 253.1563.

**1-(4-Methoxyphenyl)-5-methylhex-4-en-1-one (3d):**<sup>1</sup> Purified by silica-gel column

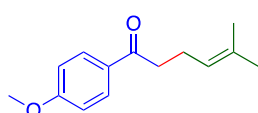

chromatography using ethyl acetate/hexane (1:99) mixture as eluent.

Colorless liquid. Yield: 95 mg, 88% . IR (DCM): 2925, 1678, 1511,

1258, 1171, 1031, 97, 841 cm<sup>-1</sup>. <sup>1</sup>H NMR (400 MHz, CDCl<sub>3</sub>):  $\delta$  7.96 (d,  $J$  = 8.8 Hz, 2H, ArCH), 6.95 (d,  $J$  = 8.8 Hz, 2H, ArCH), 5.19 (td,  $J_1$  = 7.2,  $J$  = 1.0 Hz, 1H, Olefinic CH), 3.88 (s, 3H, ArOCH<sub>3</sub>), 2.96 (t,  $J$  = 7.5 Hz, 2H, CH<sub>2</sub>), 2.43 (q,  $J$  = 7.4 Hz, 2H, CH<sub>2</sub>), 1.71 (s, 3H, CH<sub>3</sub>), 1.65

(s, 3H,  $CH_3$ ).  $^{13}C$  NMR (101 MHz,  $CDCl_3$ ):  $\delta$  198.6, 163.3, 132.6, 130.3, 130.1, 123.1, 113.6, 55.4, 38.4, 25.7, 23.1, 17.6. HRMS (ESI)  $m/z$  calcd for  $C_{14}H_{18}O_2$  ( $M+H$ ) $^+$  : 241.1208, found: 241.1199.

**1-(2,3-Dihydrobenzo[b][1,4]dioxin-6-yl)-5-methylhex-4-en-1-one (3e):** Purified by silica-

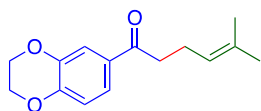

gel column chromatography using ethyl acetate/hexane (1:99) mixture as an eluent. Colorless liquid. Yield: 68 mg, 55% . IR (DCM): 3445, 1683, 1582, 1457, 1319, 1260, 1066, 893, 738  $cm^{-1}$ .  $^1H$  NMR (400 MHz,  $CDCl_3$ ):  $\delta$  7.44-7.41 (m, 2H, ArCH), 6.83 (d,  $J = 8.9$  Hz, 1H, ArCH), 5.09 (t,  $J = 7.2$  Hz, 1H, Olefinic CH), 4.25-4.20 (m, 4H,  $CH_2$ ), 2.84 (t,  $J = 7.5$  Hz, 2H,  $CH_2$ ), 2.32 (q,  $J = 7.4$  Hz, 2H,  $CH_2$ ), 1.62 (s, 3H,  $CH_3$ ), 1.56 (s, 3H,  $CH_3$ ).  $^{13}C$  NMR (101 MHz,  $CDCl_3$ ):  $\delta$  198.6, 147.9, 143.3, 132.7, 131.0, 123.17, 122.2, 117.6, 117.2, 64.7, 64.2, 38.5, 25.8, 23.2, 17.8. HRMS (ESI)  $m/z$  calcd for  $C_{15}H_{18}O_3$  ( $M+H$ ) $^+$  : 269.1153, found: 269.1157.

**5-Methyl-1-(3,4,5-trimethoxyphenyl)hex-4-en-1-one (3f) :** Purified by silica-gel column

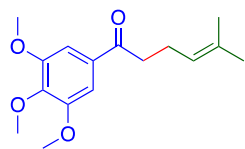

chromatography using ethyl acetate/hexane (1:99) mixture as eluent. Colorless liquid. Yield: 64 mg, 46% . IR (DCM): 2928, 1700, 1585, 1456, 1322, 1231, 1154, 1004, 895, 835  $cm^{-1}$ .  $^1H$  NMR (400 MHz,  $CDCl_3$ ):  $\delta$  7.15 (s, 2H, ArCH), 5.12-5.09 (m, 1H, Olefinic CH), 3.84 (s, 9H,  $ArOCH_3$ ), 2.89 (t,  $J = 7.5$  Hz, 2H,  $CH_2$ ), 2.34 (q,  $J = 7.4$  Hz, 2H,  $CH_2$ ), 1.63 (s, 3H,  $CH_3$ ), 1.58 (s, 3H,  $CH_3$ ).  $^{13}C$  NMR (101 MHz,  $CDCl_3$ )  $\delta$  198.8, 153.1, 142.5, 132.9, 132.4, 123.0, 105.6, 61.0, 56.3, 38.6, 25.8, 23.2, 17.8. HRMS (ESI)  $m/z$  calcd for  $C_{16}H_{22}O_4$  ( $M+H$ ) $^+$  : 301.1404, found: 301.1410.

**1-(4-Fluorophenyl)-5-methylhex-4-en-1-one (3g):** Purified by silica-gel column

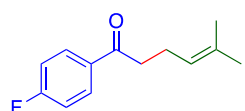

chromatography using ethyl acetate/hexane (1:99) mixture as eluent. Colorless liquid. Yield: 68 mg, 66% . IR (DCM): 3438, 1696, 1558, 1457,

1407, 850, 807, 740  $\text{cm}^{-1}$ .  $^1\text{H}$  NMR (400 MHz,  $\text{CDCl}_3$ ):  $\delta$  7.91 (dd,  $J_1 = 8.1$  Hz,  $J_2 = 5.8$  Hz, 2H, ArCH), 7.05 (t,  $J = 8.5$  Hz, 2H, ArCH), 5.09 (td,  $J_1 = 7.2$  Hz,  $J_2 = 1.0$  Hz, 1H, Olefinic CH), 2.90 (t,  $J = 7.5$  Hz, 2H,  $\text{CH}_2$ ), 2.34 (d,  $J = 7.3$  Hz, 2H,  $\text{CH}_2$ ), 1.62 (s, 3H,  $\text{CH}_3$ ), 1.56 (s, 3H,  $\text{CH}_3$ ).  $^{13}\text{C}$  NMR (101 MHz,  $\text{CDCl}_3$ ):  $\delta$  198.5, 167.0, 164.4, 133.5, 133.5, 133.0, 130.8, 130.7, 122.9, 115.8, 115.6, 38.7, 25.8, 23.0, 17.8. HRMS (ESI)  $m/z$  calcd for  $\text{C}_{13}\text{H}_{25}\text{OF}$  ( $\text{M}+\text{H}$ ) $^+$  : 229.1000, found: 229.0999.

**1-(4-Chlorophenyl)-5-methylhex-4-en-1-one (3h):<sup>1</sup>** Purified by silica-gel column

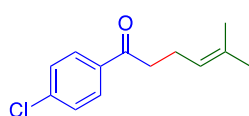

chromatography using ethyl acetate/hexane (1:99) mixture as an eluent.

Colorless liquid. Yield: 83 mg, 75% . IR (DCM): 3438, 1684, 1635, 1362, 1093, 912, 734  $\text{cm}^{-1}$ .  $^1\text{H}$  NMR (400 MHz,  $\text{CDCl}_3$ ):  $\delta$  7.82 (d,  $J = 8.6$  Hz, 2H, ArCH), 7.36 (d,  $J = 8.6$  Hz, 2H, ArCH), 5.10-5.06 (m, 1H, Olefinic CH), 2.91-2.87 (m, 2H,  $\text{CH}_2$ ), 2.34 (q,  $J = 7.2$  Hz, 2H,  $\text{CH}_2$ ), 1.62 (s, 3H,  $\text{CH}_3$ ), 1.56 (s, 3H,  $\text{CH}_3$ ).  $^{13}\text{C}$  NMR (101 MHz,  $\text{CDCl}_3$ ):  $\delta$  198.9, 139.4, 135.4, 133.1, 129.6, 129.0, 122.8, 38.8, 25.8, 23.0, 17.8. HRMS (ESI)  $m/z$  calcd for  $\text{C}_{13}\text{H}_{16}\text{ClO}$  ( $\text{M}+\text{H}$ ) $^+$ : 223.0890, found: 223.0900.

**1-(4-Bromophenyl)-5-methylhex-4-en-1-one (3i):<sup>1</sup>** Purified by silica-

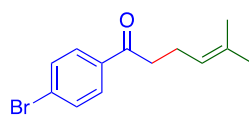

gel column chromatography using ethyl acetate/hexane (1:99) mixture

as an eluent. Colorless liquid. Yield: 76 mg, 57% . IR (DCM): 3446, 2925, 1683, 1585, 1483, 1259, 1070, 978, 789  $\text{cm}^{-1}$ .  $^1\text{H}$  NMR (400 MHz,  $\text{CDCl}_3$ ):  $\delta$  7.76-7.72 (m, 2H, ArCH), 7.54-7.50 (m, 2H, ArCH), 5.10-5.05 (m, 1H, Olefinic CH), 2.90-2.86 (m, 2H,  $\text{CH}_2$ ), 2.36-2.30 (m, 2H,  $\text{CH}_2$ ), 1.61 (s, 3H,  $\text{CH}_3$ ), 1.56 (s, 3H,  $\text{CH}_3$ ).  $^{13}\text{C}$  NMR (101 MHz,  $\text{CDCl}_3$ ):  $\delta$  199.1, 135.8, 133.1, 131.9, 129.9, 129.7, 128.1, 122.8, 38.8, 25.8, 22.9, 17.8. HRMS (ESI)  $m/z$  calcd for  $\text{C}_{13}\text{H}_{15}\text{BrO}$  ( $\text{M}+\text{H}$ ) $^+$  : 289.0203, found: 289.0201.

**5-Methyl-1-(5-methylfuran-2-yl)hex-4-en-1-one (3j):** Purified by silica-gel column

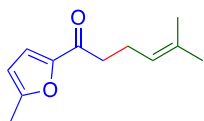

chromatography using ethyl acetate/hexane (1:99) mixture as eluent.

Colorless liquid. Yield: 39 mg, 42% . IR (DCM): 2924, 1674, 1516, 1456, 1375, 1026, 796  $\text{cm}^{-1}$ .  $^1\text{H}$  NMR (400 MHz,  $\text{CDCl}_3$ ):  $\delta$  7.09 (d,  $J = 3.4$  Hz, 1H, ArCH), 6.15-6.14 (m, 1H, ArCH), 5.17-5.13 (m, 1H, Olefinic CH), 2.78 (t,  $J = 7.6$  Hz, 2H,  $\text{CH}_2$ ), 2.42-2.37 (m, 5H,  $\text{CH}_2$  & Ar $\text{CH}_3$ ), 1.69 (s, 3H,  $\text{CH}_3$ ), 1.64 (s, 3H,  $\text{CH}_3$ ).  $^{13}\text{C}$  NMR (101 MHz,  $\text{CDCl}_3$ ):  $\delta$  188.7, 157.7, 151.6, 132.9, 122.9, 119.1, 108.9, 38.4, 25.8, 23.4, 17.8, 14.2. HRMS (ESI)  $m/z$  calcd for  $\text{C}_{12}\text{H}_{16}\text{O}_2$  ( $\text{M}+\text{H}$ ) $^+$  : 215.1048, found: 215.1054.

**5-Methyl-1-(1-methyl-1H-pyrrol-2-yl)hex-4-en-1-one (3k):** Purified by silica-gel column

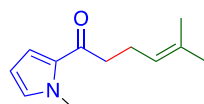

chromatography using ethyl acetate/hexane (3:97) mixture as eluent.

Colorless liquid. Yield: 84 mg, 89% . IR (DCM): 3446, 1700, 1683, 1558, 1456, 1418, 1274, 764, 749  $\text{cm}^{-1}$ .  $^1\text{H}$  NMR (400 MHz,  $\text{CDCl}_3$ ):  $\delta$  6.87 (dd,  $J_1 = 4.1$  Hz,  $J_2 = 1.7$  Hz, 1H, ArCH), 6.71 (d,  $J = 2.1$  Hz, 1H, ArCH), 6.04 (dd,  $J_1 = 4.0$  Hz,  $J_2 = 2.5$  Hz, 1H, ArCH), 5.12-5.06 (m, 1H, olefinic CH), 3.86 (s, 3H, N- $\text{CH}_3$ ), 2.71 (d,  $J = 7.9$  Hz, 2H,  $\text{CH}_2$ ), 2.33-2.27 (m, 2H,  $\text{CH}_2$ ), 1.61 (s, 3H,  $\text{CH}_3$ ), 1.56 (s, 3H,  $\text{CH}_3$ ).  $^{13}\text{C}$  NMR (101 MHz,  $\text{CDCl}_3$ ):  $\delta$  191.2, 132.5, 130.8, 123.3, 119.0, 107.8, 39.2, 37.7, 25.7, 23.8, 17.7. HRMS (ESI)  $m/z$  calcd for  $\text{C}_{12}\text{H}_{17}\text{NO}$  ( $\text{M}+\text{H}$ ) $^+$  : 214.1207, found: 214.1213.

**5-Methyl-1-(thiophen-2-yl)hex-4-en-1-one (3l):** Purified by silica-gel column

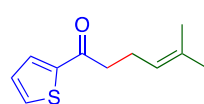

chromatography using ethyl acetate/hexane (2:98) mixture as eluent.

Colorless liquid. Yield: 58 mg, 60% . IR (DCM): 2925, 1661, 1519, 1416, 1354, 1233, 1062, 854  $\text{cm}^{-1}$ .  $^1\text{H}$  NMR (400 MHz,  $\text{CDCl}_3$ ):  $\delta$  7.63 (dd,  $J_1 = 3.7$  Hz,  $J_2 = 0.8$  Hz, 1H, ArCH), 7.54 (dd,  $J_1 = 4.9$  Hz,  $J_2 = 0.8$  Hz, 1H, ArCH), 7.05 (dd,  $J_1 = 4.8$  Hz,  $J_2 = 3.9$  Hz, 1H, ArCH), 5.11-5.07 (m, 1H, Olefinic CH), 2.85 (t,  $J = 7.5$  Hz, 2H,  $\text{CH}_2$ ), 2.35 (q,  $J = 7.4$  Hz, 2H,  $\text{CH}_2$ ), 1.61 (s, 3H,  $\text{CH}_3$ ), 1.56 (s, 3H,  $\text{CH}_3$ ).  $^{13}\text{C}$  NMR (101 MHz,  $\text{CDCl}_3$ ):  $\delta$  193.1, 144.5,

133.4, 133.1, 131.8, 128.1, 122.8, 39.6, 25.8, 23.4, 17.8. HRMS (ESI)  $m/z$  calcd for  $C_{11}H_{14}OS(M+H)^+$ : 217.0648, found: 217.0658.

**5-Methyl-1-(1-methyl-1H-indol-2-yl)hex-4-en-1-one (3m):** Purified by silica-gel column

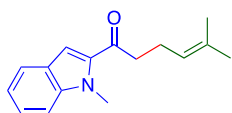

chromatography using ethyl acetate/hexane (5:95) mixture as eluent.

Colorless liquid. Yield: 82 mg, 68% . IR (DCM): 3442, 1695, 1576, 1456,

1539, 1506, 1456, 776  $cm^{-1}$ .  $^1H$  NMR (400 MHz,  $CDCl_3$ ):  $\delta$  8.34-8.31 (m, 1H, ArCH), 7.64 (s, 1H, ArCH), 7.27-7.22 (m, 3H, ArCH), 5.15 (t,  $J = 7.2$  Hz, 1H, Olefinic CH), 3.76 (s, 3H, N- $CH_3$ ), 2.80 (dd,  $J_1 = 8.5$  Hz,  $J_2 = 6.8$  Hz, 2H,  $CH_2$ ), 2.41 (t,  $J = 7.6$  Hz, 2H,  $CH_2$ ), 1.64-1.59 (m, 6H,  $CH_3$ ).  $^{13}C$  NMR (101 MHz,  $CDCl_3$ ):  $\delta$  195.4, 135.3, 126.4, 123.5, 123.3, 122.7, 122.6, 116.6, 109.6, 40.0, 33.5, 25.8, 23.7, 17.8. HRMS (ESI)  $m/z$  calcd for  $C_{16}H_{19}NO (M+H)^+$ : 264.1364, found: 264.1375.

**5-Methyl-1-(pyridin-3-yl)hex-4-en-1-one (3n):** Purified by silica-gel column

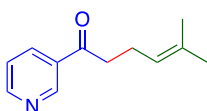

chromatography using ethyl acetate/hexane (1:99) mixture as eluent.

Colorless liquid. Yield: 35 mg, 37% . IR (DCM):  $^1H$  NMR (400 MHz,

$CDCl_3$ ):  $\delta$  9.09 (d,  $J = 2.2$  Hz, 1H, ArCH), 8.70 (dd,  $J_1 = 4.7$  Hz,  $J_2 = 1.6$  Hz, 1H, ArCH), 8.16 (d,  $J = 7.9$  Hz, 1H, ArCH), 7.34 (dd,  $J_1 = 8.0$  Hz,  $J_2 = 4.8$  Hz, 1H, ArCH), 5.15-4.95 (m, 1H, Olefinic CH), 2.94 (t,  $J = 7.4$  Hz, 2H,  $CH_2$ ), 2.37 (d,  $J = 7.4$  Hz, 2H,  $CH_2$ ), 1.62 (s, 3H,  $CH_3$ ), 1.56 (s, 3H,  $CH_3$ ).  $^{13}C$  NMR (101 MHz,  $CDCl_3$ ):  $\delta$  198.9, 153.4, 149.7, 135.4, 123.7, 122.5, 39.1, 29.8, 25.8, 22.7, 17.8, 14.2. HRMS (ESI)  $m/z$  calcd for  $C_{12}H_{15}NO (M+H)^+$ : 190.1237, found: 190.1226.

**5-Methyl-1-(quinolin-3-yl)hex-4-en-1-one (3o):** Purified by silica-gel column

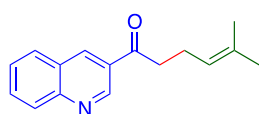

chromatography using ethyl acetate/hexane (5:95) mixture as eluent.

Colorless liquid. Yield: 72 mg, 60% . IR (DCM): 3446, 2923, 1683,

1616, 1436, 1375, 1126, 949, 751  $cm^{-1}$ .  $^1H$  NMR (400 MHz,  $CDCl_3$ ):  $\delta$  9.44 (s, 1H, ArCH),

8.72 (s, 1H, ArCH), 8.17 (d,  $J = 8.4$  Hz, 1H, ArCH), 7.95 (d,  $J = 8.2$  Hz, 1H, ArCH), 7.85 (t,  $J = 7.7$  Hz, 1H, ArCH), 7.64 (t,  $J = 7.5$  Hz, 1H, ArCH), 5.24-5.20 (m, 1H, Olefinic CH), 3.14 (t,  $J = 7.4$  Hz, 2H, CH<sub>2</sub>), 2.51 (q,  $J = 7.3$  Hz, 2H, CH<sub>2</sub>), 1.71 (s, 3H, CH<sub>3</sub>), 1.67 (s, 3H, CH<sub>3</sub>). <sup>13</sup>C NMR (101 MHz, CDCl<sub>3</sub>) δ 198.9, 149.9, 149.3, 137.1, 133.4, 132.0, 129.6, 129.4, 129.3, 127.6, 127.0, 122.6, 39.2, 25.8, 22.9, 17.9. HRMS (ESI)  $m/z$  calcd for C<sub>16</sub>H<sub>17</sub>O (M+H)<sup>+</sup> : 240.1388, found: 240.1399.

**5-Methyl-1-(naphthalen-2-yl)hex-4-en-1-one (3p):** <sup>1</sup> Purified by silica-gel column

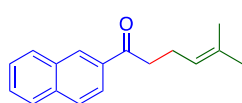

chromatography using ethyl acetate/hexane (1:99) mixture as eluent.

Colorless liquid. Yield: 77 mg, 65%. IR (DCM): 2966, 1700, 1456, 1374,

1181, 1123, 862, 747 cm<sup>-1</sup>. <sup>1</sup>H NMR (400 MHz, CDCl<sub>3</sub>) δ 8.40 (s, 1H, ArCH), 7.99-7.94 (m, 1H, ArCH), 7.89-7.87 (m, 1H, ArCH), 7.83-7.79 (m, 2H, ArCH), 7.54-7.45 (m, 2H, ArCH), 5.19-5.11 (m, 1H, olefinic CH), 3.06 (t, 2H, CH<sub>2</sub>), 2.41 (q,  $J = 7.4$  Hz, 2H, CH<sub>2</sub>), 1.63 (s, 3H, CH<sub>3</sub>), 1.58 (s, 3H, CH<sub>3</sub>). <sup>13</sup>C NMR (101 MHz, CDCl<sub>3</sub>): δ 200.1, 135.6, 134.4, 132.9, 132.6, 129.7, 129.6, 128.4, 128.4, 127.8, 126.8, 124.0, 123.0, 38.9, 25.8, 23.1, 17.8. HRMS (ESI)  $m/z$  calcd for C<sub>17</sub>H<sub>18</sub>O (M+H)<sup>+</sup> : 261.1255, found: 261.1264.

**1-(4a,10-Dihydroanthracen-9-yl)-5-methylhex-4-en-1-one (3q):** Purified by silica-gel

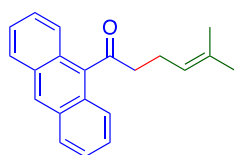

column chromatography using ethyl acetate/hexane (2:98) mixture as

eluent. Colorless liquid. Yield: 109 mg, 76% . IR (DCM): 2926, 1699,

1674, 1331, 1269, 1109, 936, 889, 735 cm<sup>-1</sup>. <sup>1</sup>H NMR (400 MHz, CDCl<sub>3</sub>):

δ 8.38 (s, 1H), 7.94-7.90 (m, 2H, ArCH), 7.73-7.71 (m, 2H, ArCH), 7.42-7.38 (m, 4H, ArCH), 5.15-5.14 (m, 1H, Olefinic CH), 3.01 (q,  $J_1 = 8.6$  Hz,  $J_2 = 8.0$  Hz, 2H, CH<sub>2</sub>), 2.50 (q,  $J = 7.4$  Hz, 2H, CH<sub>2</sub>), 1.62 (s, 3H, CH<sub>3</sub>), 1.57 (s, 3H, CH<sub>3</sub>). <sup>13</sup>C NMR (101 MHz, CDCl<sub>3</sub>): δ 210.4, 136.8, 133.3, 131.2, 128.9, 128.2, 127.1, 126.7, 125.5, 124.5, 122.7, 46.5, 25.8, 22.5, 17.9. HRMS (ESI)  $m/z$  calcd for C<sub>21</sub>H<sub>20</sub>O (M+H)<sup>+</sup> : 311.1411, found: 311.1425.

**(E)-5,9-Dimethyl-1-phenyldeca-4,8-dien-1-one (3r):** Purified by silica-gel column

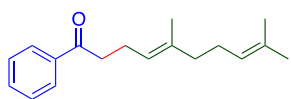

chromatography using ethyl acetate/hexane (1:99) mixture as an eluent. Colourless liquid. Yield: 69 mg, 54% . IR (DCM): 2976,1716,

1581, 1377, 1265, 1025, 896  $\text{cm}^{-1}$  .  $^1\text{H}$  NMR (400 MHz,  $\text{CDCl}_3$ ):  $\delta$  7.89 (d,  $J = 7.9$  Hz, 2H, ArCH), 7.50-7.46 (m, 1H, ArCH), 7.38 (t,  $J = 7.7$  Hz, 2H, ArCH), 5.12 (t,  $J = 7.2$  Hz, 1H, Olefinic CH), 5.03-4.99 (m, 1H, Olefinic CH), 2.93 (t,  $J = 7.5$  Hz, 2H,  $\text{CH}_2$ ), 2.37 (q,  $J = 7.4$  Hz, 2H,  $\text{CH}_2$ ), 1.95 (td,  $J_1 = 18.1$  Hz,  $J_2 = 10.4$  Hz, 4H,  $\text{CH}_2$ ), 1.56 (t,  $J = 14.8$  Hz, 9H,  $\text{CH}_3$ ).  $^{13}\text{C}$  NMR (101 MHz,  $\text{CDCl}_3$ ):  $\delta$  200.1, 137.1, 136.5, 133.0, 131.4, 128.6, 128.1, 124.3, 122.8, 39.8, 38.8, 26.7, 25.7, 23.0, 17.8, 16.1. HRMS (ESI)  $m/z$  calcd for  $\text{C}_{20}\text{H}_{16}\text{O}(\text{M}+\text{H})^+$  : 283.2058, found: 283.2090.

### Spectral Data of Functionalized Compounds Prepared from $\alpha$ -Prenylated Ketones:

**5-Methyl-1-phenylhex-4-en-1-ol (4a):** Purified by silica-gel column chromatography using

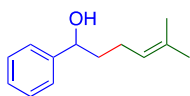

ethyl acetate/hexane (2:98) mixture as eluent. Colourless liquid. Yield: 76 mg, 80% .  $^1\text{H}$  NMR (400 MHz,  $\text{CDCl}_3$ ):  $\delta$  7.27 (t,  $J = 6.2$  Hz, 4H, ArCH), 7.20

(dd,  $J_1 = 8.6$  Hz,  $J_2 = 4.3$  Hz, 1H, ArCH), 5.08-5.05 (m, 1H, Olefinic CH), 4.59 (t,  $J = 6.6$  Hz, 1H, CH), 1.98 (t,  $J = 7.2$  Hz, 2H,  $\text{CH}_2$ ), 1.81-1.65 (m, 3H,  $\text{CH}_2$  & OH), 1.62 (s, 3H,  $\text{CH}_3$ ), 1.51 (s, 3H,  $\text{CH}_3$ ).  $^{13}\text{C}$  NMR (101 MHz,  $\text{CDCl}_3$ ):  $\delta$  144.8, 132.4, 128.5, 127.5, 126.0, 123.9, 74.3, 39.1, 25.8, 24.6, 17.8.

**3,5-Dibromo-2,2-dimethyl-6-phenyl-3,4-dihydro-2H-pyran (4b):**<sup>2</sup> Purified by silica-gel

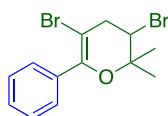

column chromatography using ethyl acetate/hexane (2:98) mixture as an eluent. Colorless liquid. Yield: 81 mg, 47%.  $^1\text{H}$  NMR (400 MHz,  $\text{CDCl}_3$ ):  $\delta$

7.49-7.38 (m, 2H, ArCH), 7.34-7.22 (m, 3H, ArCH), 4.13 (dd,  $J_1 = 9.1$  Hz,  $J_2 = 6.0$  Hz, 1H, CH), 3.06 (s, 1H,  $\text{CH}_2$ ), 2.94 (dd,  $J_1 = 17.5$  Hz,  $J_2 = 9.0$  Hz, 1H,  $\text{CH}_2$ ), 1.43 (d,  $J = 11.9$  Hz,

6H,  $CH_3$ ).  $^{13}C$  NMR (101 MHz,  $CDCl_3$ ):  $\delta$  148.59, 135.28, 129.17, 129.09, 127.99, 92.51, 77.96, 51.89, 40.95, 26.88, 20.66.

**(2-(2-Hydroxypropan-2-yl)cyclopropyl)(4-methoxyphenyl)methanone (4d):**<sup>3</sup> Purified by

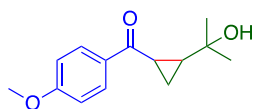

silica-gel column chromatography using ethyl acetate/hexane (2:98) mixture as an eluent. Colorless liquid. Yield: 84 mg, 73%.  $^1H$  NMR (400 MHz,  $CDCl_3$ ):  $\delta$  7.97 (d,  $J = 8.6$  Hz, 2H, ArCH), 6.88 (d,  $J = 8.6$  Hz, 2H, ArCH), 3.81 (s, 3H, ArOCH<sub>3</sub>), 2.68 (dt,  $J_1 = 8.4$  Hz,  $J_2 = 4.3$  Hz, 1H, CH), 1.70-1.65 (m, 1H, CH<sub>2</sub>), 1.44-1.41 (m, 1H, OH), 1.30 (dt,  $J_1 = 8.8$  Hz,  $J_2 = 4.3$  Hz, 1H, CH<sub>2</sub>), 1.25 (d,  $J = 4.0$  Hz, 6H, CH<sub>3</sub>), 1.11-1.07 (m, 1H, CH).  $^{13}C$  NMR (101 MHz,  $CDCl_3$ ):  $\delta$  198.7, 163.5, 131.0, 130.4, 113.8, 68.9, 55.6, 36.4, 29.9, 29.6, 20.7, 14.1.

**(E)-1-(4-Methoxyphenyl)-5-methylhex-4-en-1-one oxime (4e):**<sup>4</sup> Purified by silica-gel

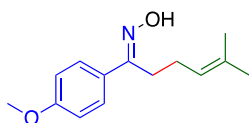

column chromatography using ethyl acetate/hexane (2:98) mixture as an eluent. White solid. Yield: 110 mg, 95%.  $^1H$  NMR (400 MHz,  $CDCl_3$ ):  $\delta$  9.50 (s, 1H, OH), 7.49 (d,  $J = 8.7$  Hz, 2H, ArCH), 6.84 (d,  $J = 8.7$  Hz, 2H, ArCH), 5.12 (t,  $J = 6.8$  Hz, 1H, ArCH), 3.76 (s, 3H, ArOCH<sub>3</sub>), 2.74 (t,  $J = 8.0$  Hz, 2H, CH<sub>2</sub>), 2.20 (q,  $J = 7.8$  Hz, 2H, CH<sub>2</sub>), 1.61 (s, 3H, CH<sub>3</sub>), 1.51 (s, 3H, CH<sub>3</sub>).  $^{13}C$  NMR (101 MHz,  $CDCl_3$ ):  $\delta$  159.6, 158.1, 131.8, 127.5, 126.8, 126.8, 122.5, 113.2, 113.1, 54.5, 25.7, 24.8, 24.1, 16.9.



## $^1\text{H}$ and $^{13}\text{C}$ NMR spectra of $\alpha$ -prenylated products:

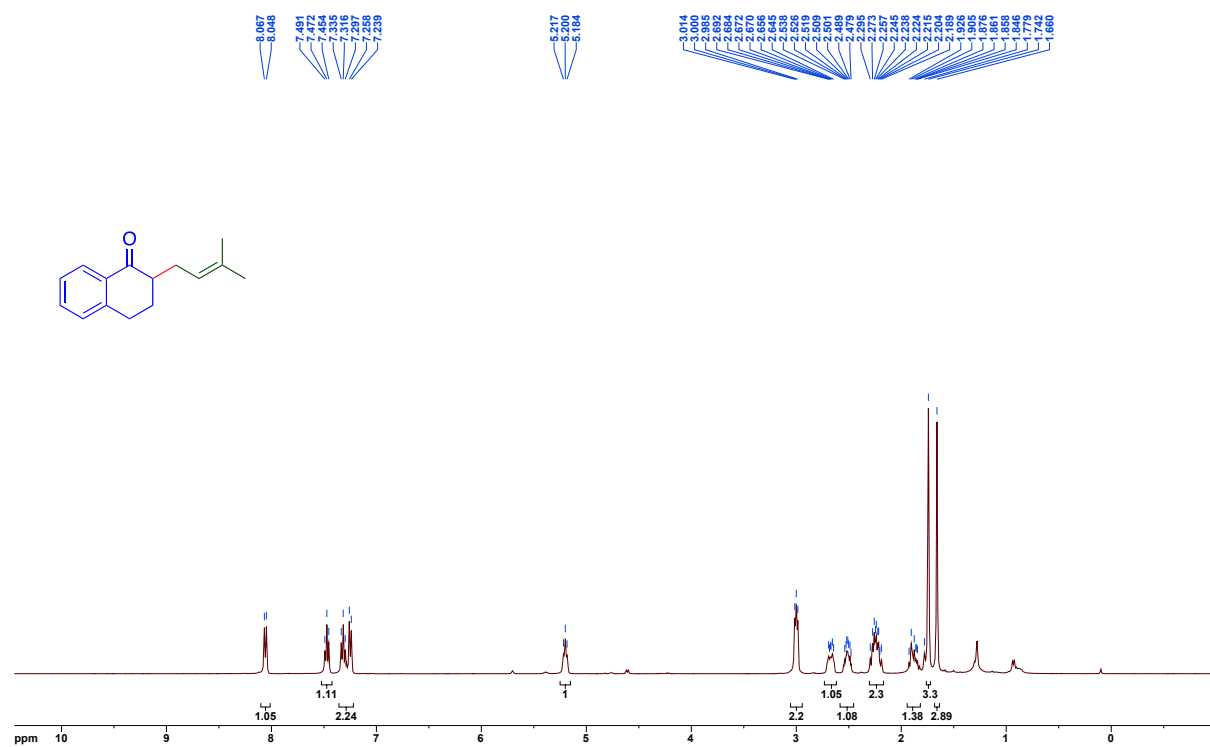

$^1\text{H}$  NMR spectrum of 2-(3-methylbut-2-en-1-yl)-3,4-dihydronaphthalen-1-one (**2a**, 400 MHz,  $\text{CDCl}_3$ )

$^{13}\text{C}$  NMR spectrum of 2-(3-methylbut-2-en-1-yl)-3,4-dihydronaphthalen-1-one (**2a**, 101 MHz,  $\text{CDCl}_3$ ):

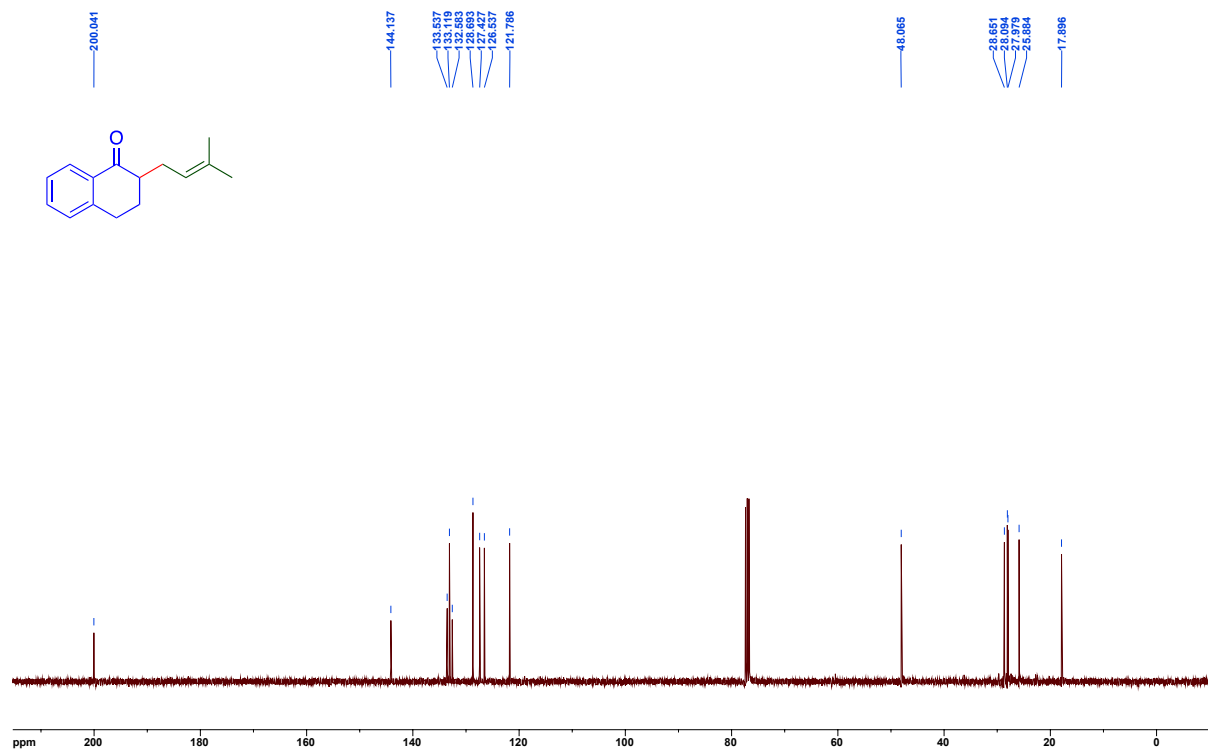

$^1\text{H}$  NMR spectrum of 5,7-dimethyl-2-(3-methylbut-2-en-1-yl)-3,4-dihydronaphthalen-1(2H)-one (**2b**, 400 MHz,  $\text{CDCl}_3$ )

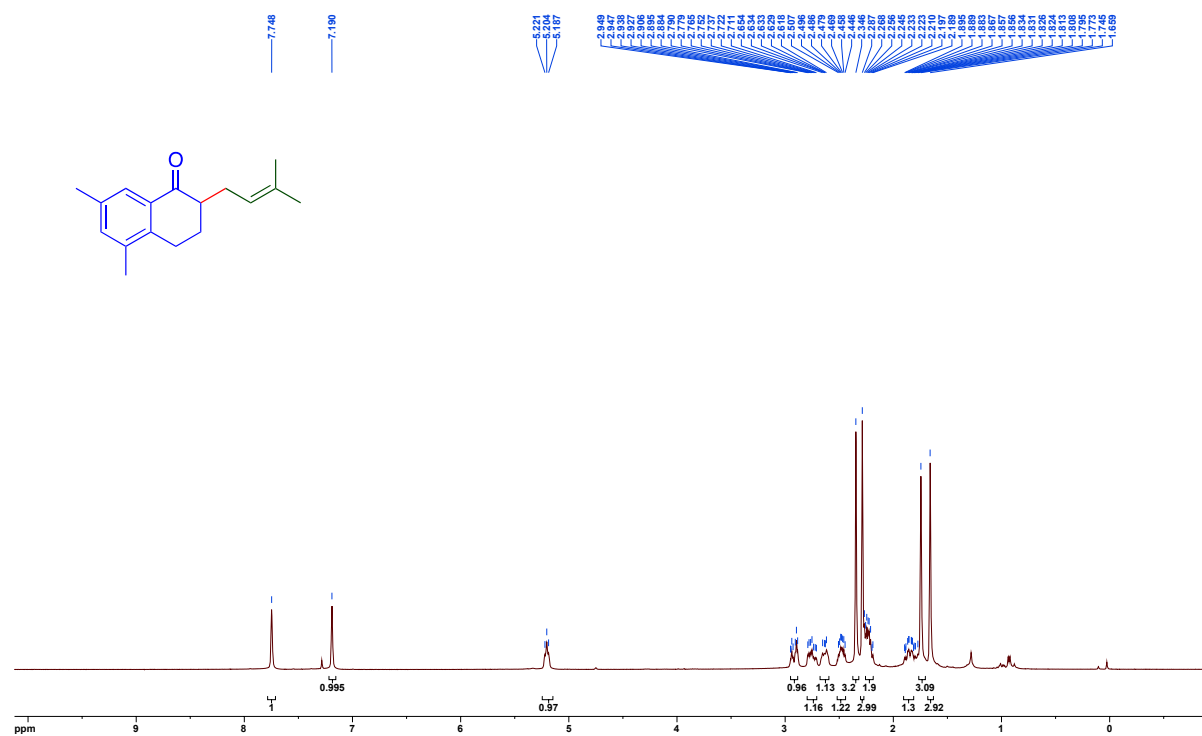

$^{13}\text{C}$  NMR spectrum of 5,7-dimethyl-2-(3-methylbut-2-en-1-yl)-3,4-dihydronaphthalen-1(2H)-one (**2b**, 101 MHz,  $\text{CDCl}_3$ ):

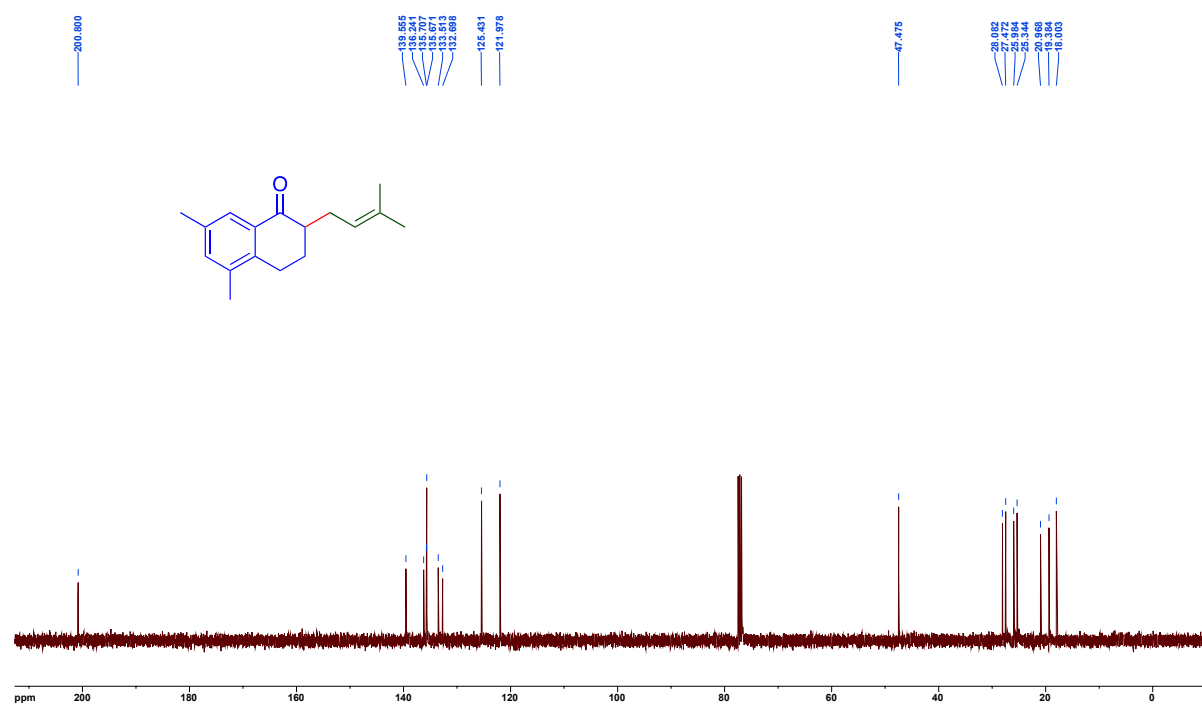

$^1\text{H}$  NMR spectrum of 4-methyl-2-(3-methylbut-2-en-1-yl)-3,4-dihydronaphthalen-1(2H)-one (**2c**, 400 MHz,  $\text{CDCl}_3$ )

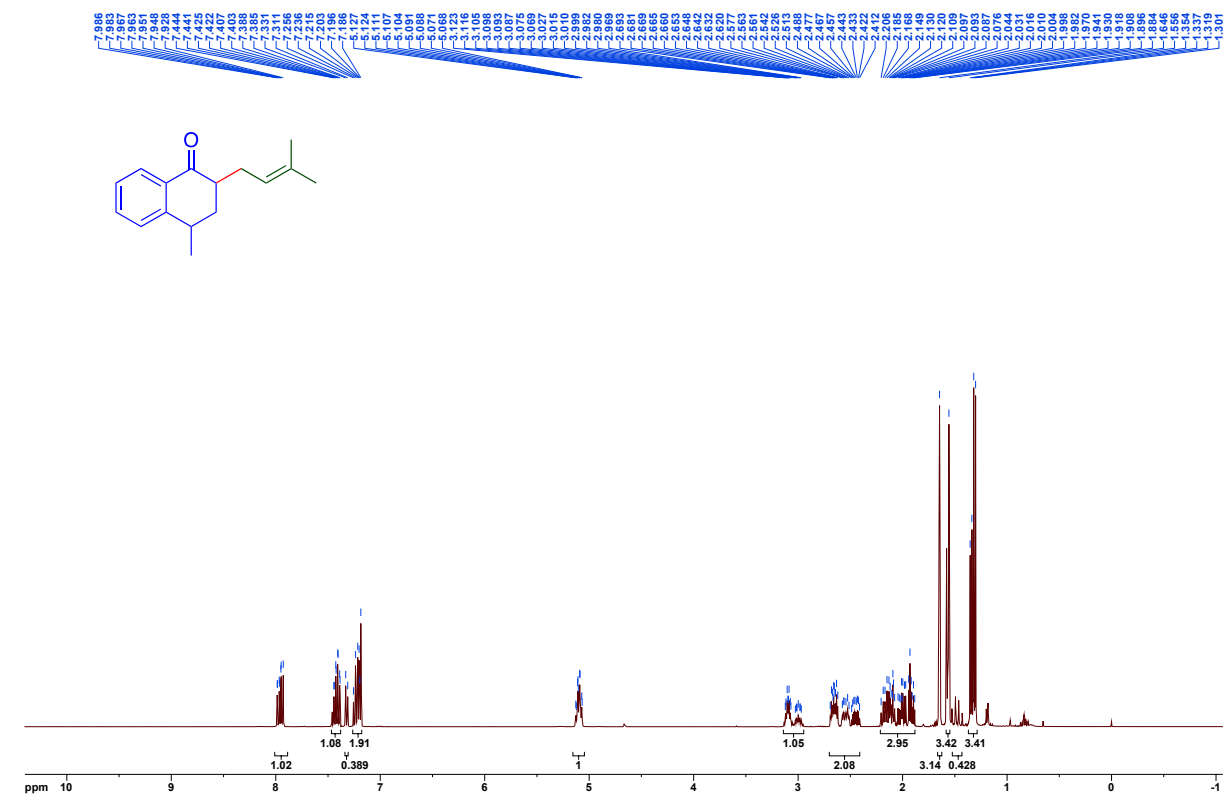

$^{13}\text{C}$  NMR spectrum of 4-methyl-2-(3-methylbut-2-en-1-yl)-3,4-dihydronaphthalen-1(2H)-one (**2c**, 101 MHz,  $\text{CDCl}_3$ ):

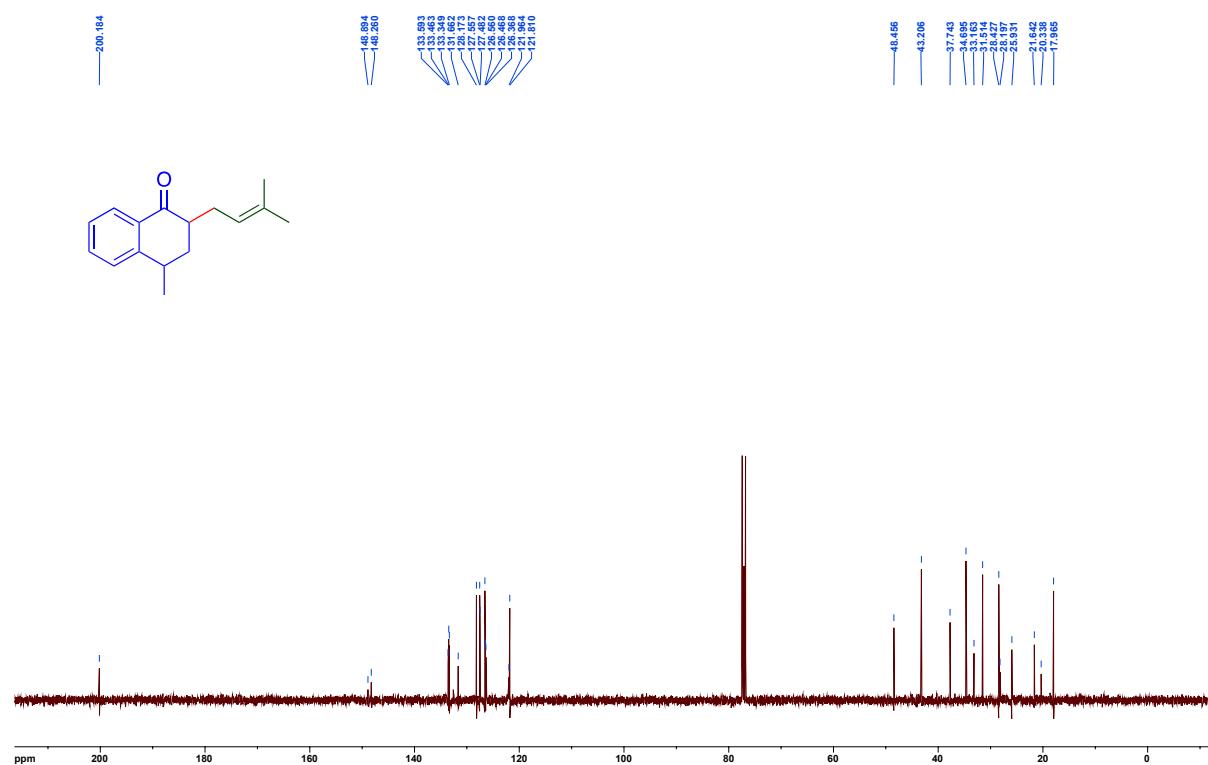

$^1\text{H}$  NMR spectrum of 6-methoxy-2-(3-methylbut-2-en-1-yl)-3,4-dihydronaphthalen-1(2H)-one (**2d**, 400 MHz,  $\text{CDCl}_3$ )

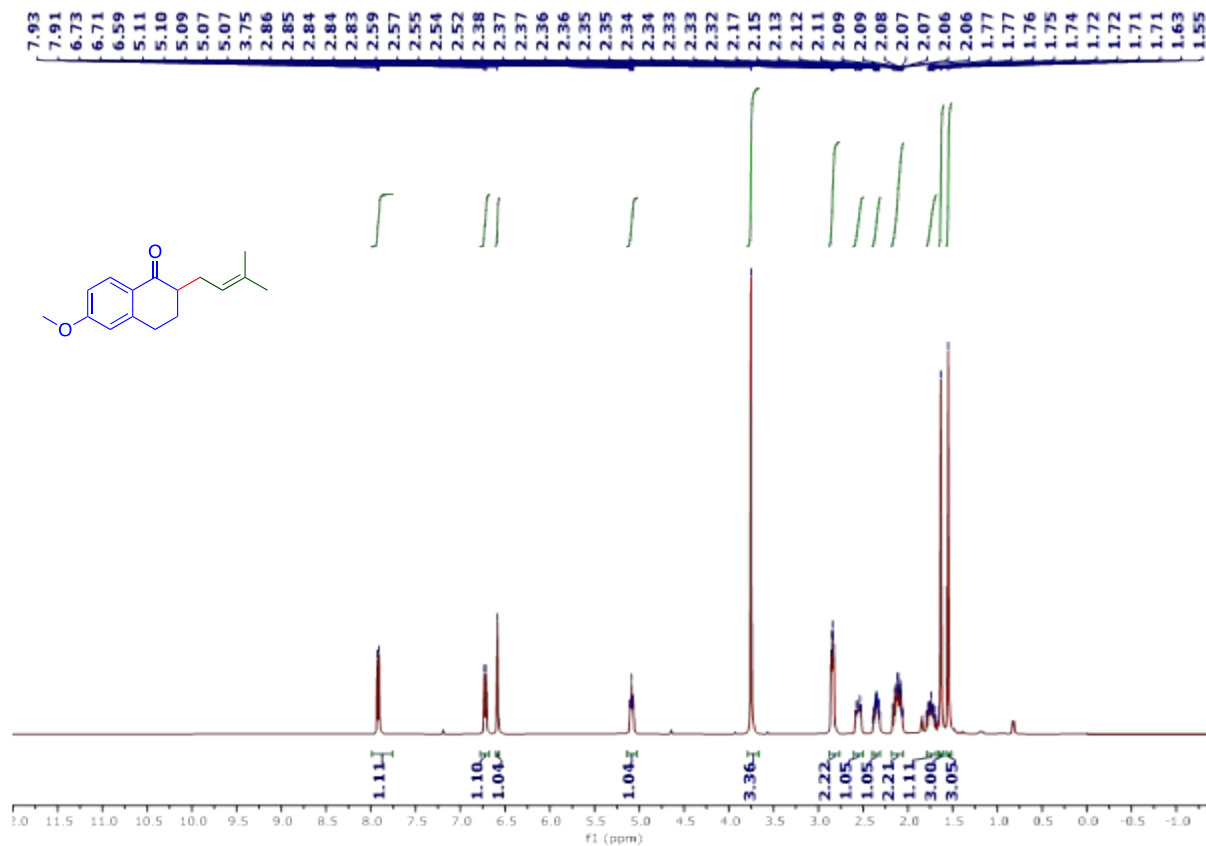

$^{13}\text{C}$  NMR spectrum of 6-methoxy-2-(3-methylbut-2-en-1-yl)-3,4-dihydronaphthalen-1(2H)-one (**2d**, 101 MHz,  $\text{CDCl}_3$ ):

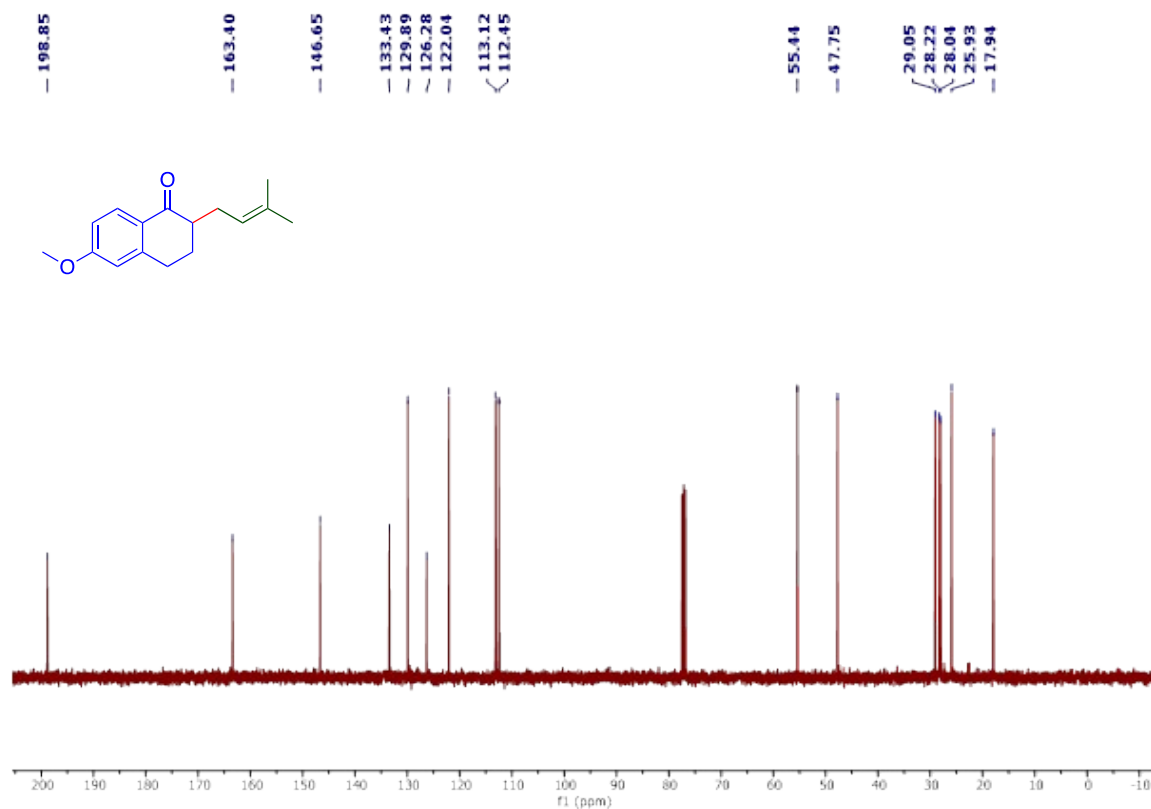

<sup>1</sup>H NMR spectrum of 5-(benzyloxy)-2-(3-methylbut-2-en-1-yl)-3,4-dihydronaphthalen-1(2H)-one (**2e**, 400 MHz, CDCl<sub>3</sub>)

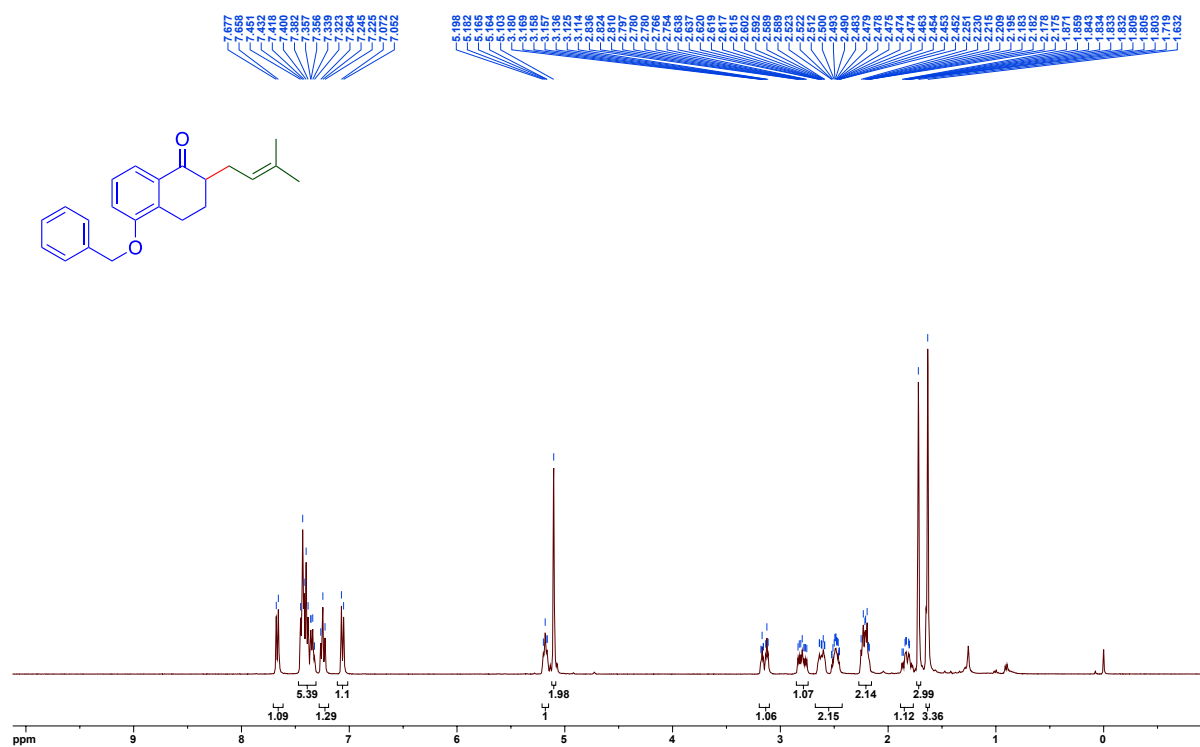

<sup>13</sup>C NMR spectrum of 5-(benzyloxy)-2-(3-methylbut-2-en-1-yl)-3,4-dihydronaphthalen-1(2H)-one (**2e**, 101 MHz, CDCl<sub>3</sub>):

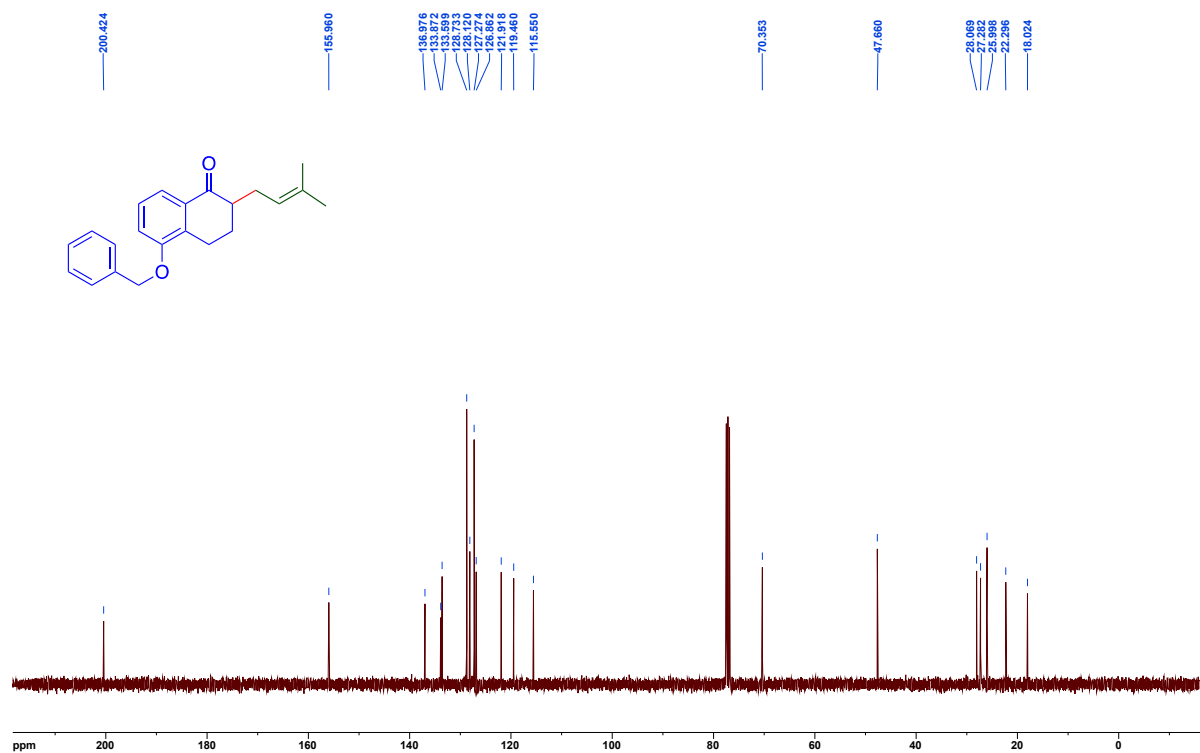

$^1\text{H}$  NMR spectrum of 7-bromo-2-(3-methylbut-2-en-1-yl)-3,4-dihydronaphthalen-1(2H)-one (**2f**, 400 MHz,  $\text{CDCl}_3$ )

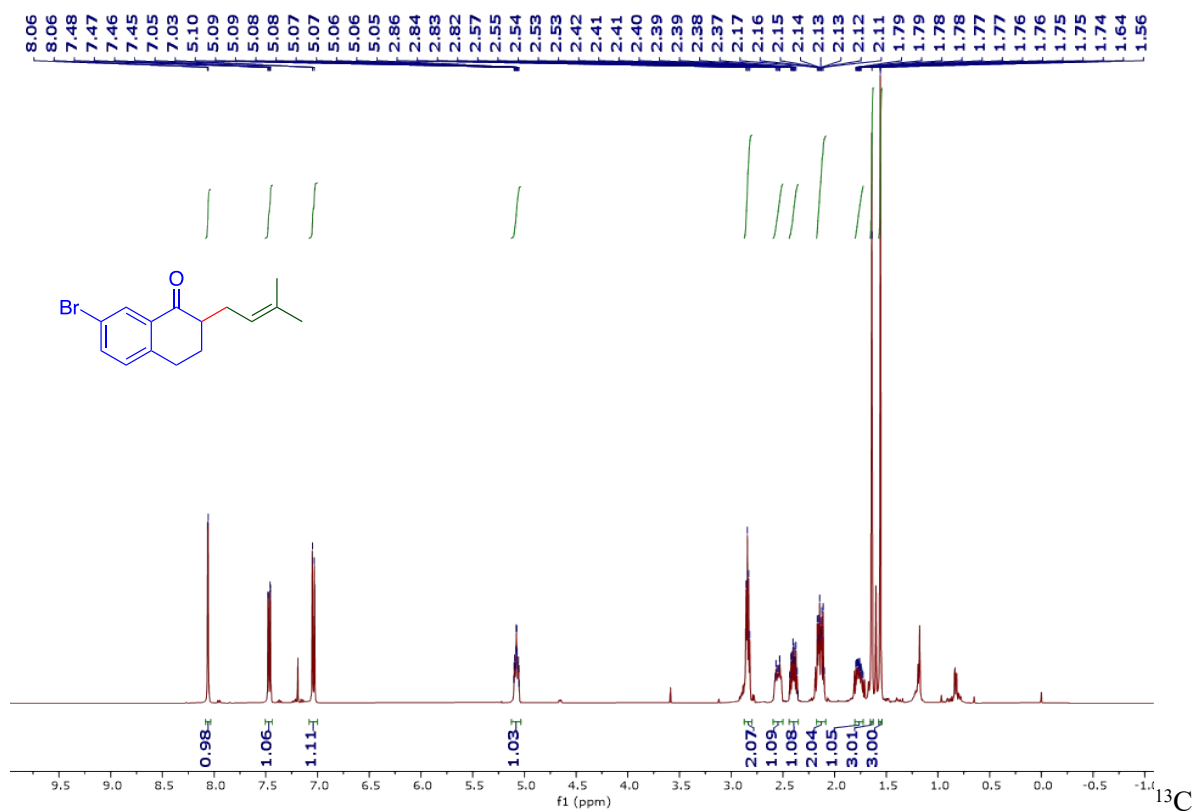

NMR spectrum of 7-bromo-2-(3-methylbut-2-en-1-yl)-3,4-dihydronaphthalen-1(2H)-one (**2f**, 101 MHz,  $\text{CDCl}_3$ ):

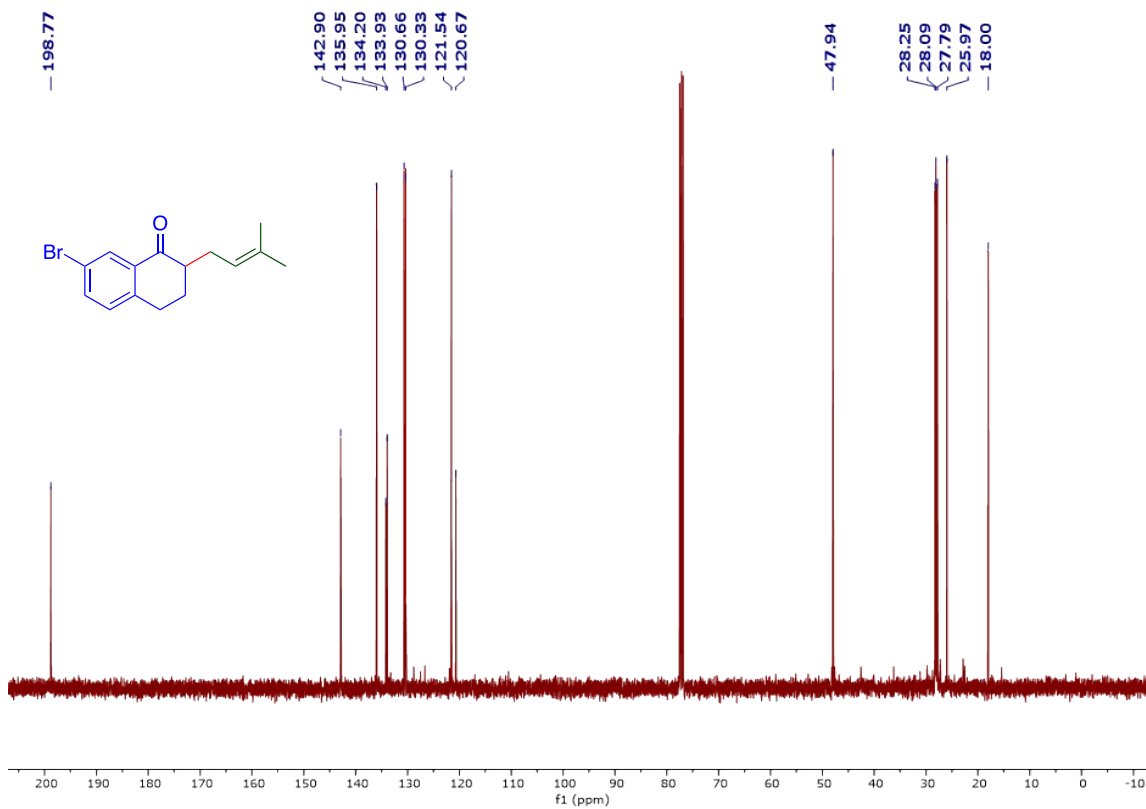

$^1\text{H}$  NMR spectrum of 4-(3,4-dichlorophenyl)-2-(3-methylbut-2-en-1-yl)-3,4-dihydronaphthalen-1(2H)-one (**2g**, 400 MHz,  $\text{CDCl}_3$ ):

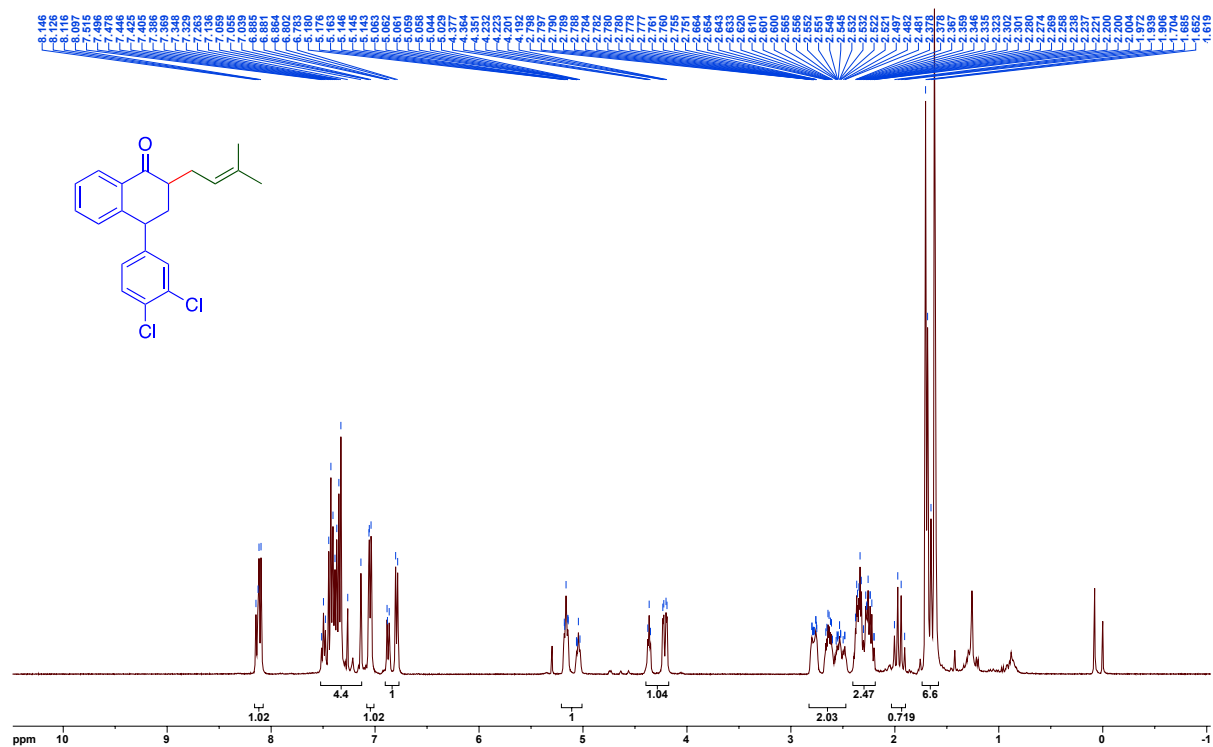

$^{13}\text{C}$  NMR spectrum of 4-(3,4-dichlorophenyl)-2-(3-methylbut-2-en-1-yl)-3,4-dihydronaphthalen-1(2H)-one (**2g**, 101 MHz,  $\text{CDCl}_3$ ):

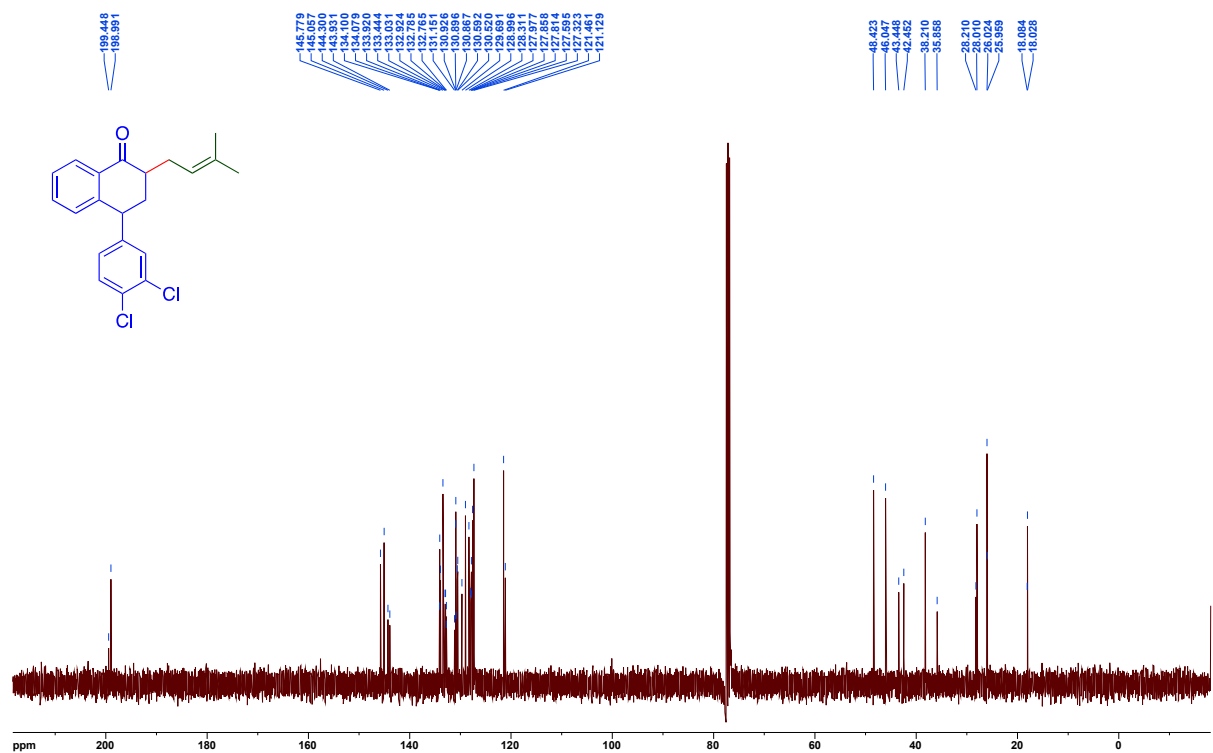





$^1\text{H}$  NMR spectrum of 3-(3-methylbut-2-en-1-yl)chroman-4-one (**2i**, 400 MHz,  $\text{CDCl}_3$ ):

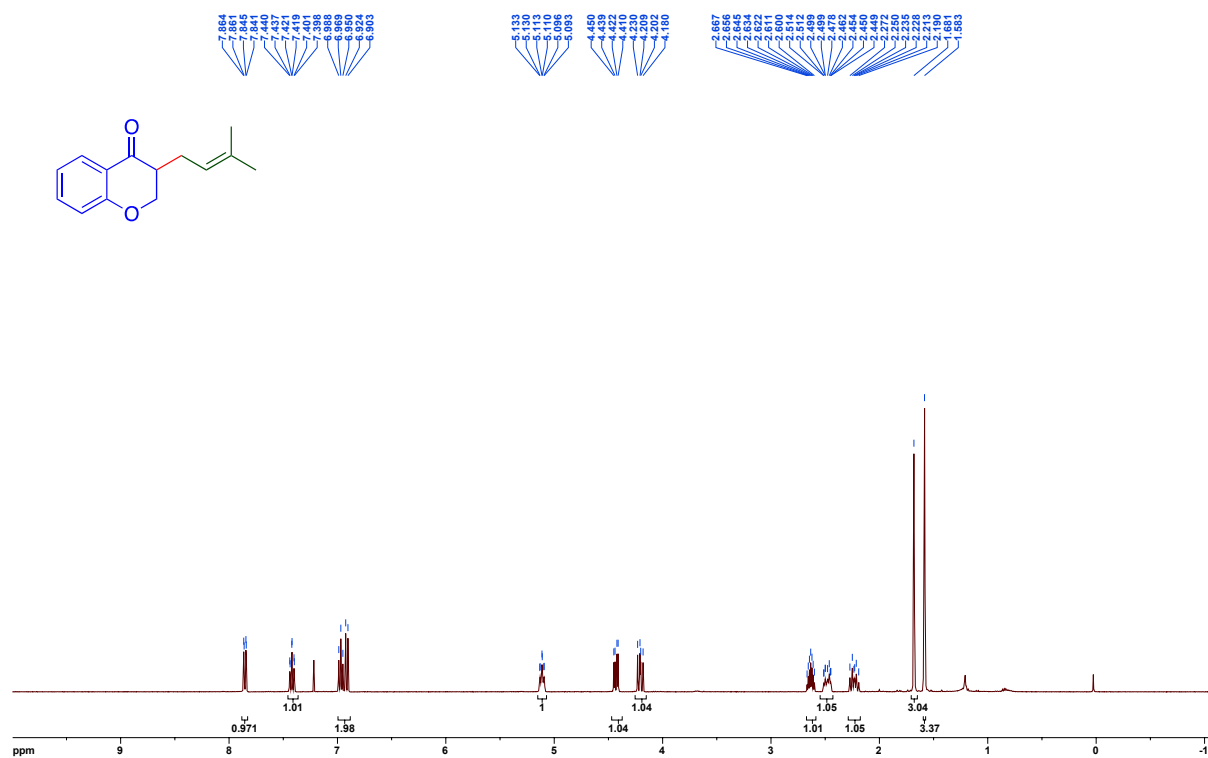

$^{13}\text{C}$  NMR spectrum of 3-(3-methylbut-2-en-1-yl)chroman-4-one (**2i**, 101 MHz,  $\text{CDCl}_3$ ):

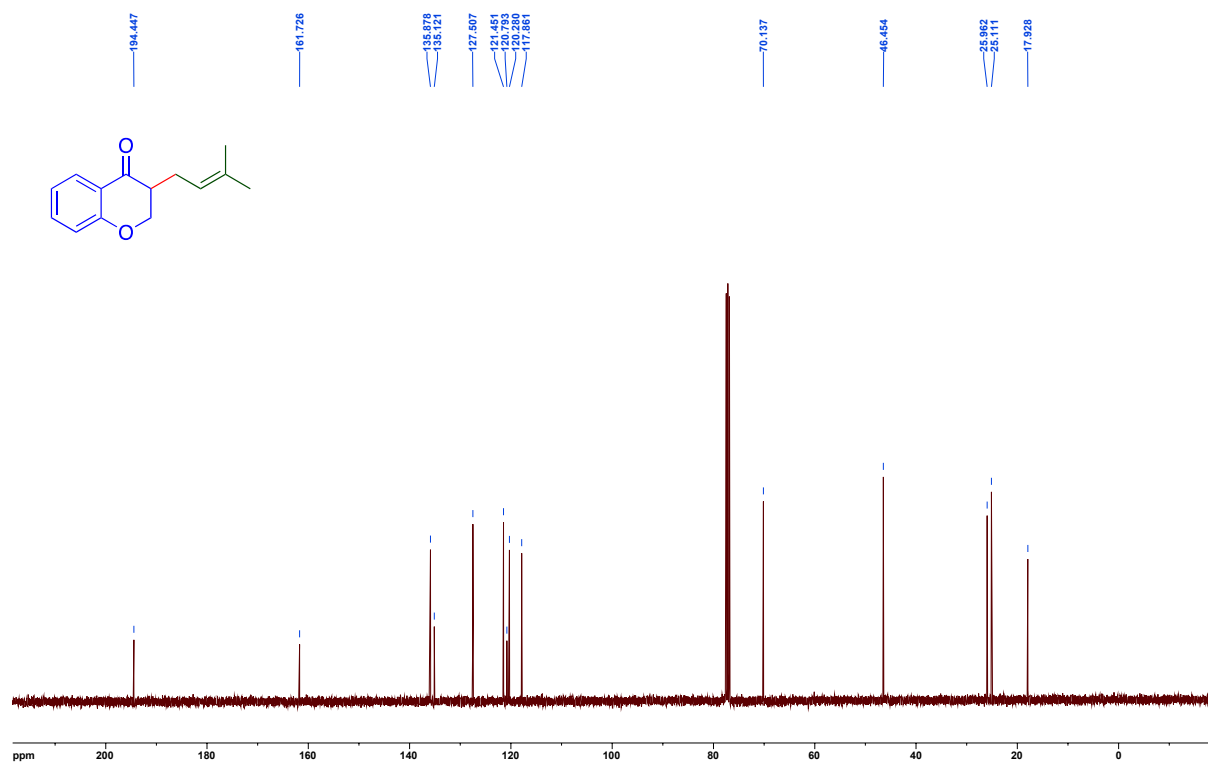

$^1\text{H}$  NMR spectrum of 6-amino-2-(3-methylbut-2-en-1-yl)-3,4-dihydronaphthalen-1(2H)-one (**2j**, 400 MHz,  $\text{CDCl}_3$ ) :

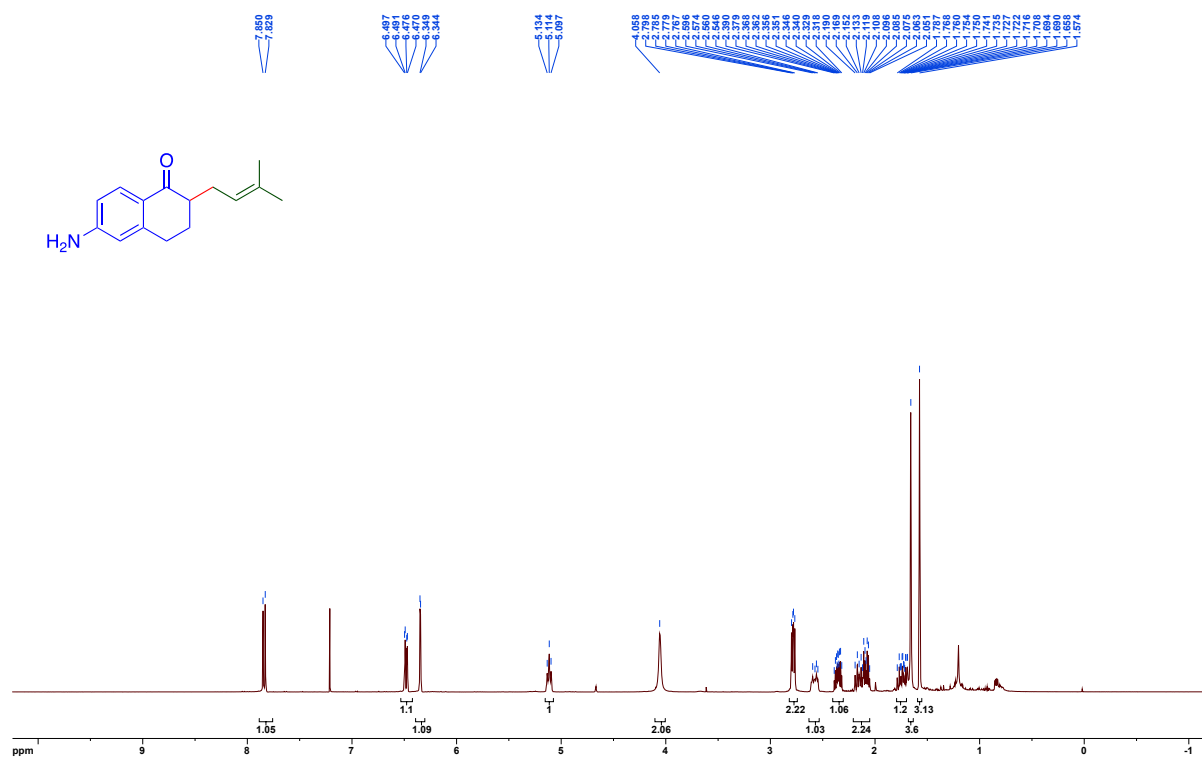

$^{13}\text{C}$  NMR spectrum of 6-amino-2-(3-methylbut-2-en-1-yl)-3,4-dihydronaphthalen-1(2H)-one (**2j**, 101 MHz,  $\text{CDCl}_3$ ):

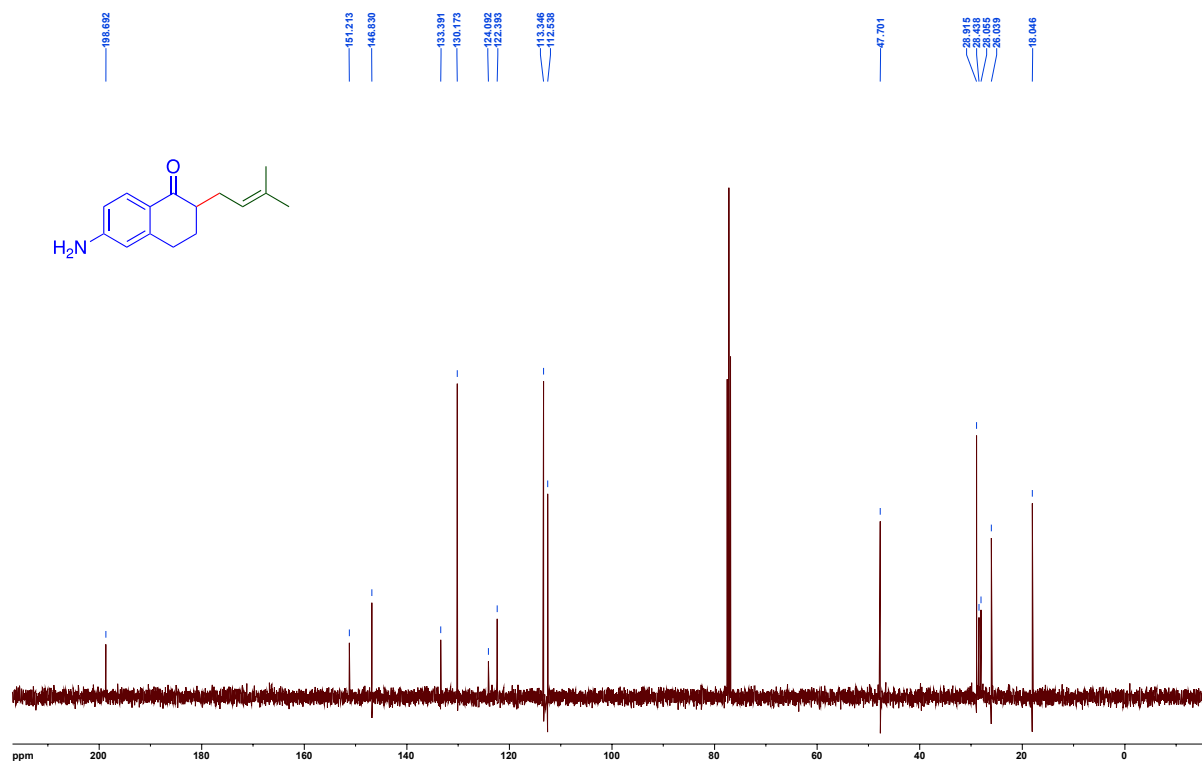

$^1\text{H}$  NMR spectrum of 2-(3-methylbut-2-en-1-yl)-6-((3-methylbut-2-en-1-yl)amino)-3,4-dihydronaphthalen-1(2H)-one (**2j'**, 400 MHz,  $\text{CDCl}_3$ ):

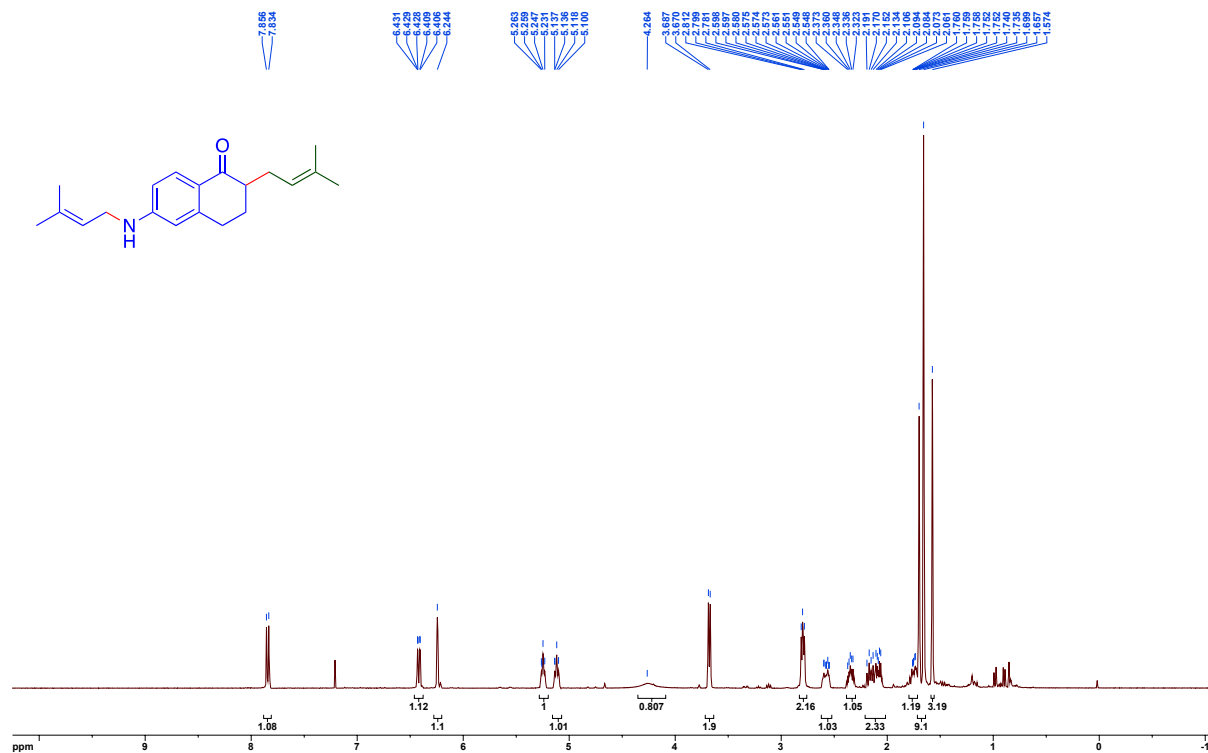

$^{13}\text{C}$  NMR spectrum of 2-(3-methylbut-2-en-1-yl)-6-((3-methylbut-2-en-1-yl)amino)-3,4-dihydronaphthalen-1(2H)-one (**2j'**, 101 MHz,  $\text{CDCl}_3$ ):

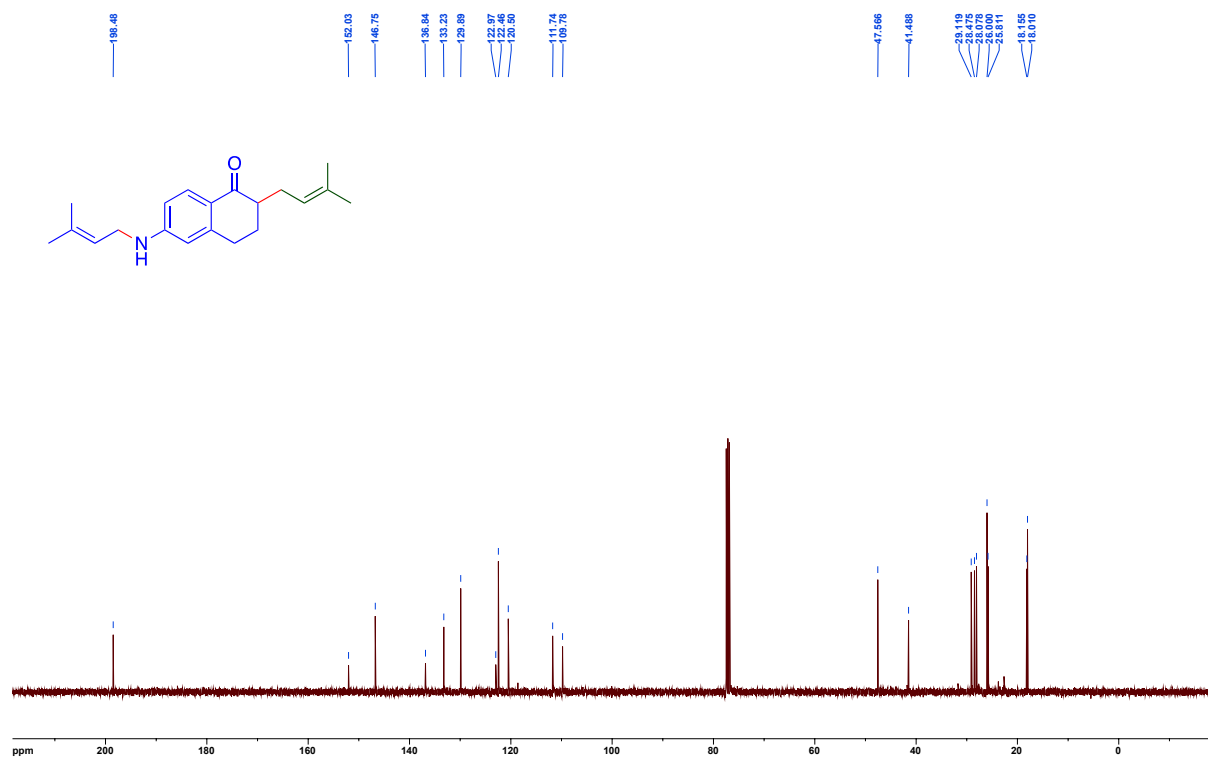

$^1\text{H}$  NMR spectrum of 2-(3-methylbut-2-en-1-yl)-2,3-dihydro-inden-1-one (**2k**, 400 MHz,  $\text{CDCl}_3$ ):

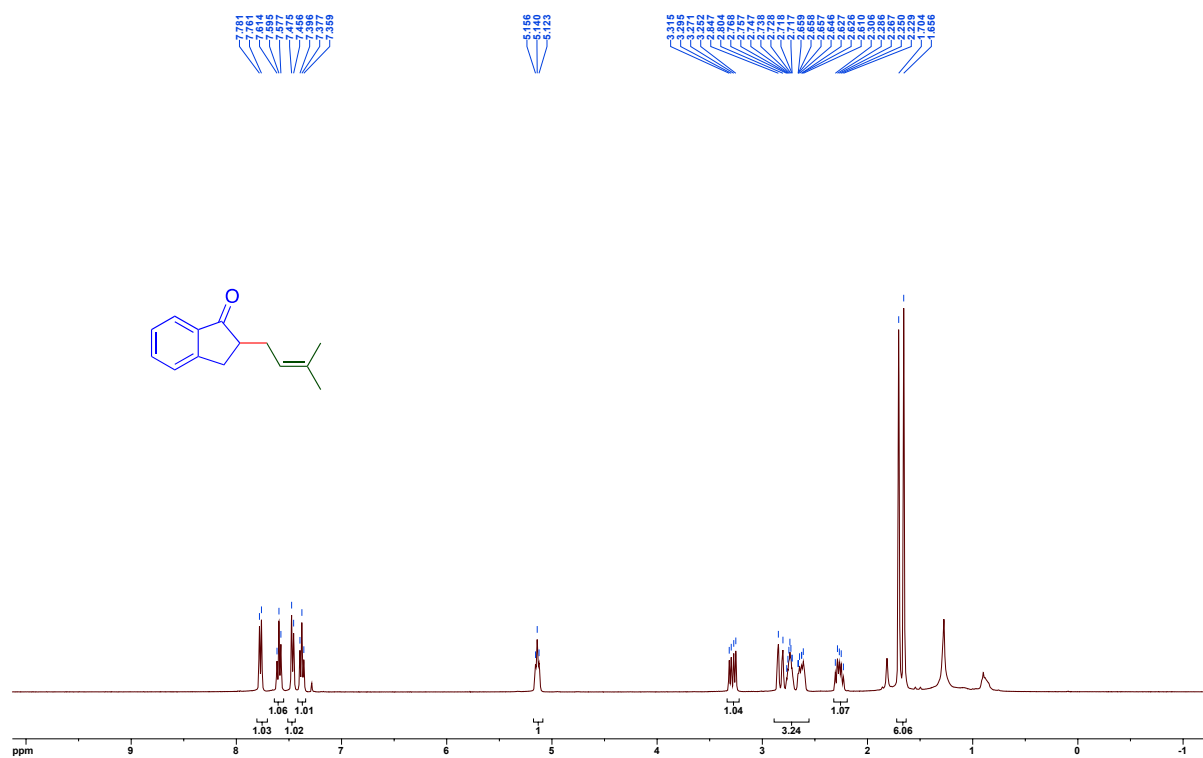

$^{13}\text{C}$  NMR spectrum of 2-(3-methylbut-2-en-1-yl)-2,3-dihydro-inden-1-one (**2k**, 101 MHz,  $\text{CDCl}_3$ ):

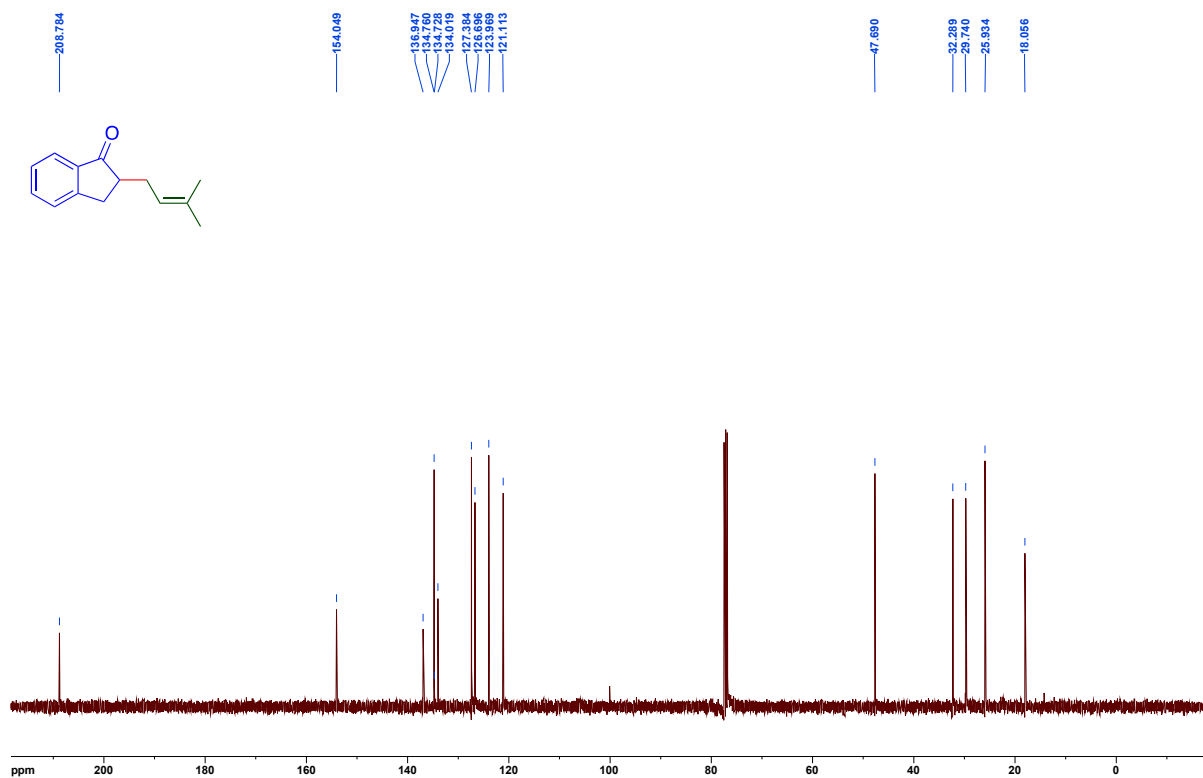

<sup>1</sup>H NMR spectrum of 5,6-dimethoxy-2-(3-methylbut-2-en-1-yl)-2,3-dihydro-1H-inden-1-one (**21**, 400 MHz, CDCl<sub>3</sub>):

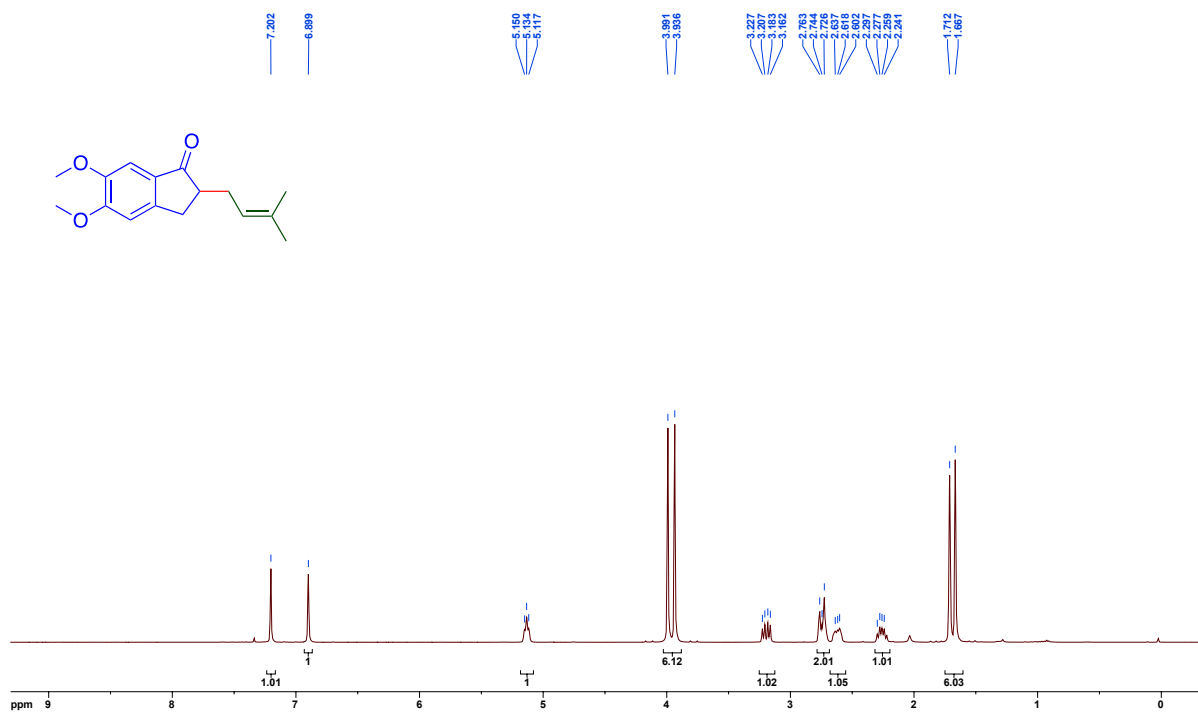

<sup>13</sup>C NMR spectrum of 5,6-dimethoxy-2-(3-methylbut-2-en-1-yl)-2,3-dihydro-1H-inden-1-one (**21**, 101 MHz, CDCl<sub>3</sub>):

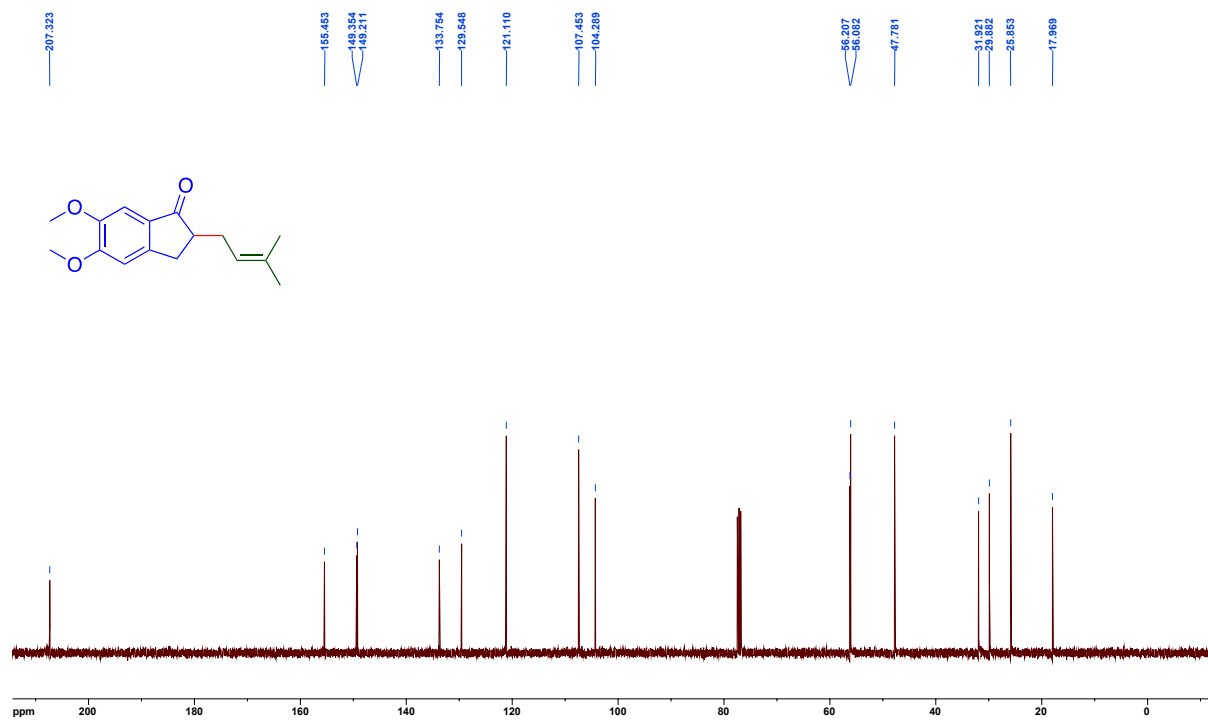

$^1\text{H}$  NMR spectrum of 6-(3-methylbut-2-en-1-yl)-6,7-dihydro-5H-indeno[5,6-d][1,3]dioxol-5-one (**2m**, 400 MHz,  $\text{CDCl}_3$ ):

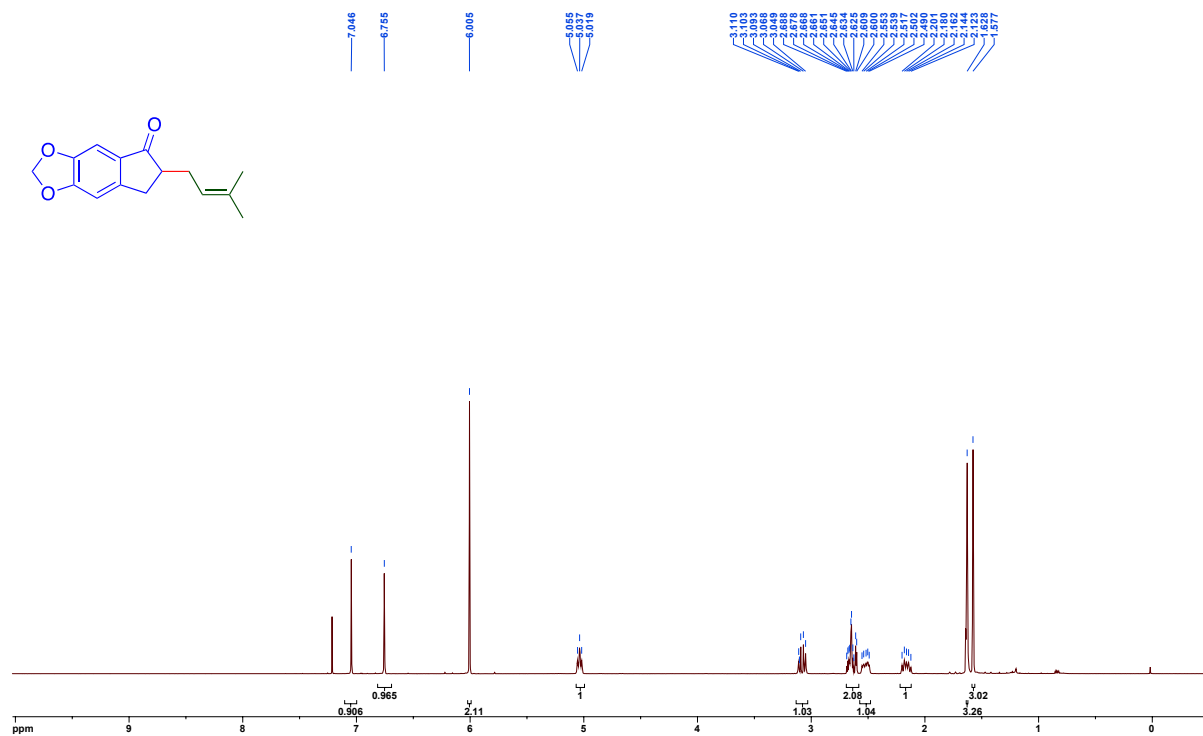

$^{13}\text{C}$  NMR spectrum of 6-(3-methylbut-2-en-1-yl)-6,7-dihydro-5H-indeno[5,6-d][1,3]dioxol-5-one (**2m**, 101 MHz,  $\text{CDCl}_3$ ):

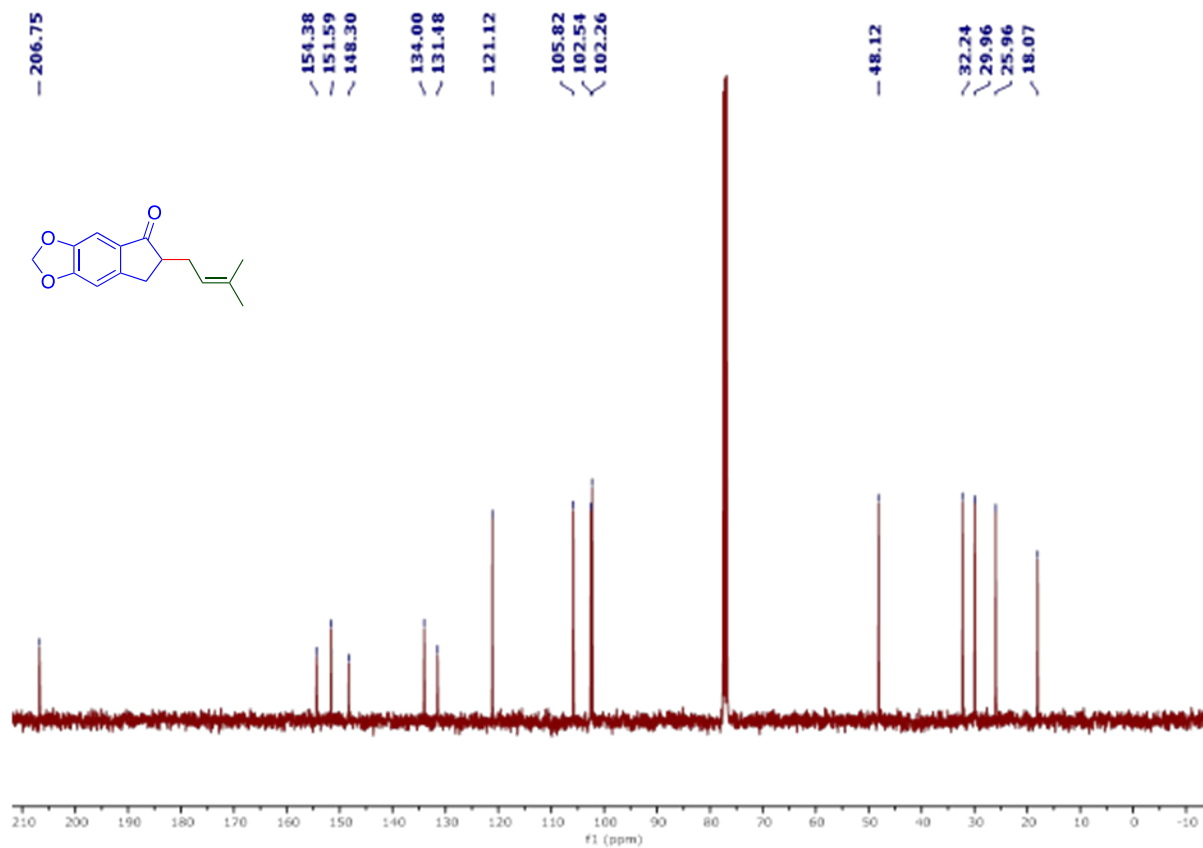



$^1\text{H}$  NMR spectrum of 2-(3-methylbut-2-en-1-yl)-3-phenyl-2,3-dihydro-1H-inden-1-one (**2n**, 400 MHz,  $\text{CDCl}_3$ ) :

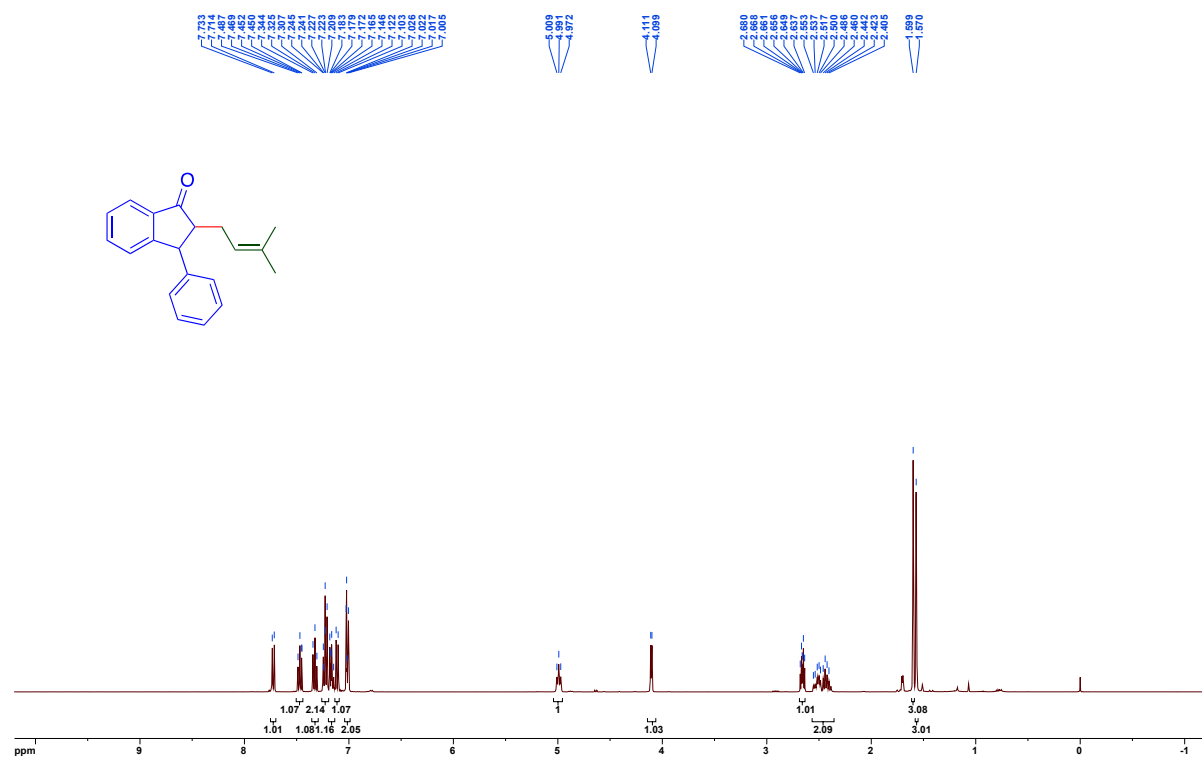

$^{13}\text{C}$  NMR spectrum of 2-(3-methylbut-2-en-1-yl)-3-phenyl-2,3-dihydro-1H-inden-1-one (**2n**, 101 MHz,  $\text{CDCl}_3$ ):

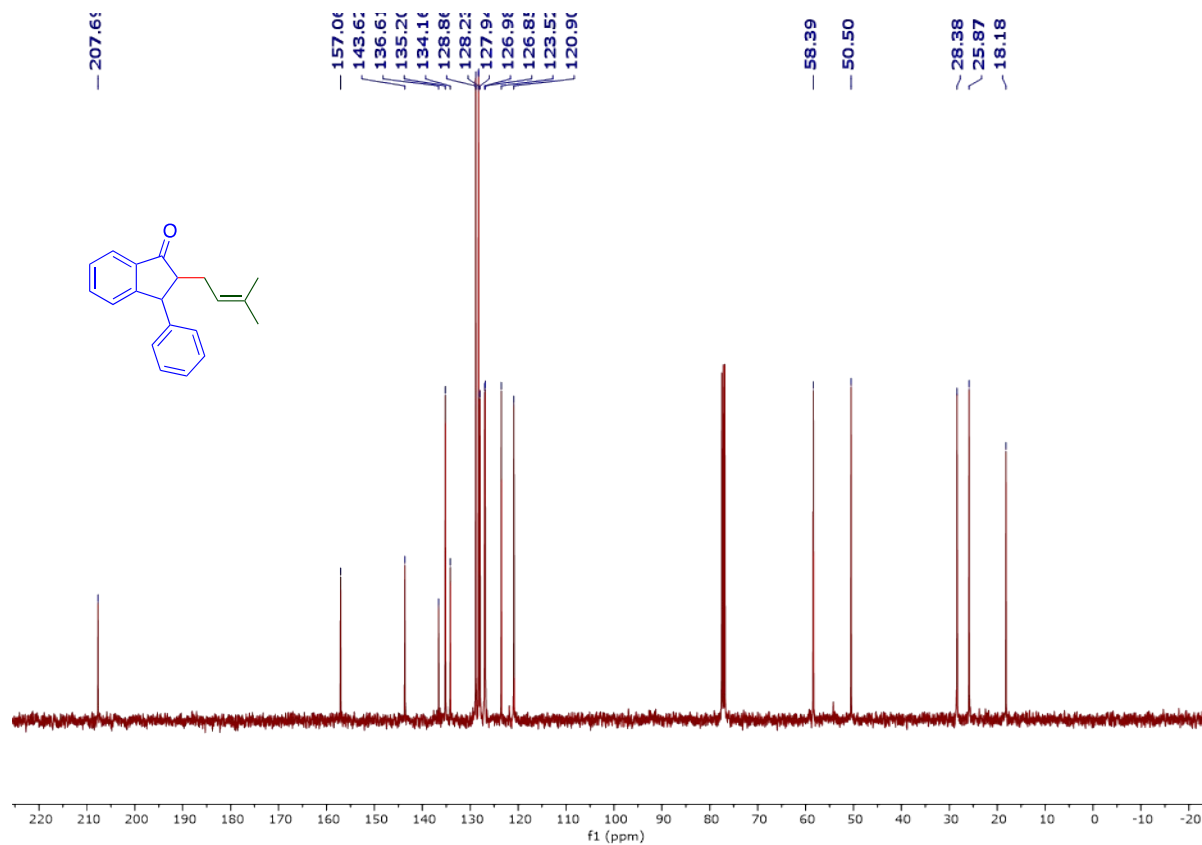

$^1\text{H}$  NMR spectrum of 2-(3-methylbut-2-en-1-yl)-4-(trifluoromethyl)-2,3-dihydro-1H-inden-1-one (**20**, 400 MHz,  $\text{CDCl}_3$ ):

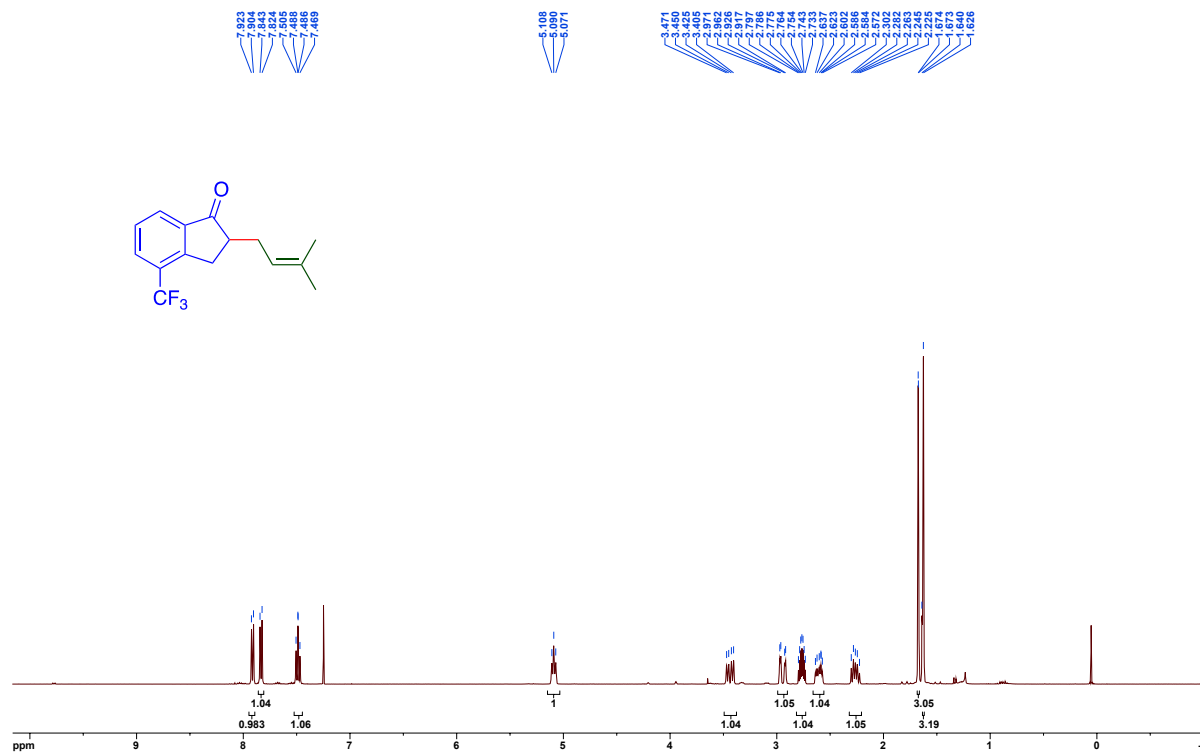

$^{13}\text{C}$  NMR spectrum of 2-(3-methylbut-2-en-1-yl)-4-(trifluoromethyl)-2,3-dihydro-1H-inden-1-one (**20**, 101 MHz,  $\text{CDCl}_3$ ):

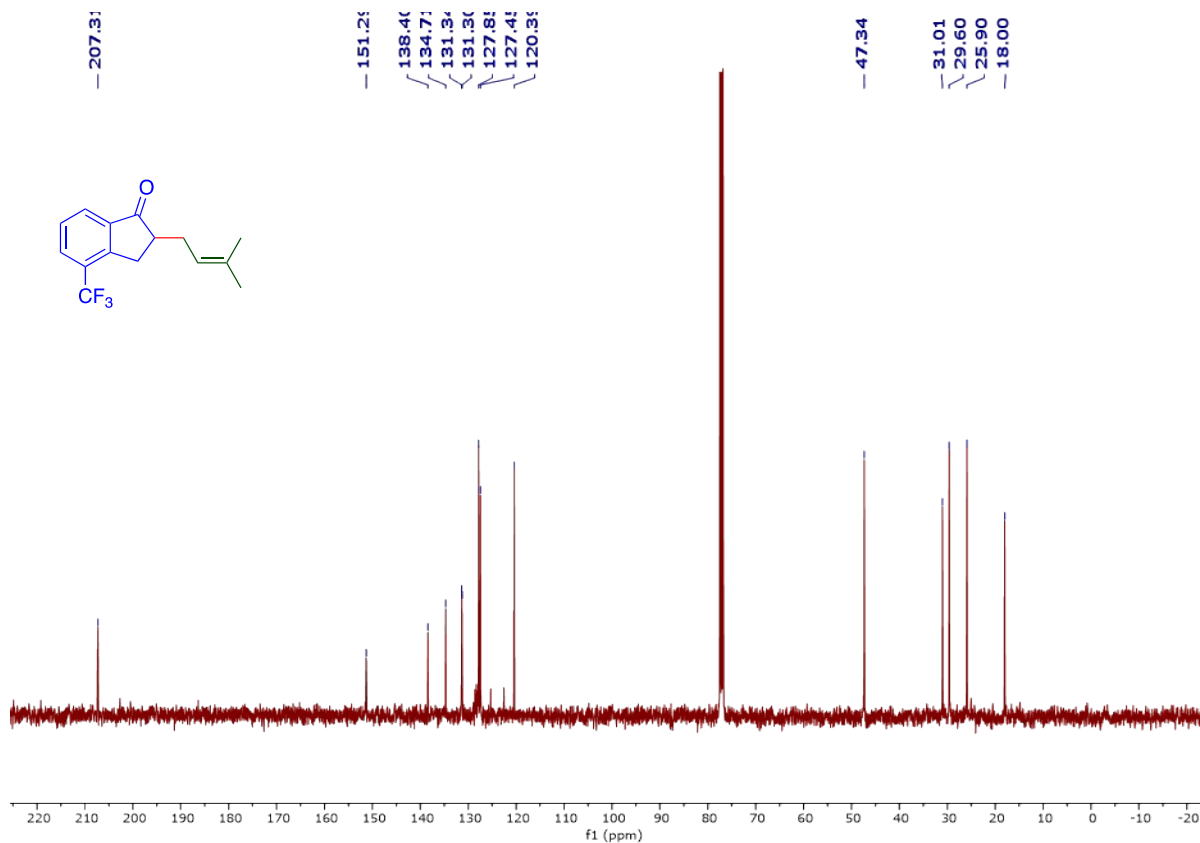

$^1\text{H}$  NMR spectrum of 5,7-Dichloro-2-(3-methylbut-2-en-1-yl)-2,3-dihydro-1*H*-inden-1-one (**2p**, 101 MHz,  $\text{CDCl}_3$ ):

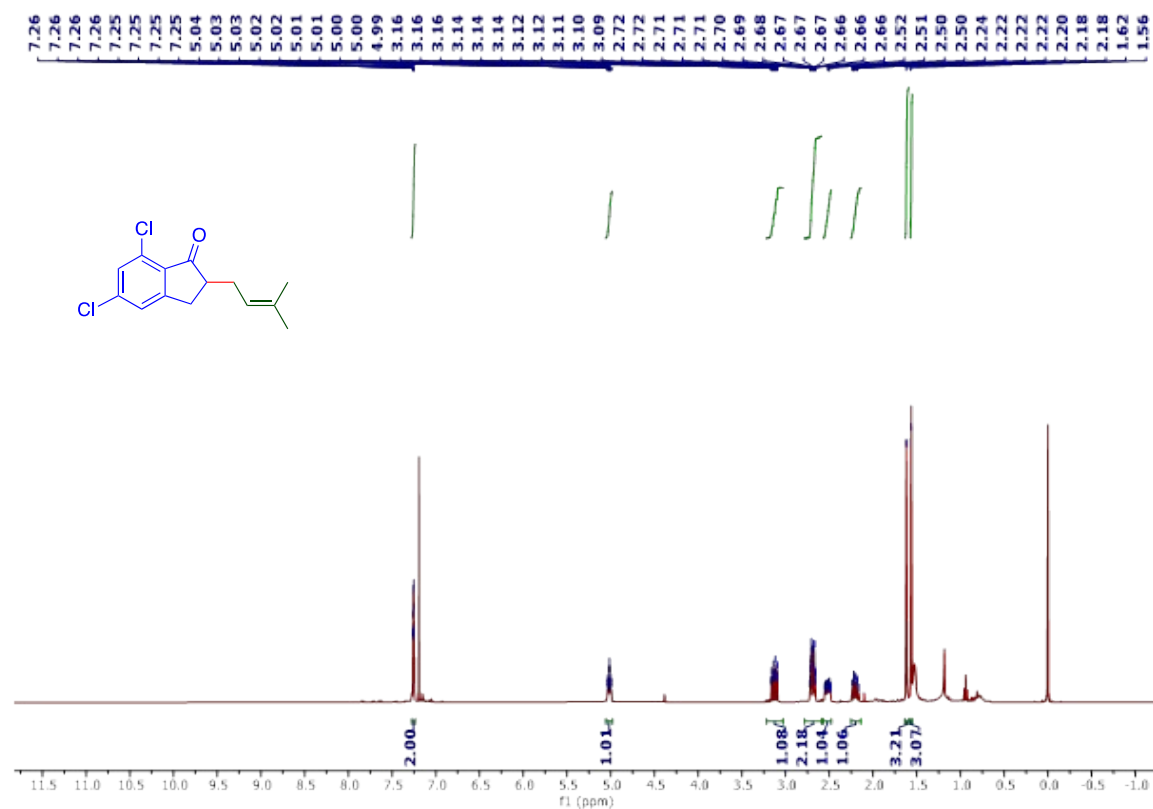

$^{13}\text{C}$  NMR spectrum of 5,7-Dichloro-2-(3-methylbut-2-en-1-yl)-2,3-dihydro-1*H*-inden-1-one (**2p**, 101 MHz,  $\text{CDCl}_3$ ):

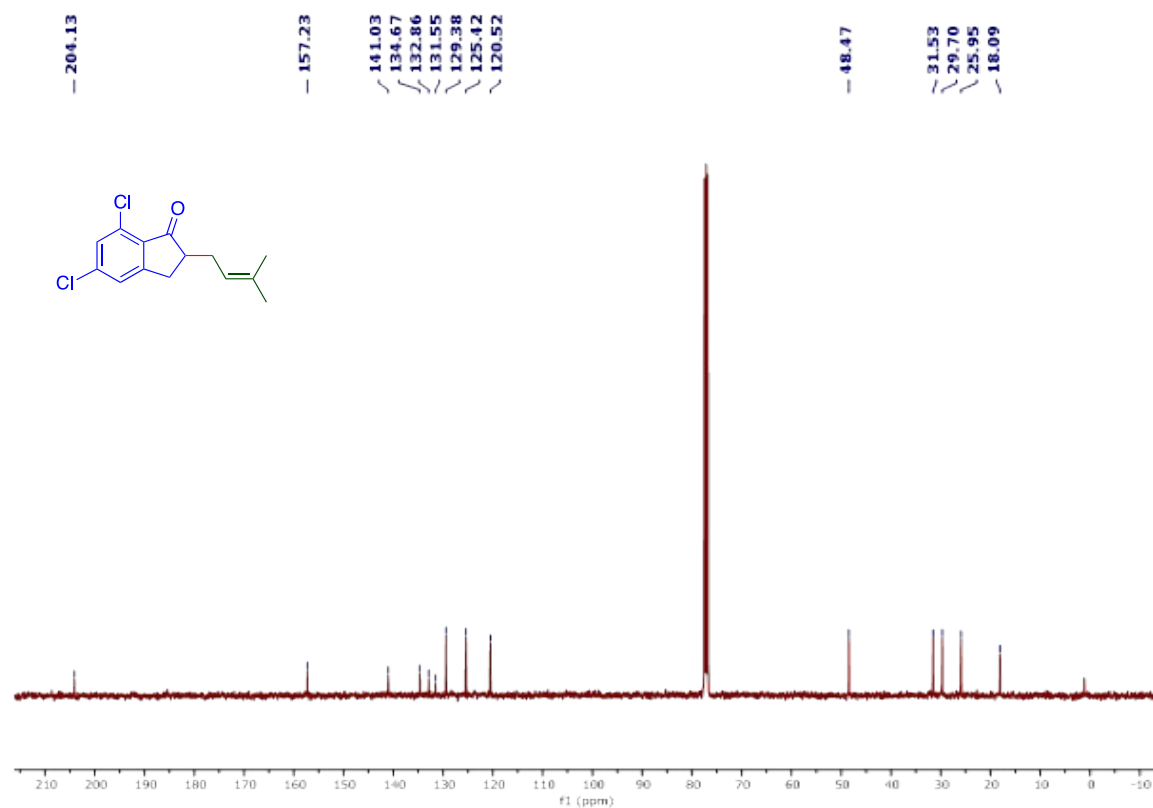

$^1\text{H}$  NMR spectrum of 5-bromo-2-(3-methylbut-2-en-1-yl)-2,3-dihydro-1H-inden-1-one (**2q**, 400 MHz,  $\text{CDCl}_3$ ) :

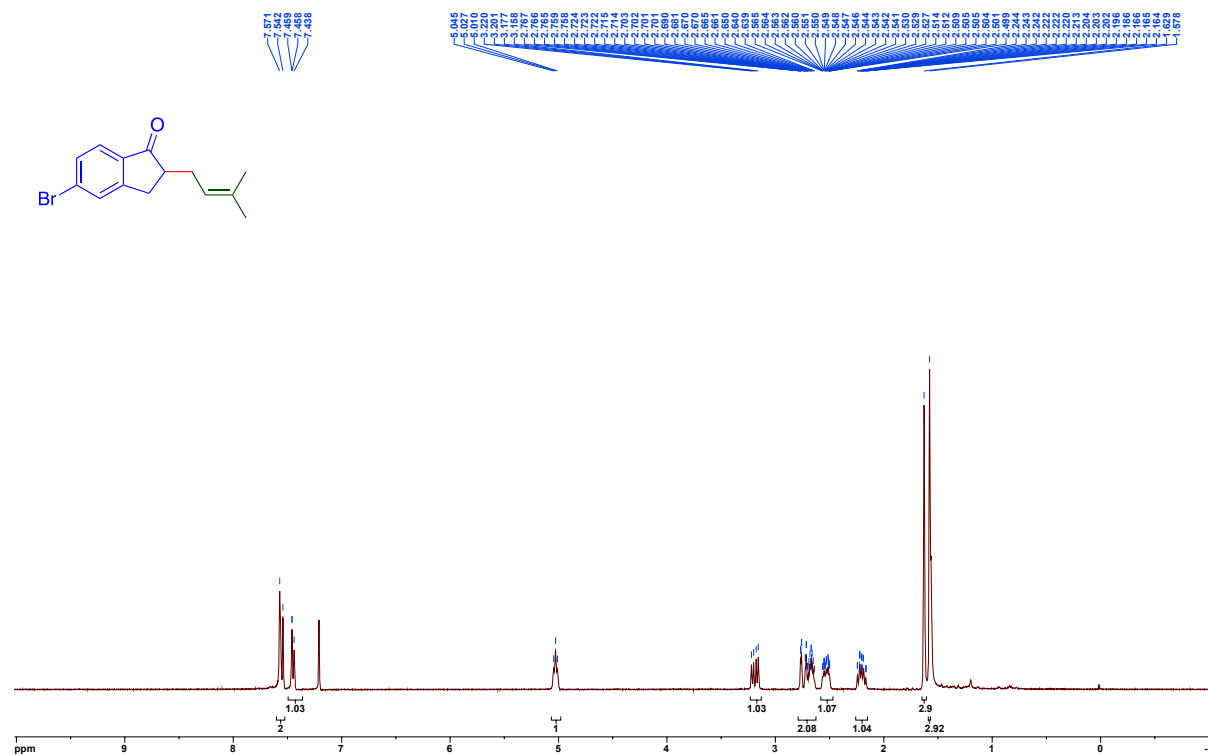

$^{13}\text{C}$  NMR spectrum of 5-bromo-2-(3-methylbut-2-en-1-yl)-2,3-dihydro-1H-inden-1-one (**2q**, 101 MHz,  $\text{CDCl}_3$ ):

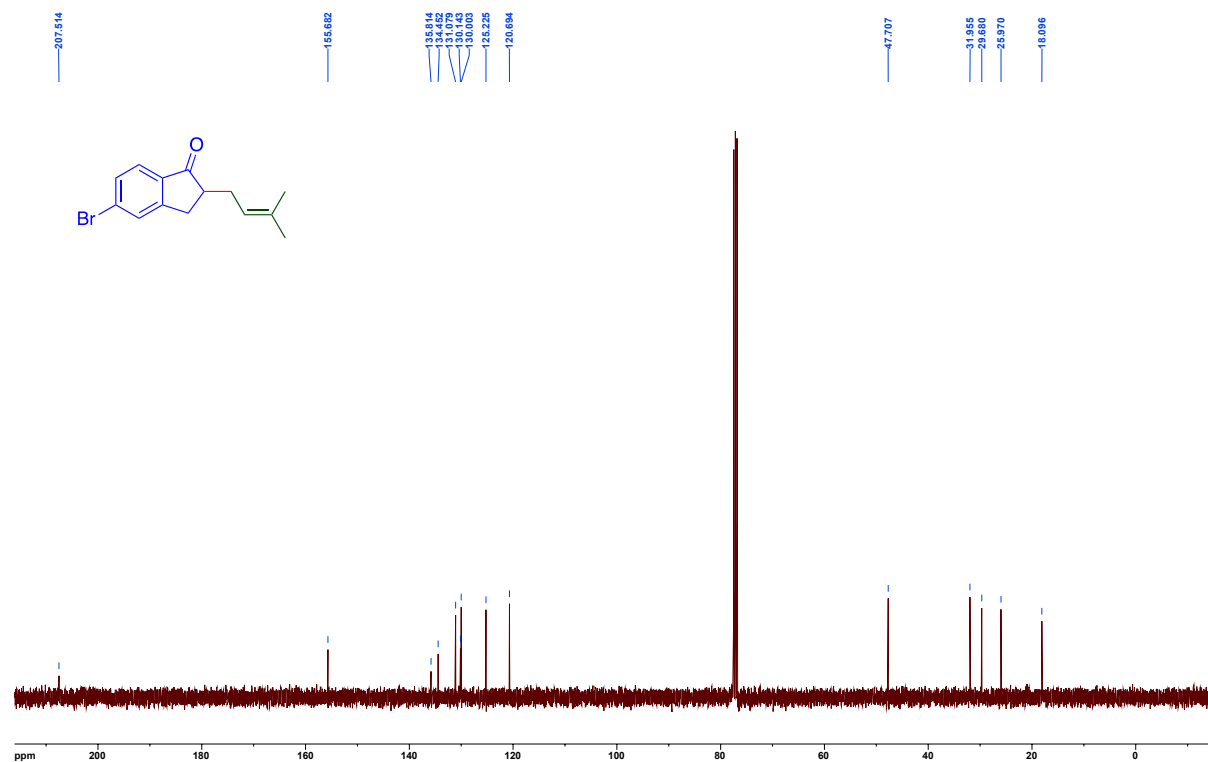

$^1\text{H}$  NMR spectrum of (*E*)-2-(3,7-dimethylocta-2,6-dien-1-yl)-3,4-dihydronaphthalen-1(2H)-one (**2r**, 400 MHz,  $\text{CDCl}_3$ ):

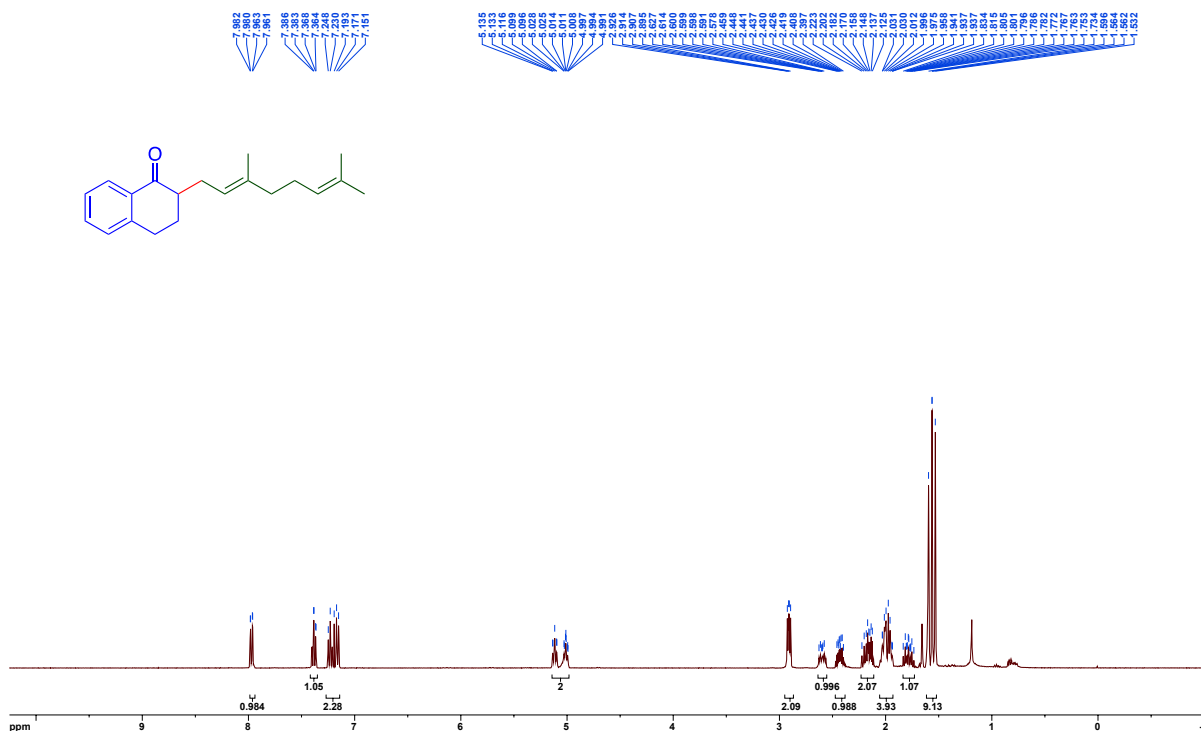

$^{13}\text{C}$  NMR spectrum of (*E*)-2-(3,7-dimethylocta-2,6-dien-1-yl)-3,4-dihydronaphthalen-1(2H)-one (**2r**, 101 MHz,  $\text{CDCl}_3$ ):

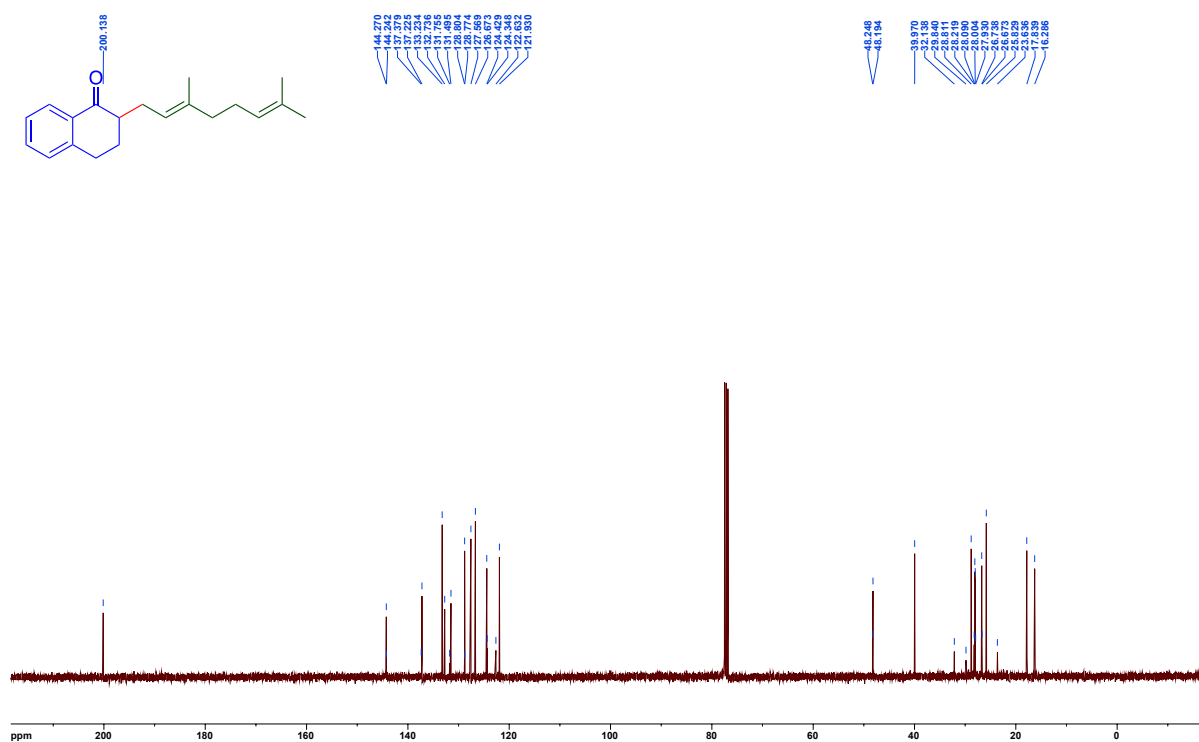

$^1\text{H}$  NMR spectrum of 2-((2*E*,6*E*)-3,7,11-trimethyldodeca-2,6,10-trien-1-yl)-3,4-dihydronaphthalen-1(2*H*)-one (**2s**, 400 MHz,  $\text{CDCl}_3$ ):

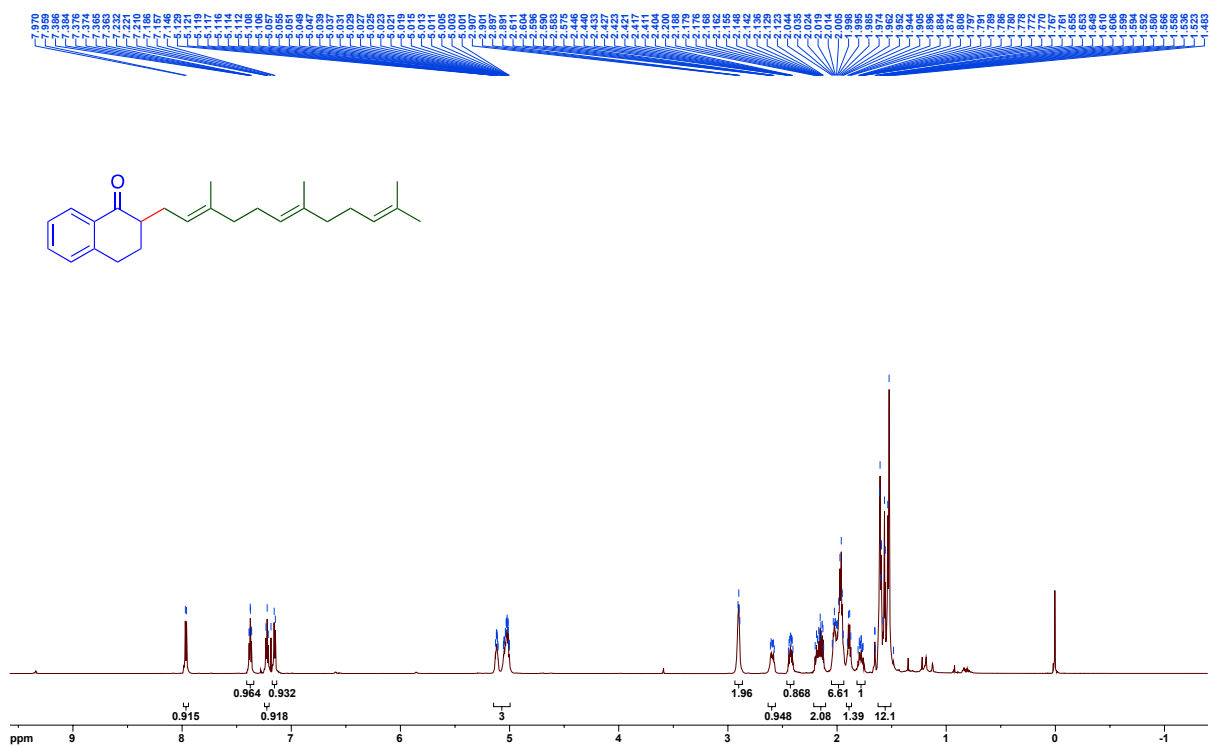

$^{13}\text{C}$  NMR spectrum of 2-((2*E*,6*E*)-3,7,11-trimethyldodeca-2,6,10-trien-1-yl)-3,4-dihydronaphthalen-1(2*H*)-one (**2s**, 101 MHz,  $\text{CDCl}_3$ ):

$^1\text{H}$  NMR spectrum of (*E*)-2-(3,7,11,15-tetramethylhexadec-2-en-1-yl)-3,4-dihydronaphthalen-1(2H)-one (**2t**, 400 MHz,  $\text{CDCl}_3$ ):

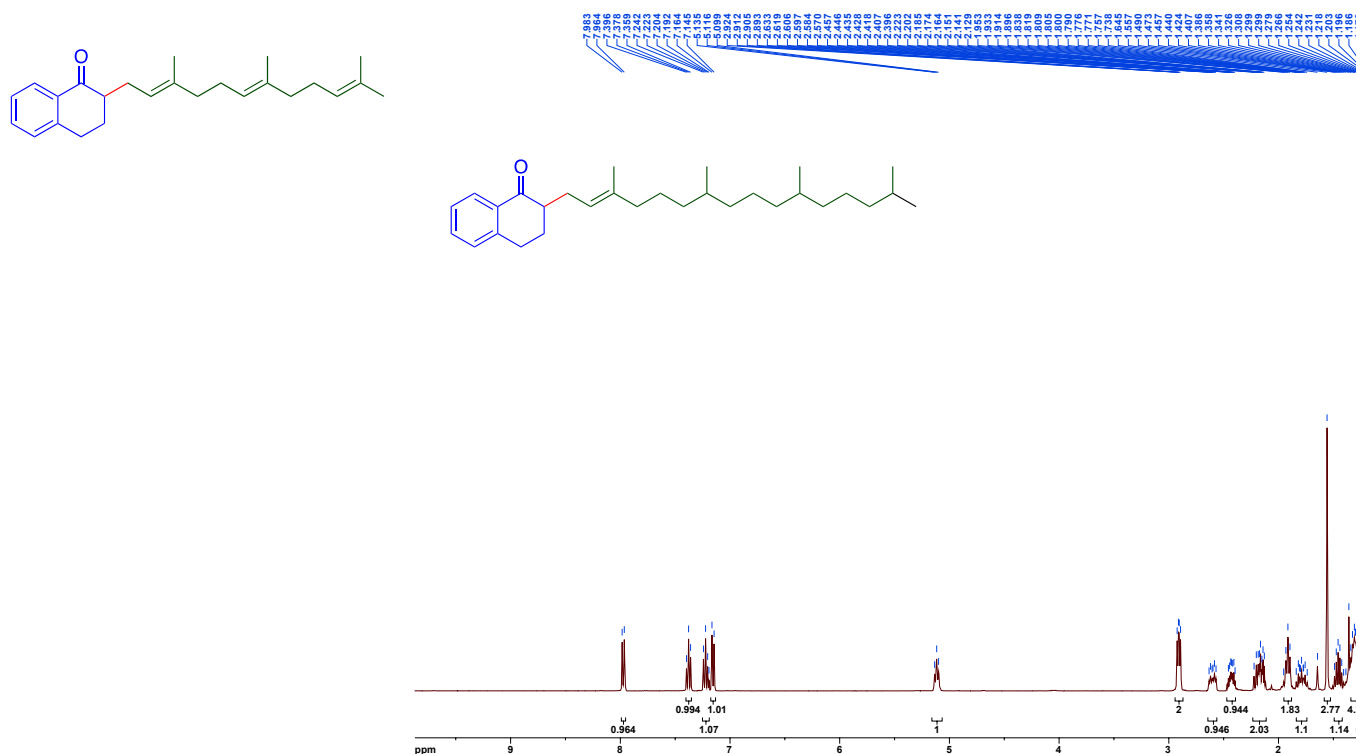

$^{13}\text{C}$  NMR spectrum of (*E*)-2-(3,7,11,15-tetramethylhexadec-2-en-1-yl)-3,4-dihydronaphthalen-1(2H)-one (**2t**, 101 MHz,  $\text{CDCl}_3$ ):

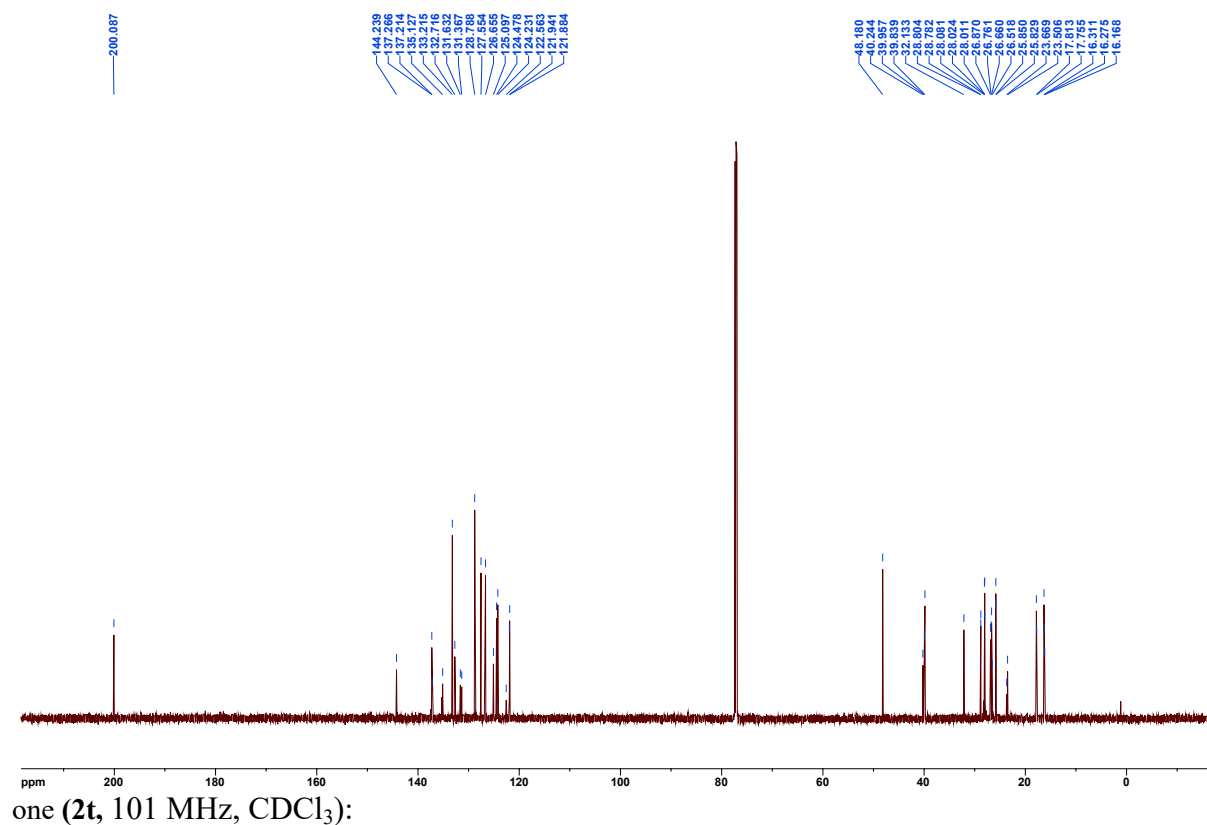

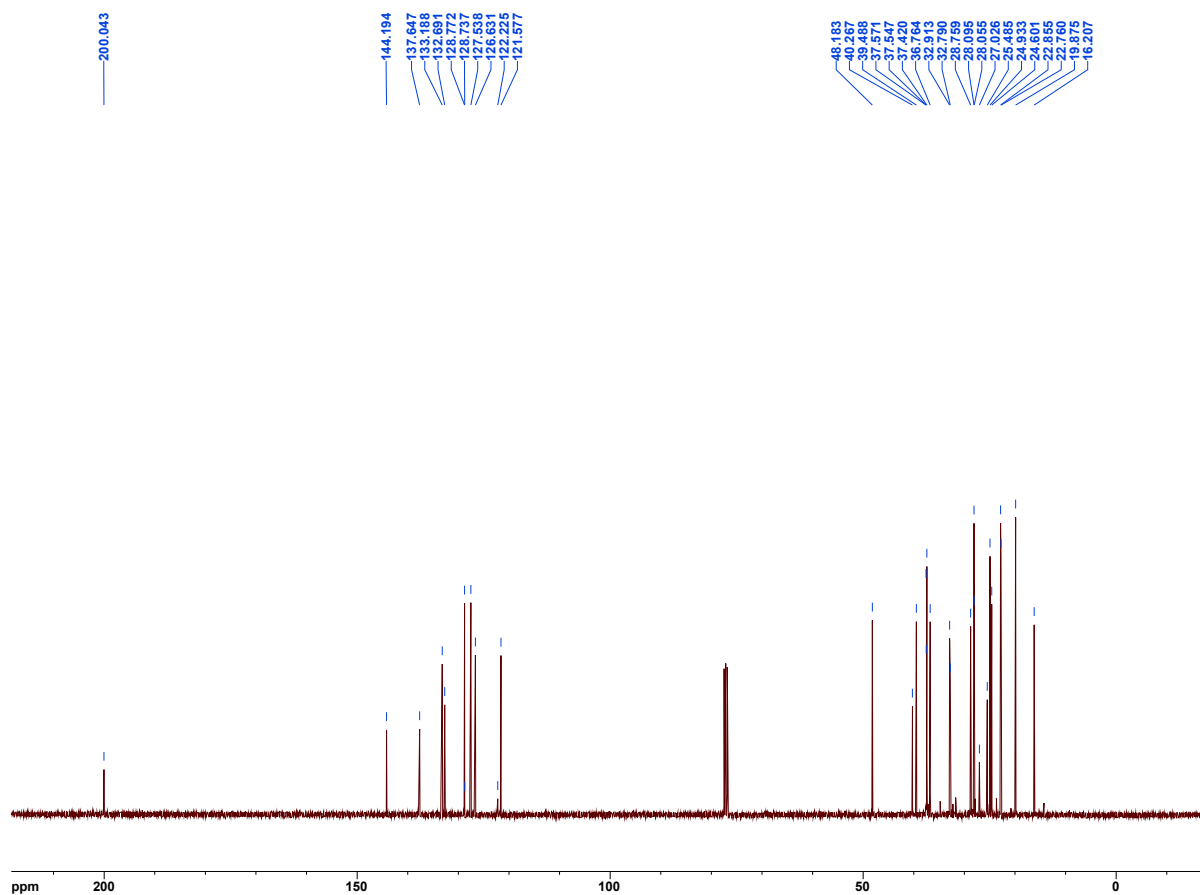

$^1\text{H}$  NMR spectrum of 5-methyl-1-phenylhex-4-en-1-one (**3a**, 400 MHz,  $\text{CDCl}_3$ ) :

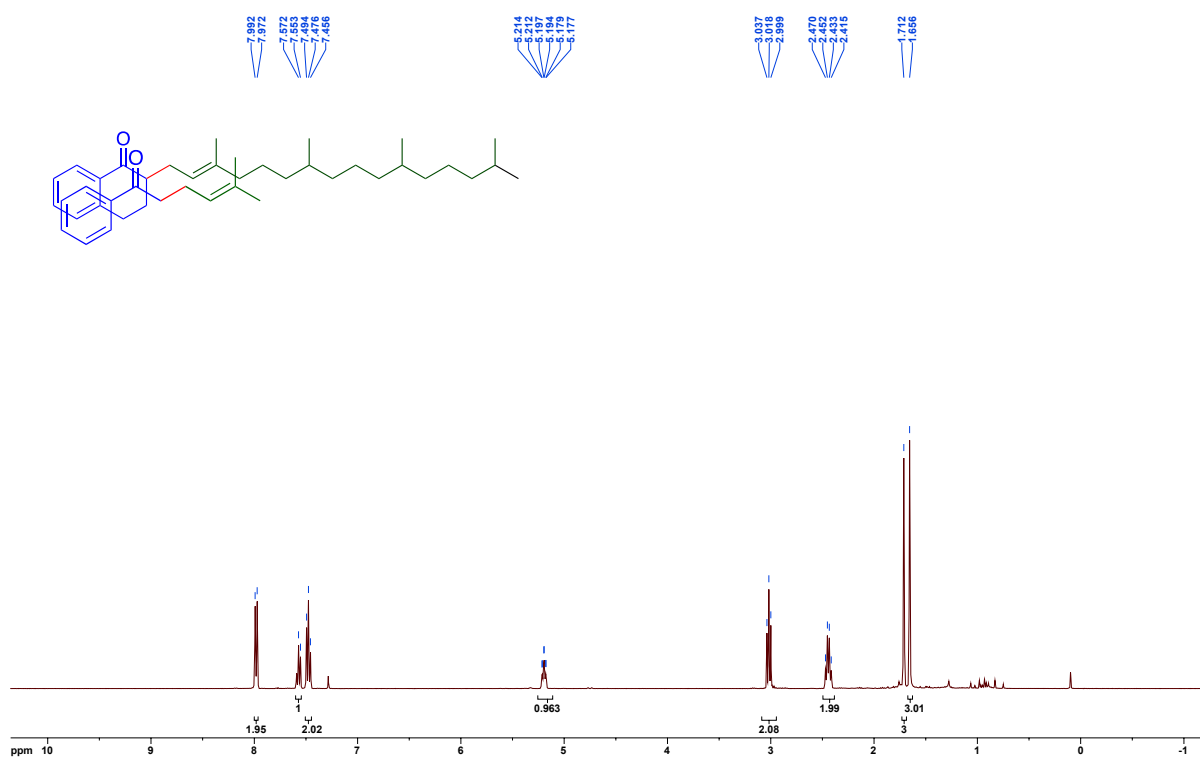



$^{13}\text{C}$  NMR spectrum of 5-methyl-1-(p-tolyl)hex-4-en-1-one (**3a**, 101 MHz,  $\text{CDCl}_3$ ):

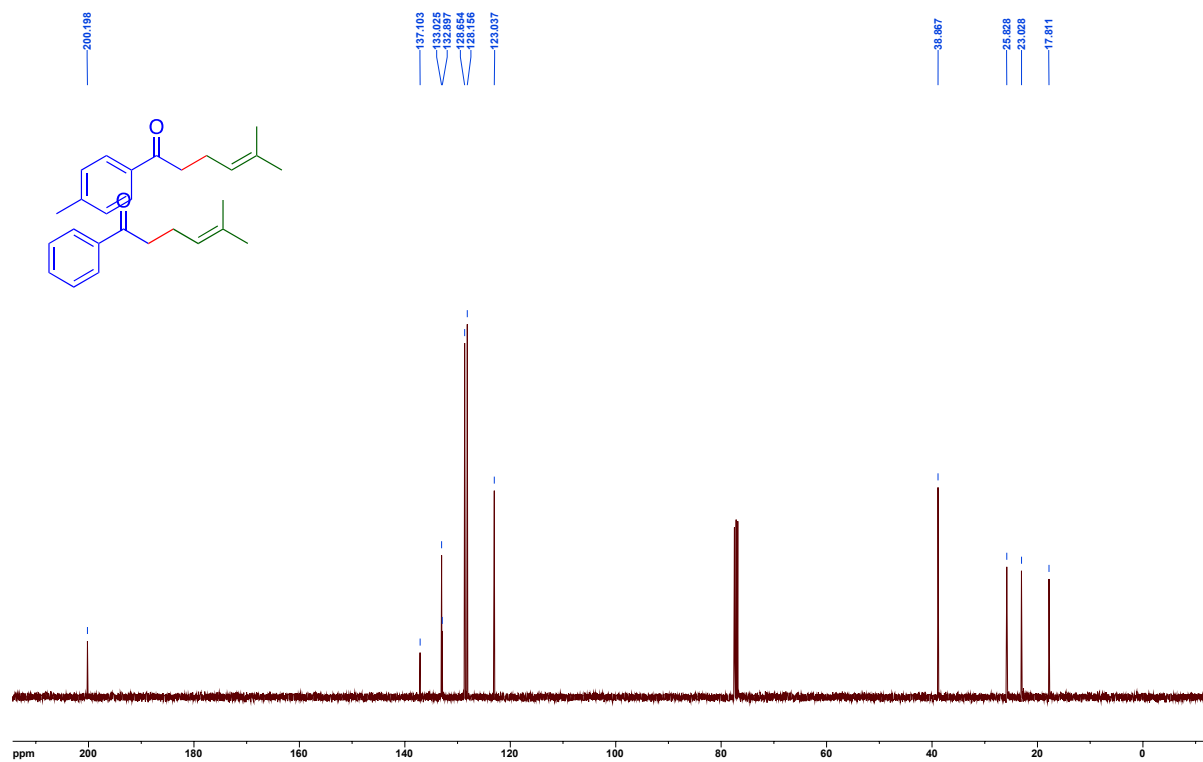

$^1\text{H}$  NMR spectrum of 5-methyl-1-(p-tolyl)hex-4-en-1-one (**3b**, 400 MHz,  $\text{CDCl}_3$ ):

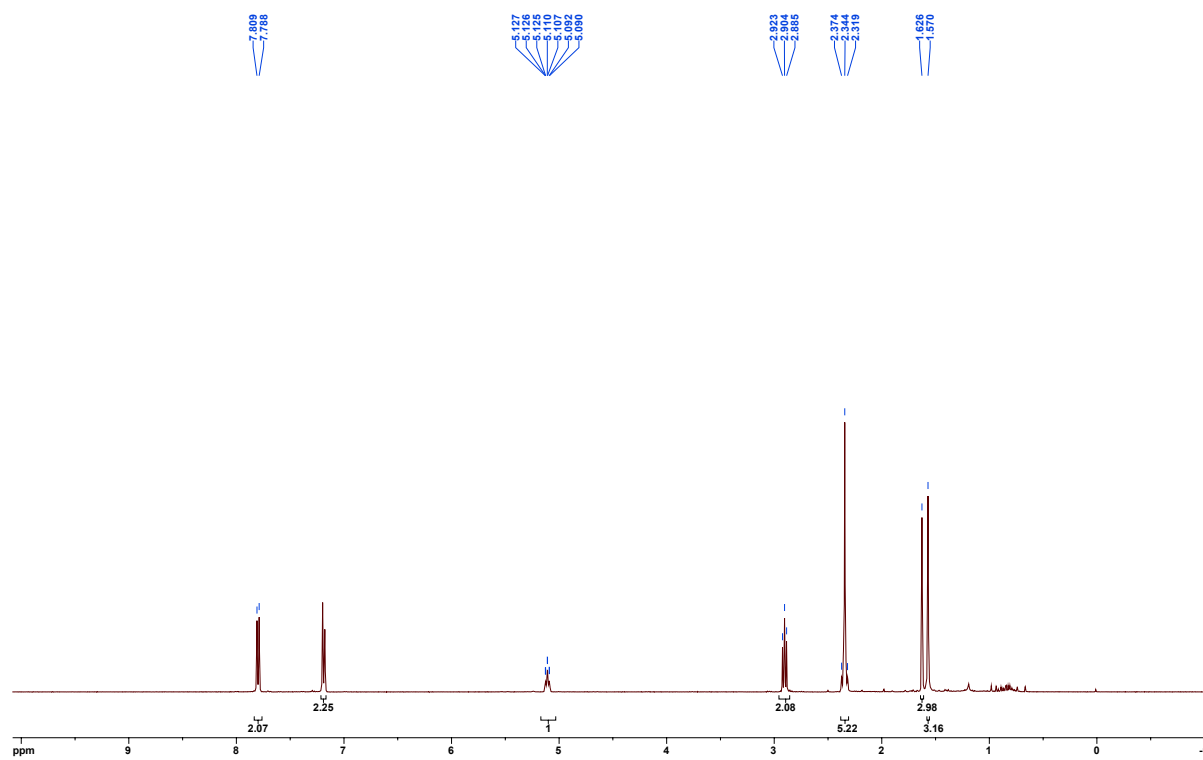

$^{13}\text{C}$  NMR spectrum of 5-methyl-1-(p-tolyl)hex-4-en-1-one (**3b**, 101 MHz,  $\text{CDCl}_3$ ):

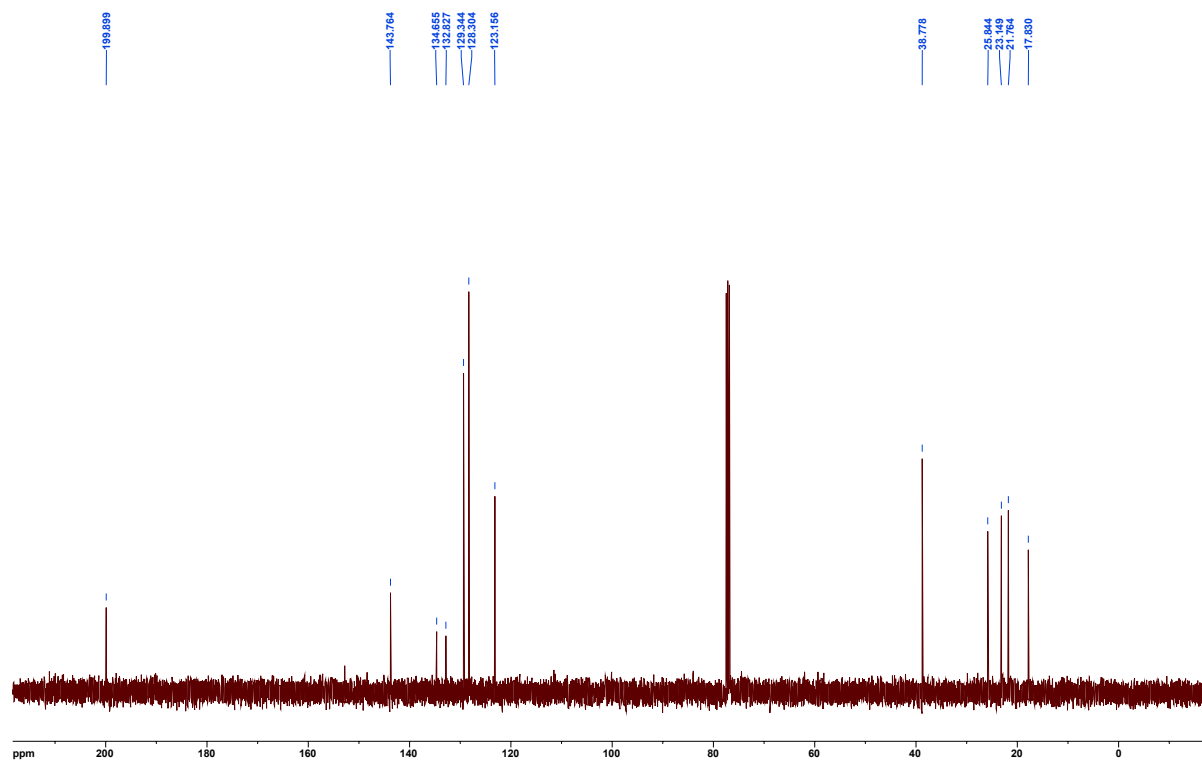

$^1\text{H}$  NMR spectrum of 1-mesityl-5-methylhex-4-en-1-one (**3c**, 400 MHz,  $\text{CDCl}_3$ ):

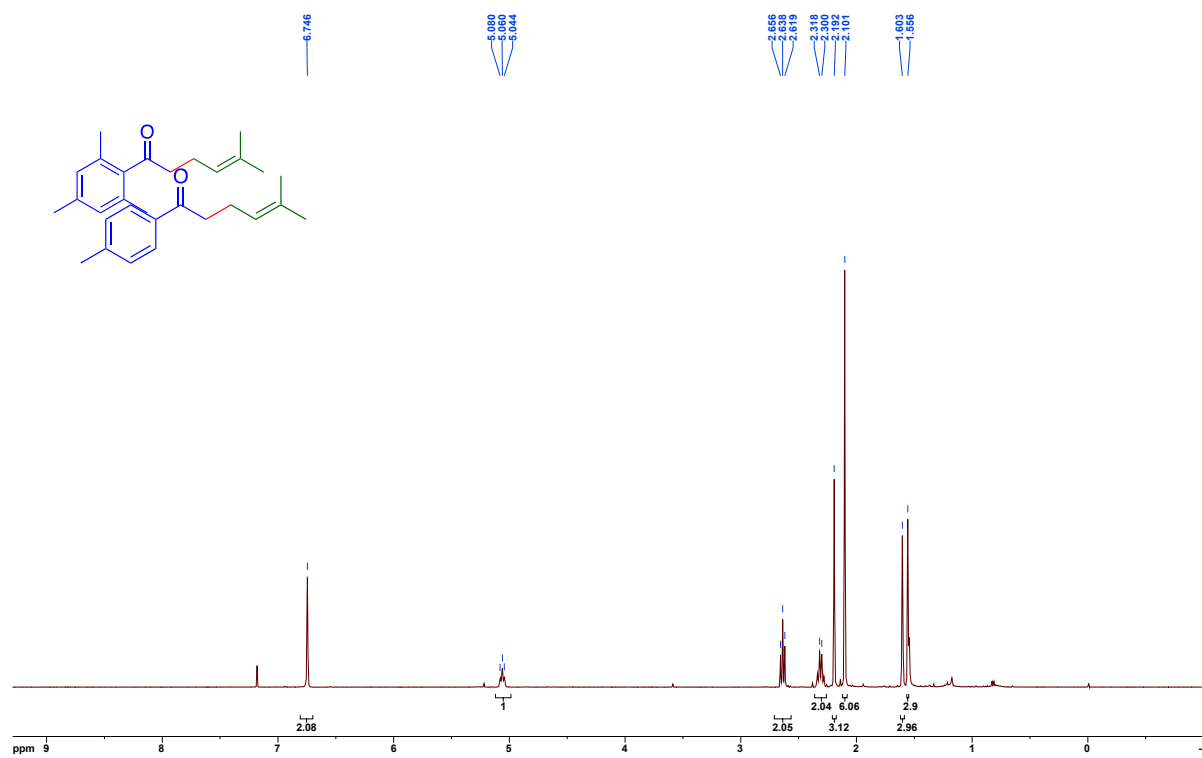

$^{13}\text{C}$  NMR spectrum of 1-mesityl-5-methylhex-4-en-1-one (**3c**, 101 MHz,  $\text{CDCl}_3$ ):

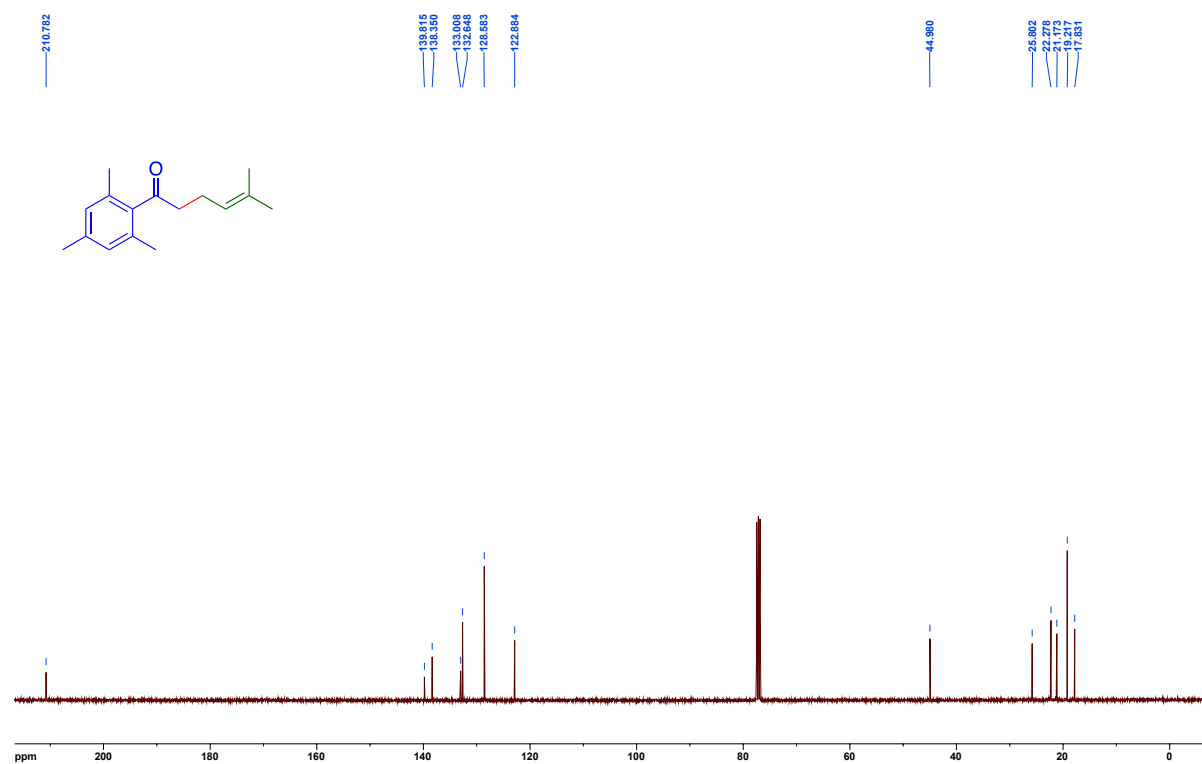

$^1\text{H}$  NMR spectrum of 1-(4-methoxyphenyl)-5-methylhex-4-en-1-one (**3d**, 400 MHz,  $\text{CDCl}_3$ ) :

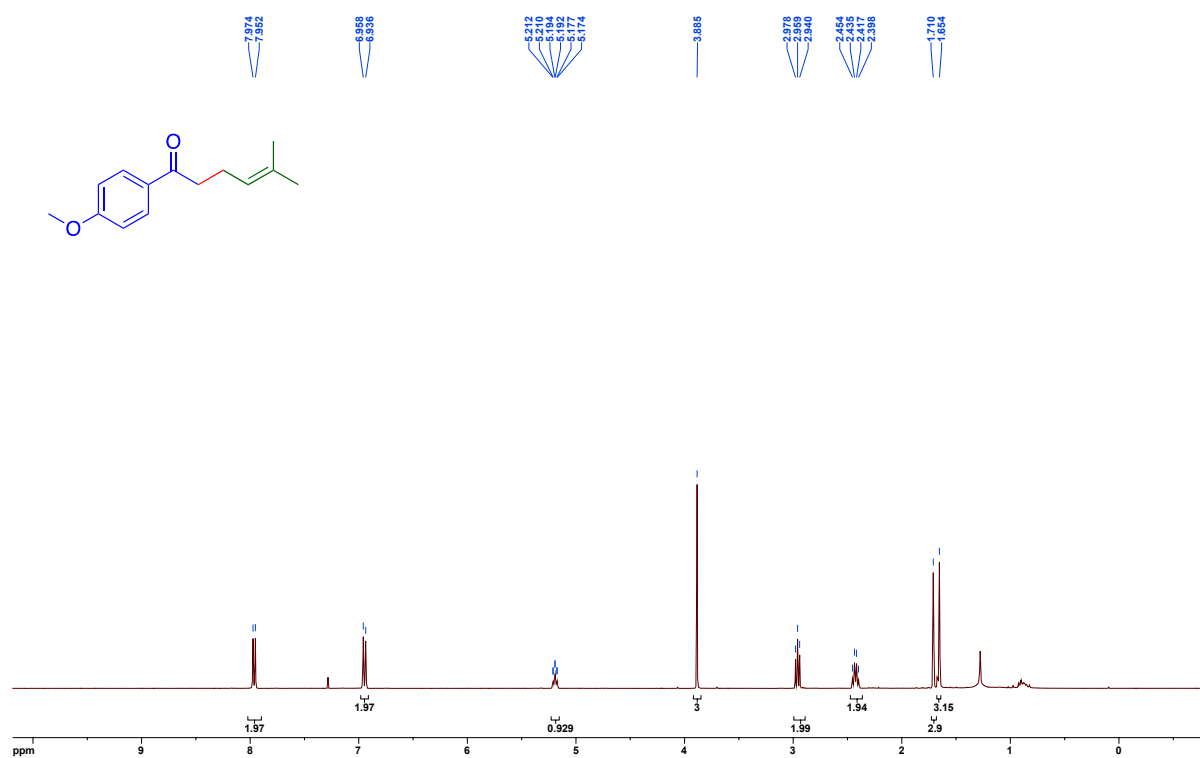

$^{13}\text{C}$  NMR spectrum of 1-(4-methoxyphenyl)-5-methylhex-4-en-1-one (**3d**, 101 MHz,  $\text{CDCl}_3$ ):

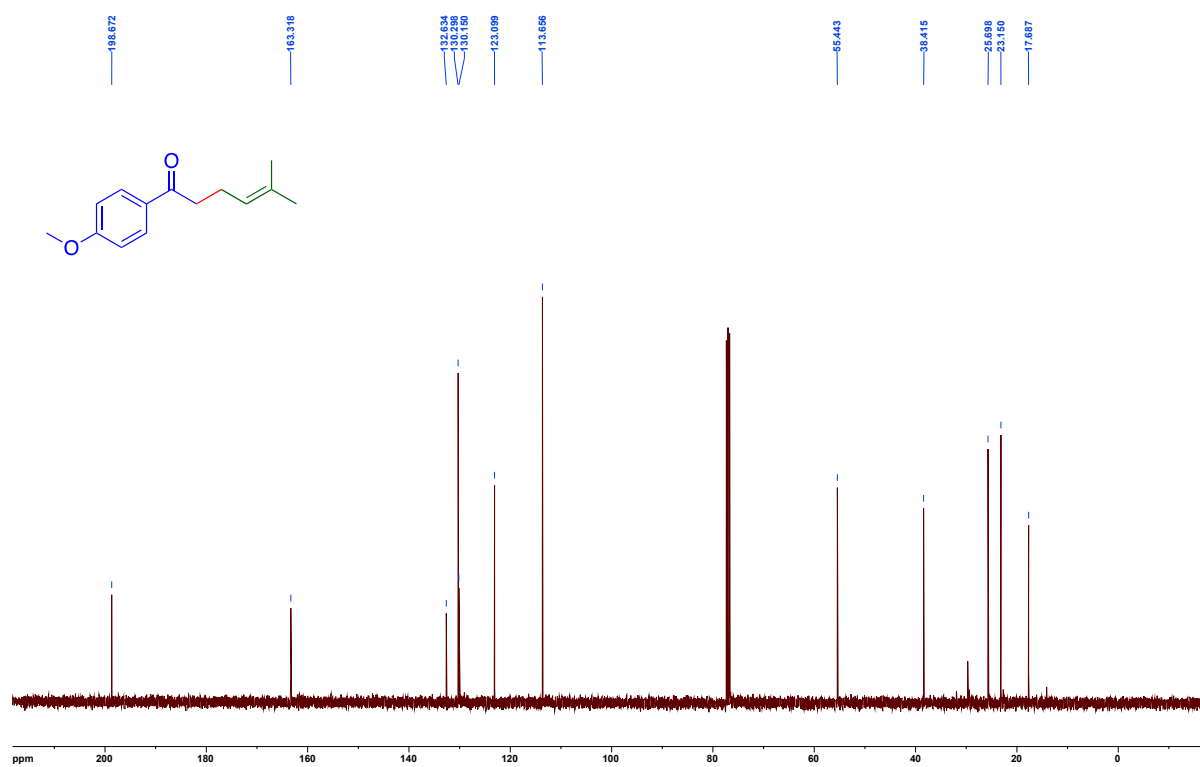

$^1\text{H}$  NMR spectrum of 1-(2,3-dihydrobenzo[b][1,4]dioxin-6-yl)-5-methylhex-4-en-1-one (**3e**, 400 MHz,  $\text{CDCl}_3$ ) :

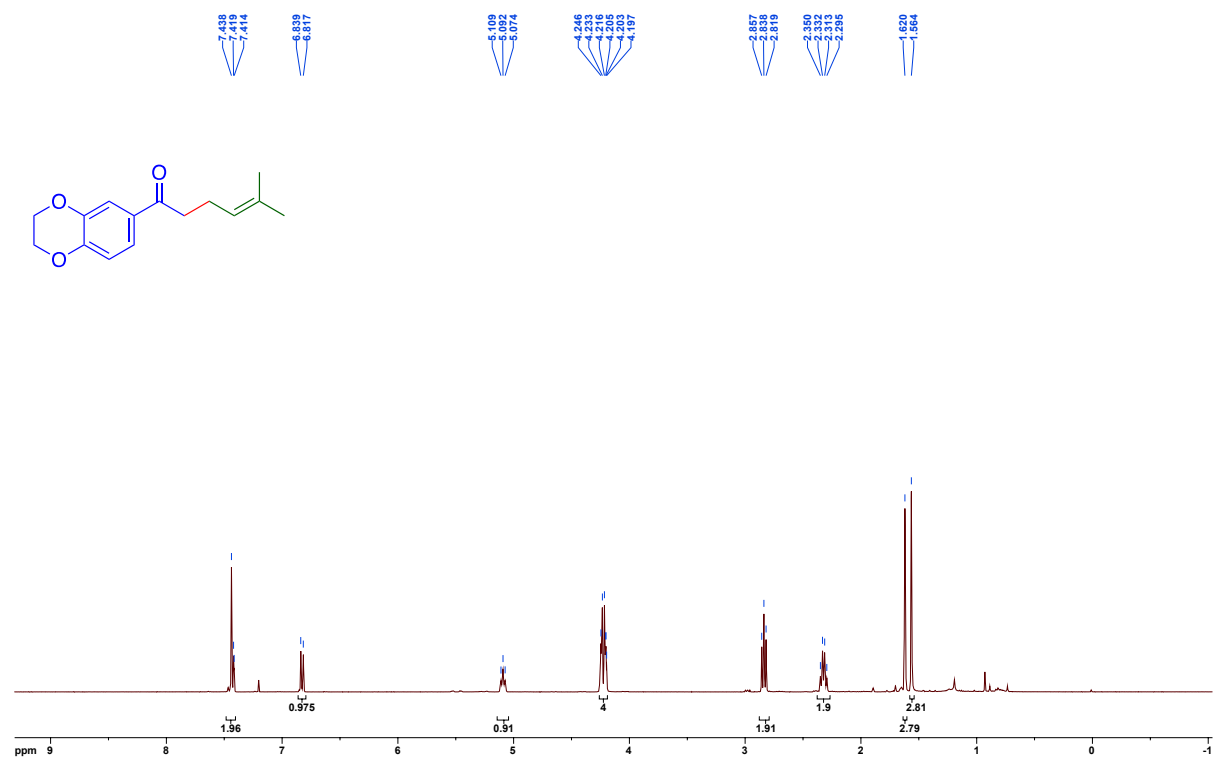

$^{13}\text{C}$  NMR spectrum of 1-(2,3-dihydrobenzo[b][1,4]dioxin-6-yl)-5-methylhex-4-en-1-one (**3e**, 101 MHz,  $\text{CDCl}_3$ ):

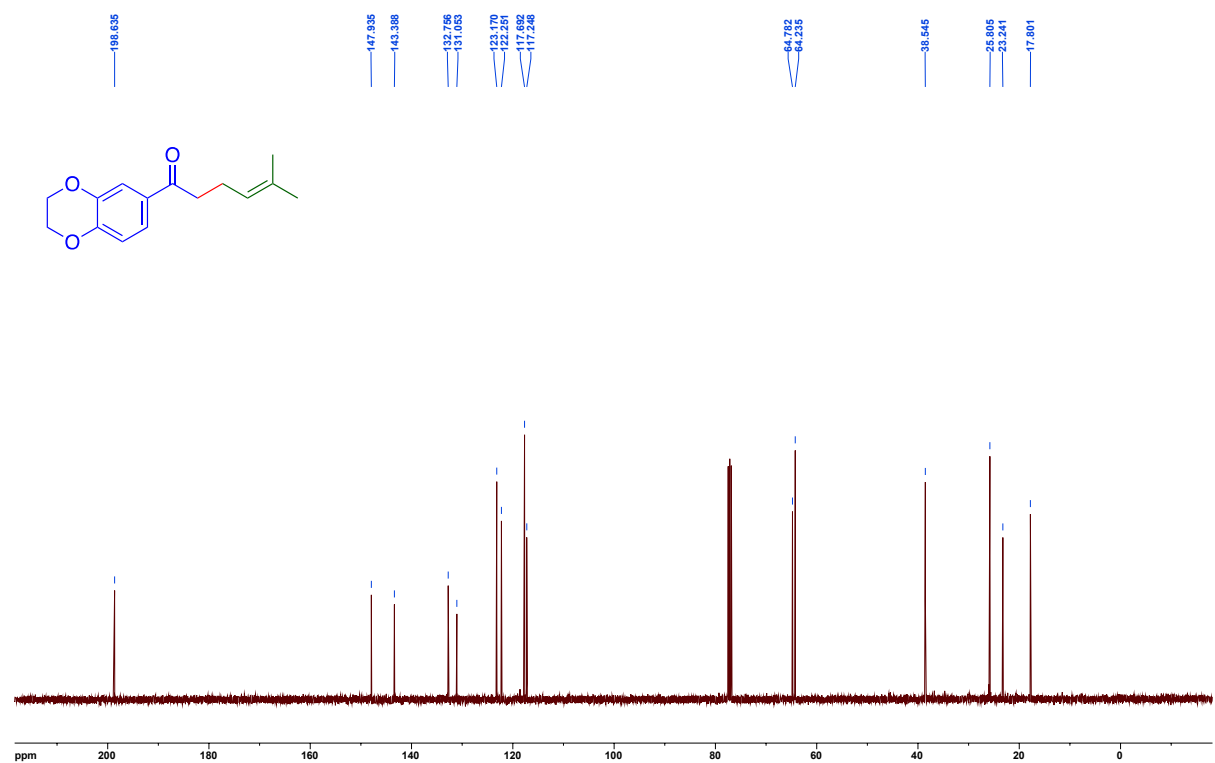

$^1\text{H}$  NMR spectrum of 5-methyl-1-(3,4,5-trimethoxyphenyl)hex-4-en-1-one (**3f**, 400 MHz,  $\text{CDCl}_3$ ):

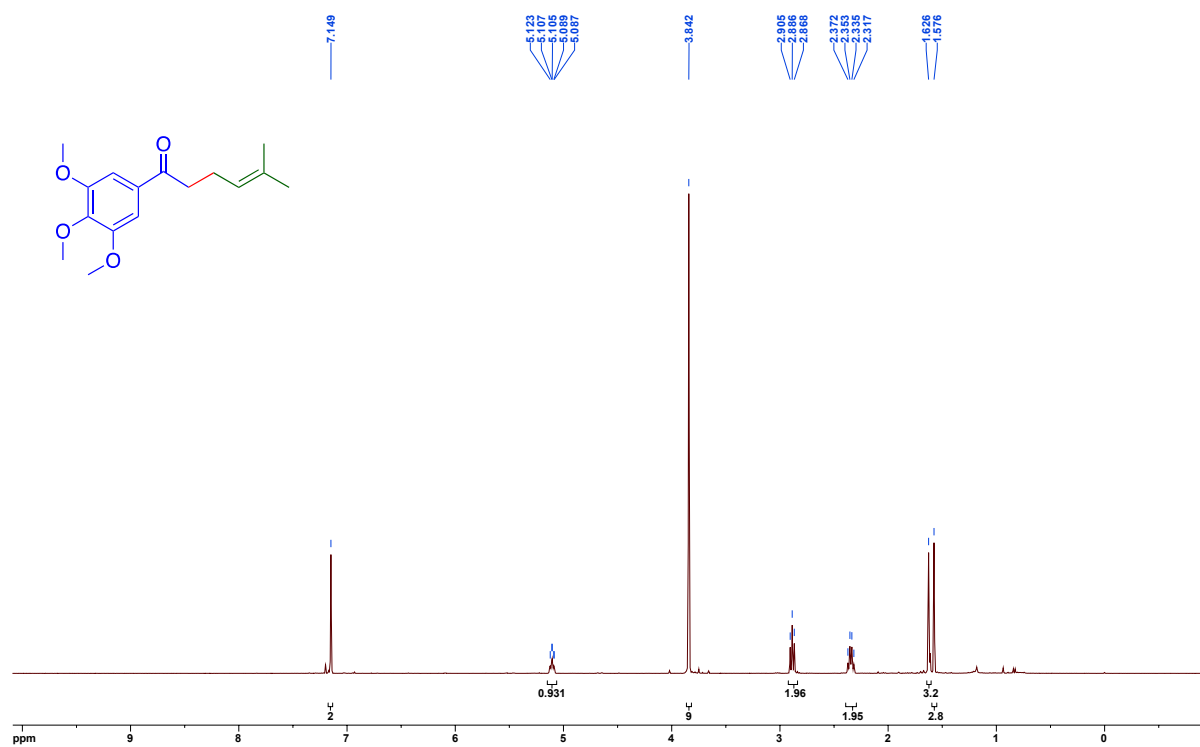

$^{13}\text{C}$  NMR spectrum of 5-methyl-1-(3,4,5-trimethoxyphenyl)hex-4-en-1-one (**3f**, 101 MHz,  $\text{CDCl}_3$ ):

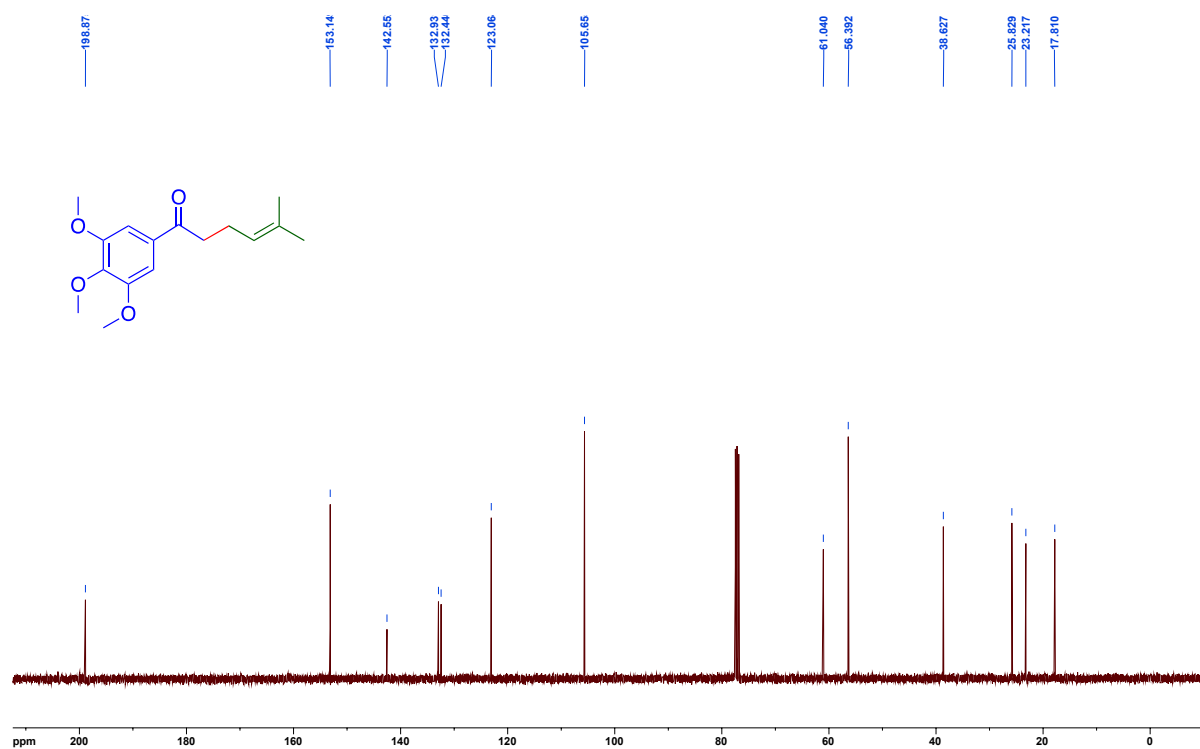

$^1\text{H}$  NMR spectrum of 1-(4-fluorophenyl)-5-methylhex-4-en-1-one (**3g**, 400 MHz,  $\text{CDCl}_3$ ) :

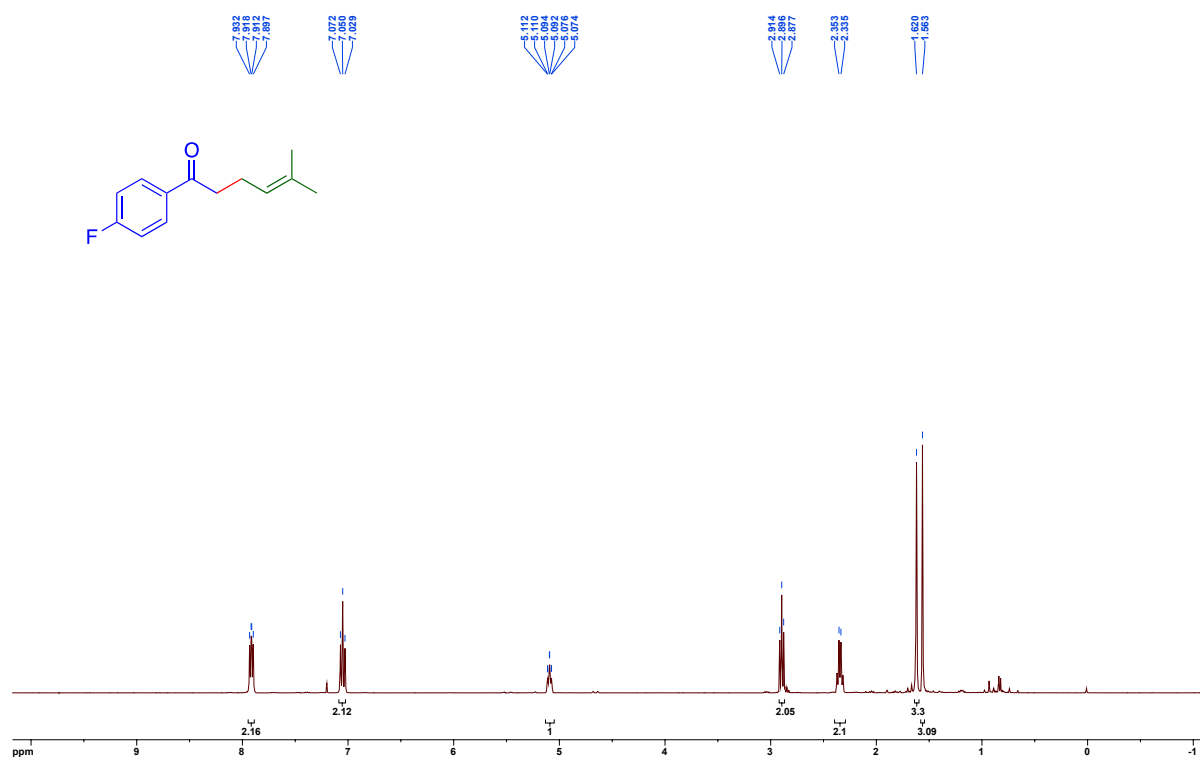

$^{13}\text{C}$  NMR spectrum of 1-(4-fluorophenyl)-5-methylhex-4-en-1-one (**3g**, 101 MHz,  $\text{CDCl}_3$ ):

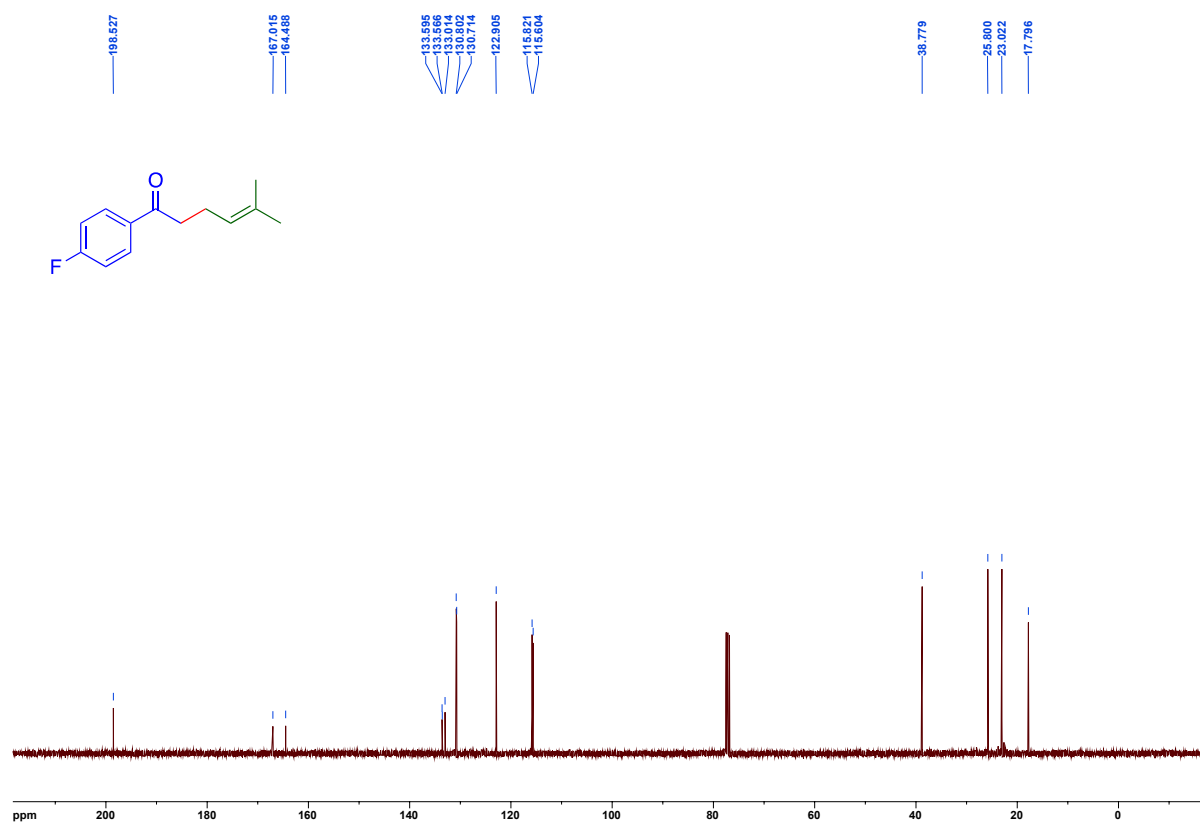

$^1\text{H}$  NMR spectrum of 1-(4-chlorophenyl)-5-methylhex-4-en-1-one (**3h**, 400 MHz,  $\text{CDCl}_3$ ) :

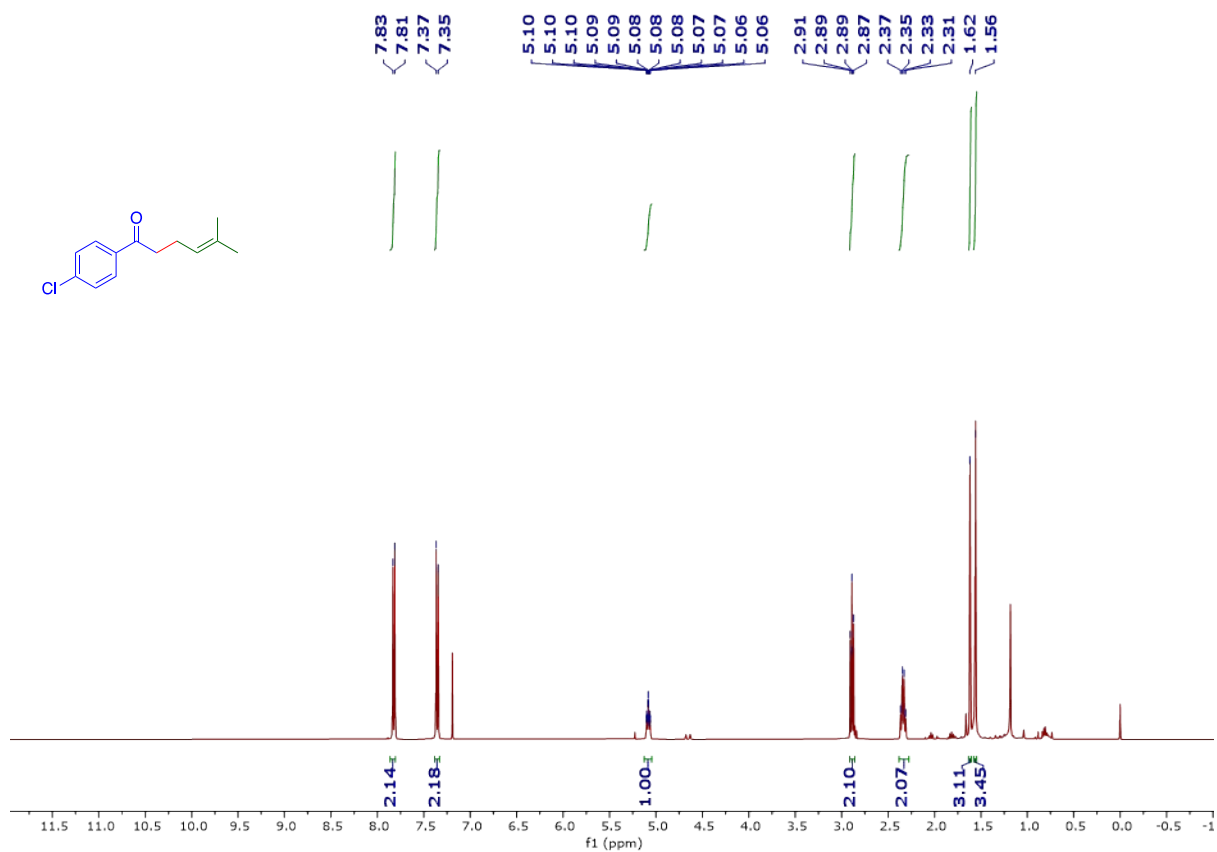

$^{13}\text{C}$  NMR spectrum of 1-(4-chlorophenyl)-5-methylhex-4-en-1-one (**3h**, 101 MHz,  $\text{CDCl}_3$ )

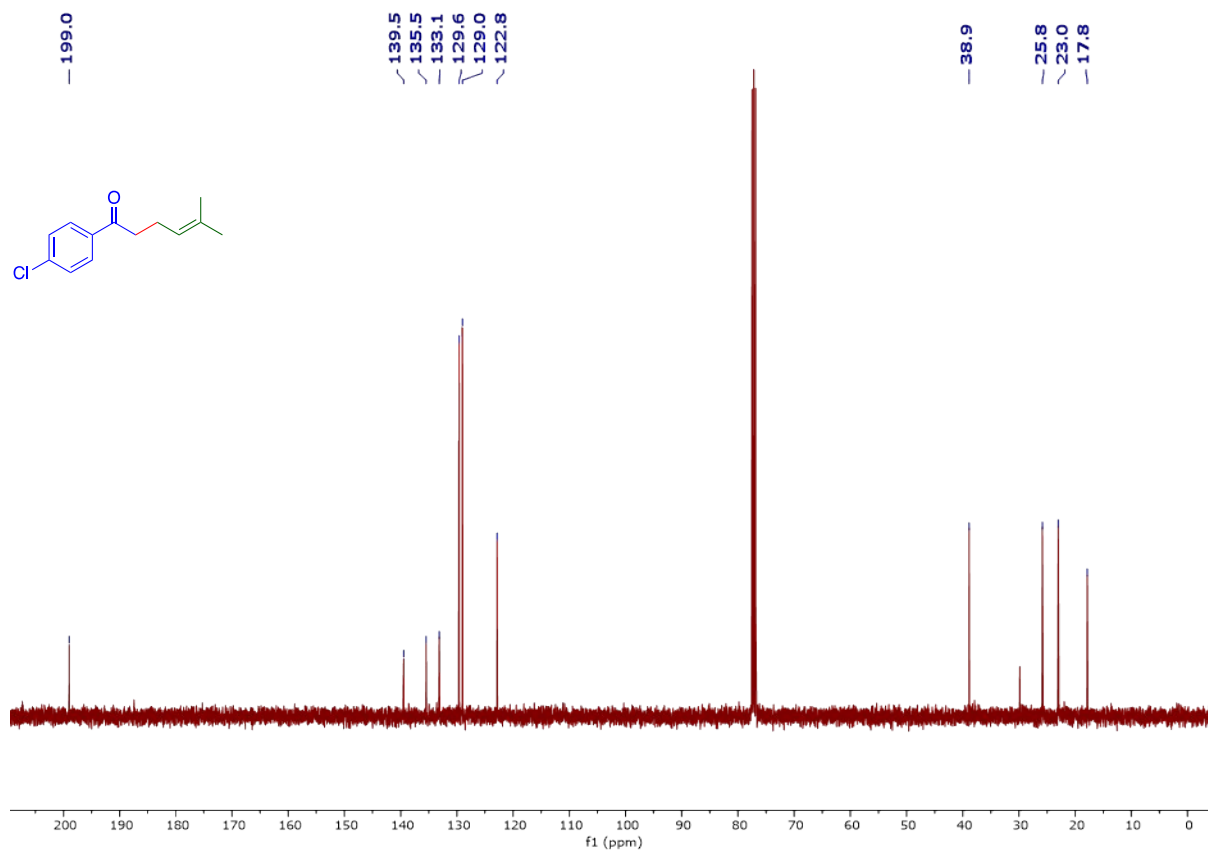



$^1\text{H}$  NMR spectrum of 1-(4-bromophenyl)-5-methylhex-4-en-1-one (**3i**, 400 MHz,  $\text{CDCl}_3$ ) :

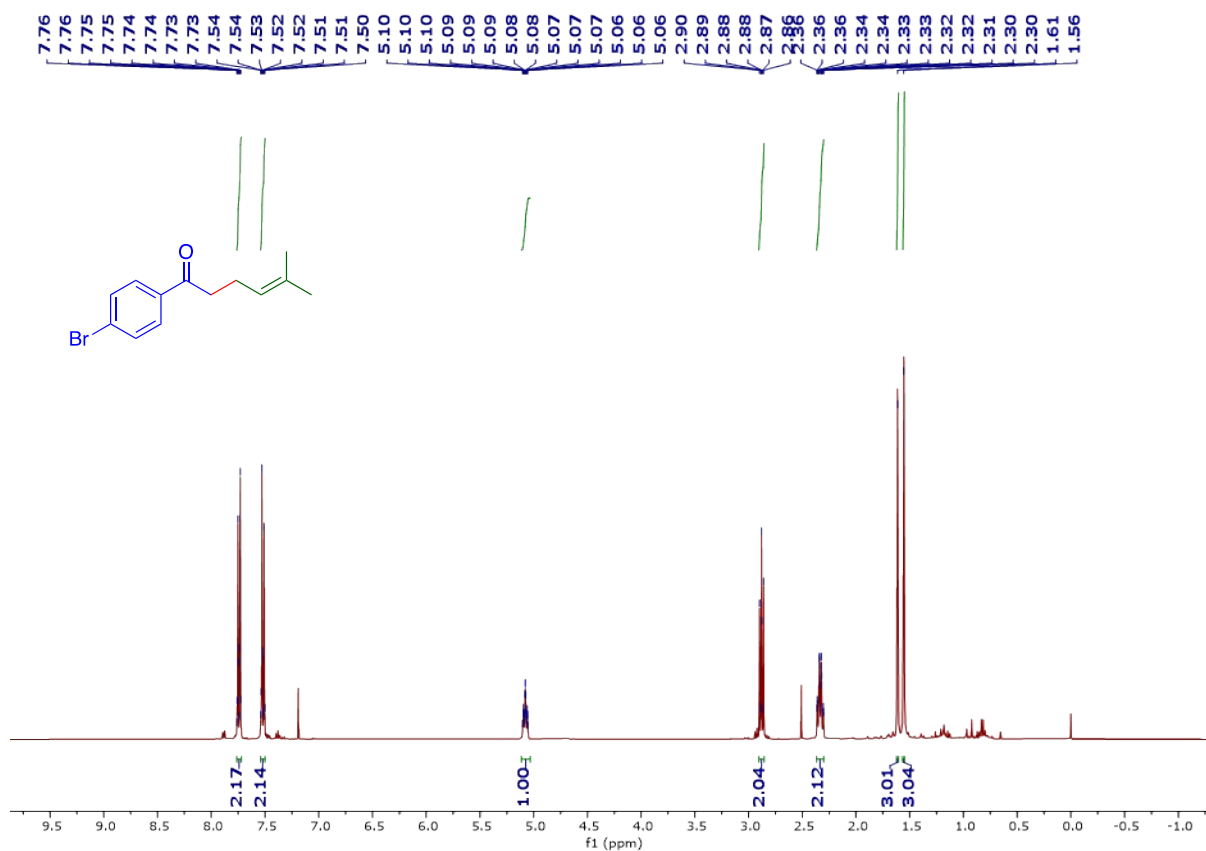

$^{13}\text{C}$  NMR spectrum of 1-(4-bromophenyl)-5-methylhex-4-en-1-one (**3i**, 101 MHz,  $\text{CDCl}_3$ ):

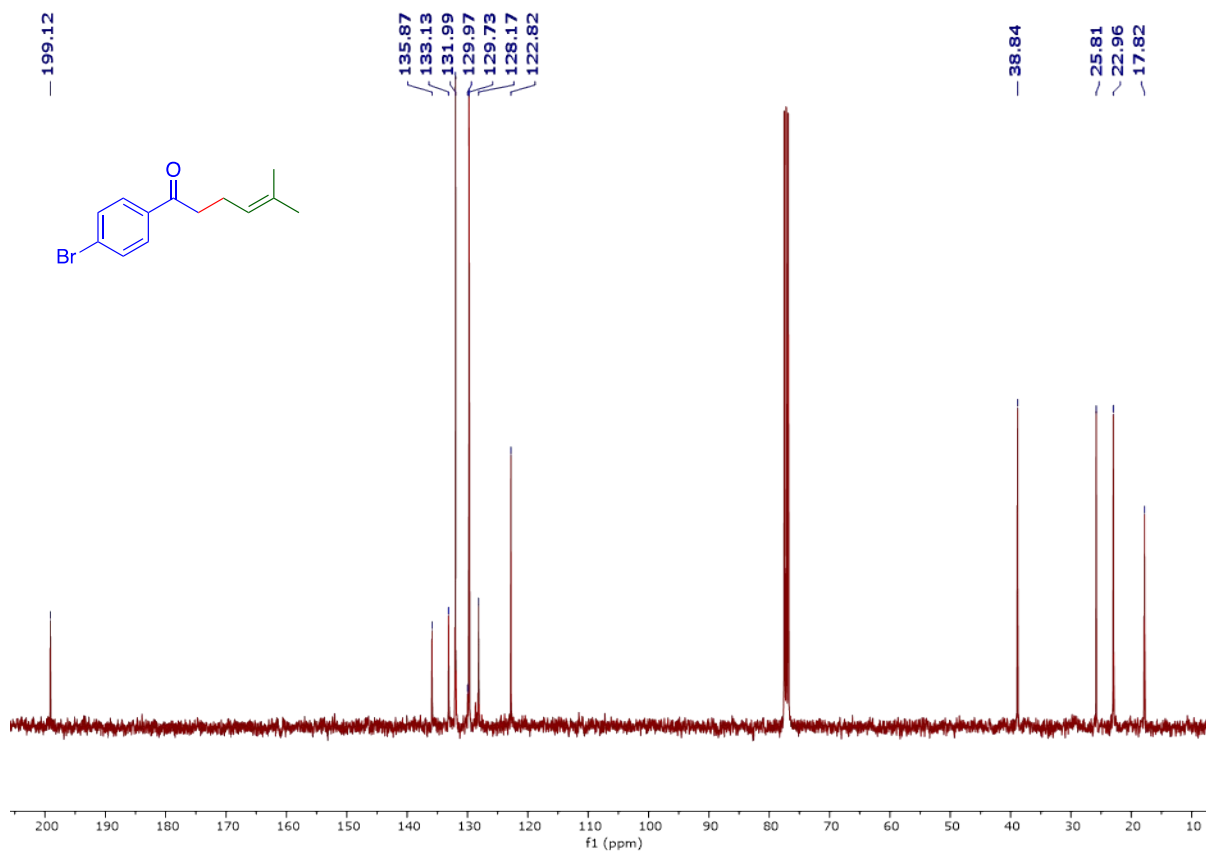

$^1\text{H}$  NMR spectrum of 5-methyl-1-(5-methylfuran-2-yl)hex-4-en-1-one (**3j**, 400 MHz,  $\text{CDCl}_3$ ):

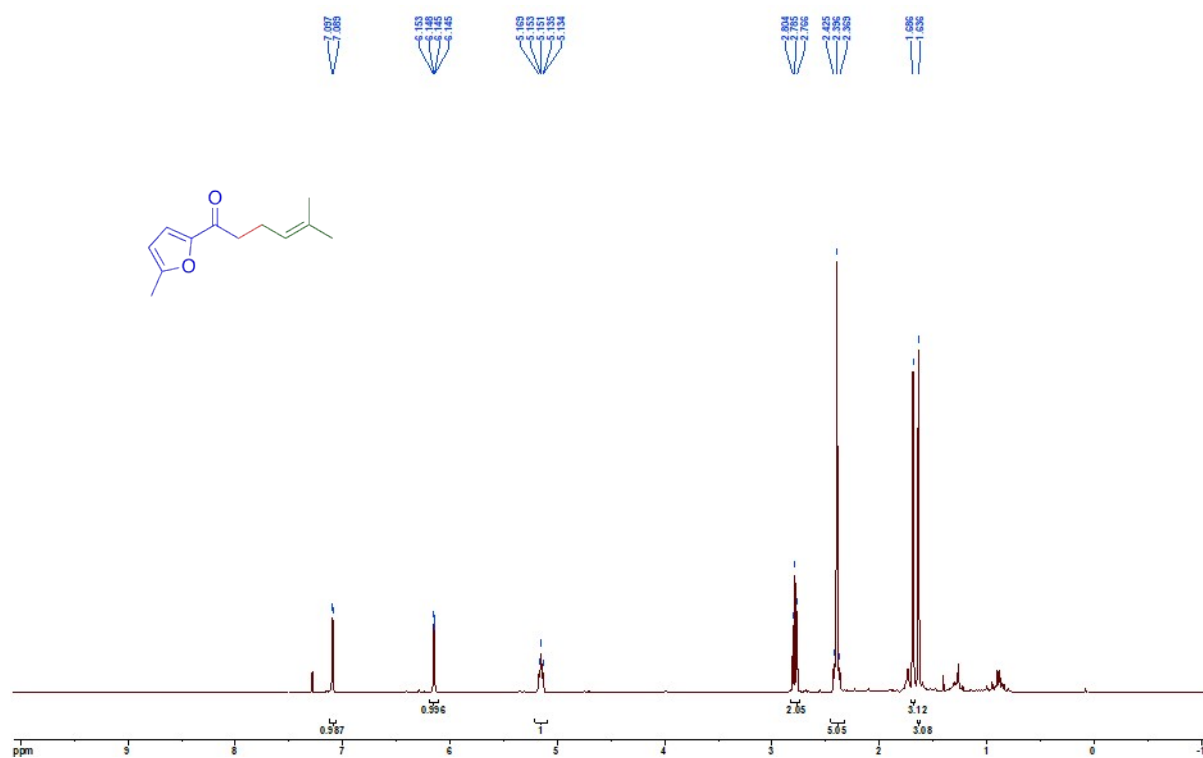

$^{13}\text{C}$  NMR spectrum of 5-methyl-1-(5-methylfuran-2-yl)hex-4-en-1-one (**3j**, 101 MHz,  $\text{CDCl}_3$ ):

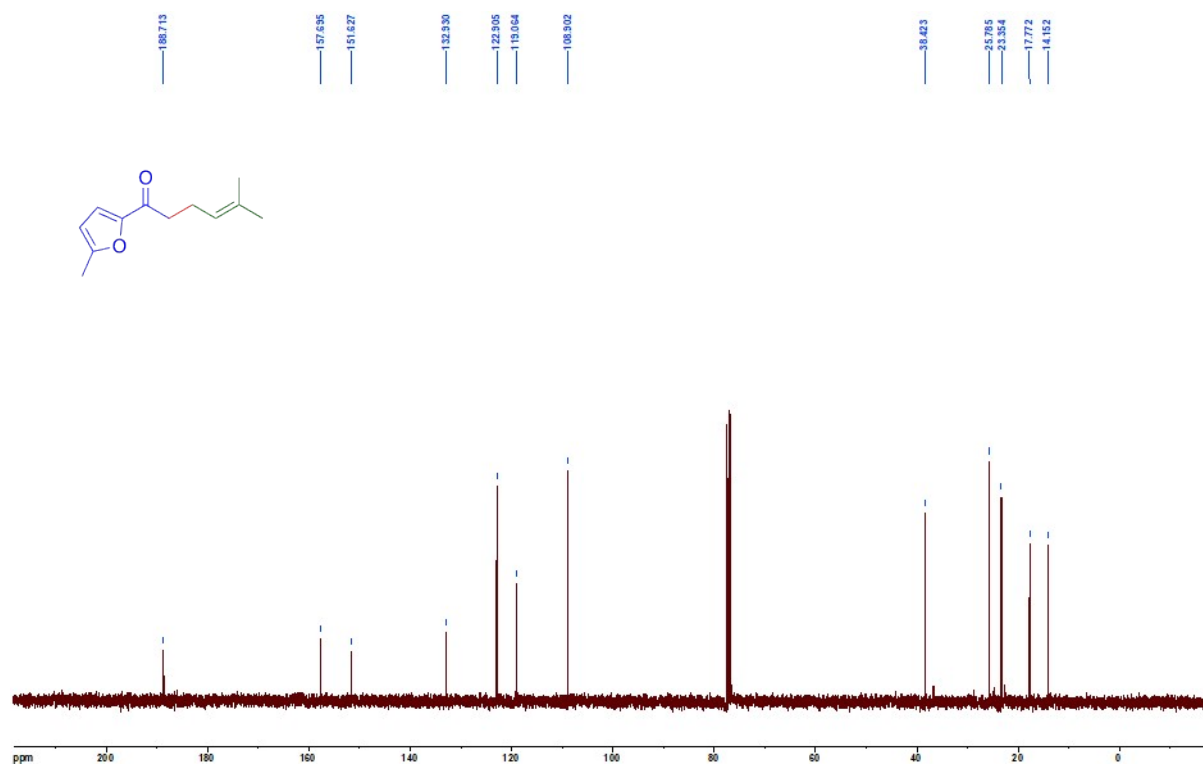

$^1\text{H}$  NMR spectrum of 5-methyl-1-(1-methyl-1H-pyrrol-2-yl)hex-4-en-1-one (**3k**, 400 MHz,  $\text{CDCl}_3$ )  
101 MHz,  $\text{CDCl}_3$ ):

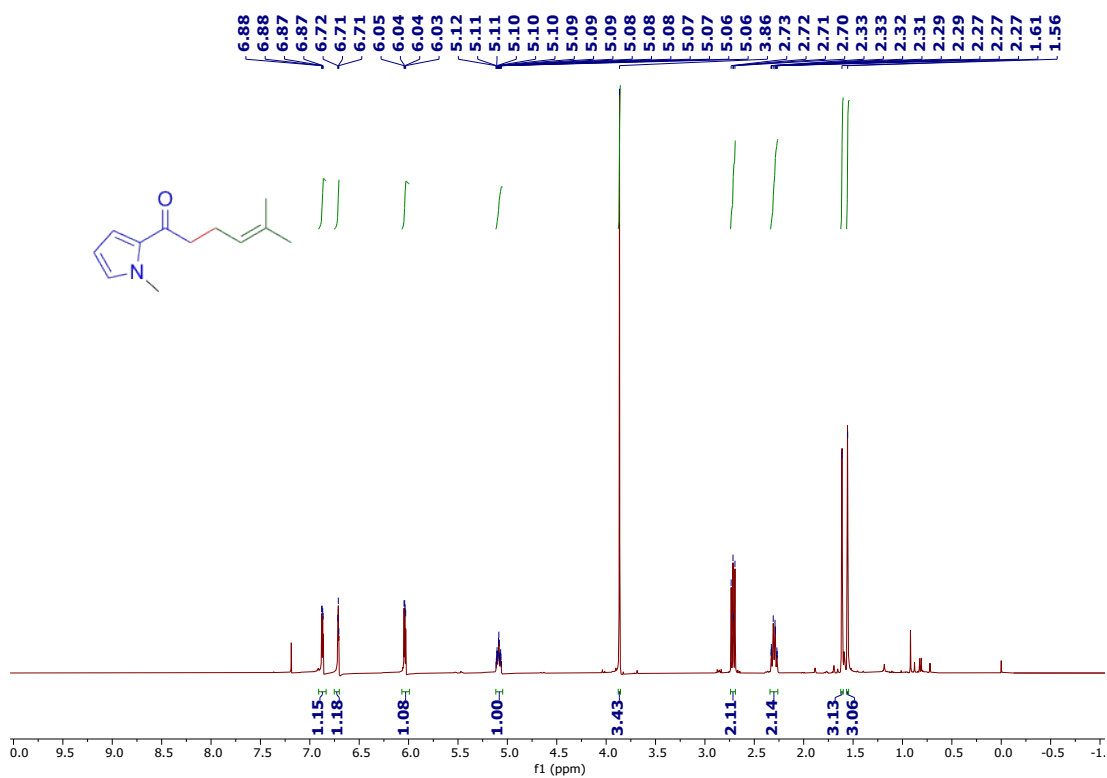

$^{13}\text{C}$  NMR spectrum of 5-methyl-1-(1-methyl-1H-pyrrol-2-yl)hex-4-en-1-one (**3k**, 101 MHz,  $\text{CDCl}_3$ ):

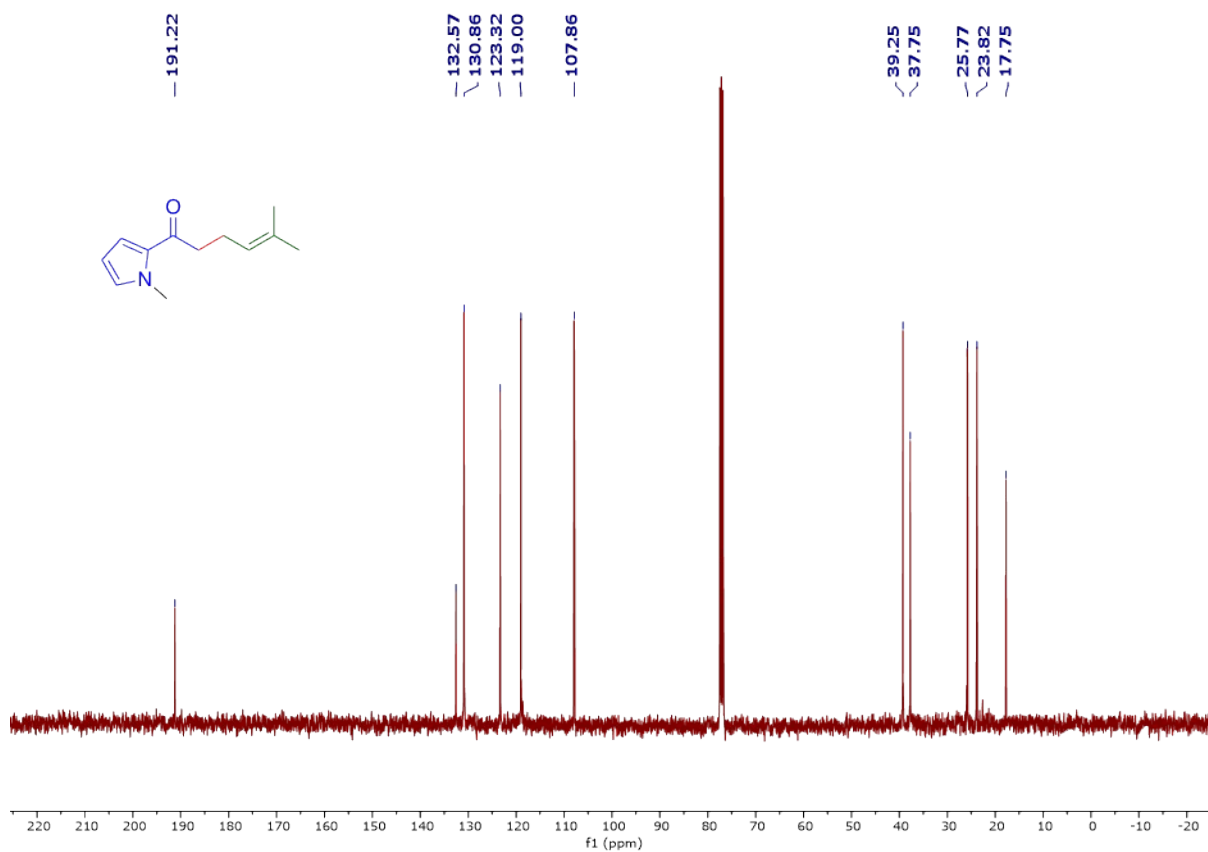

$^1\text{H}$  NMR spectrum of 5-methyl-1-(thiophen-2-yl)hex-4-en-1-one (**31**, 400 MHz,  $\text{CDCl}_3$ ) :

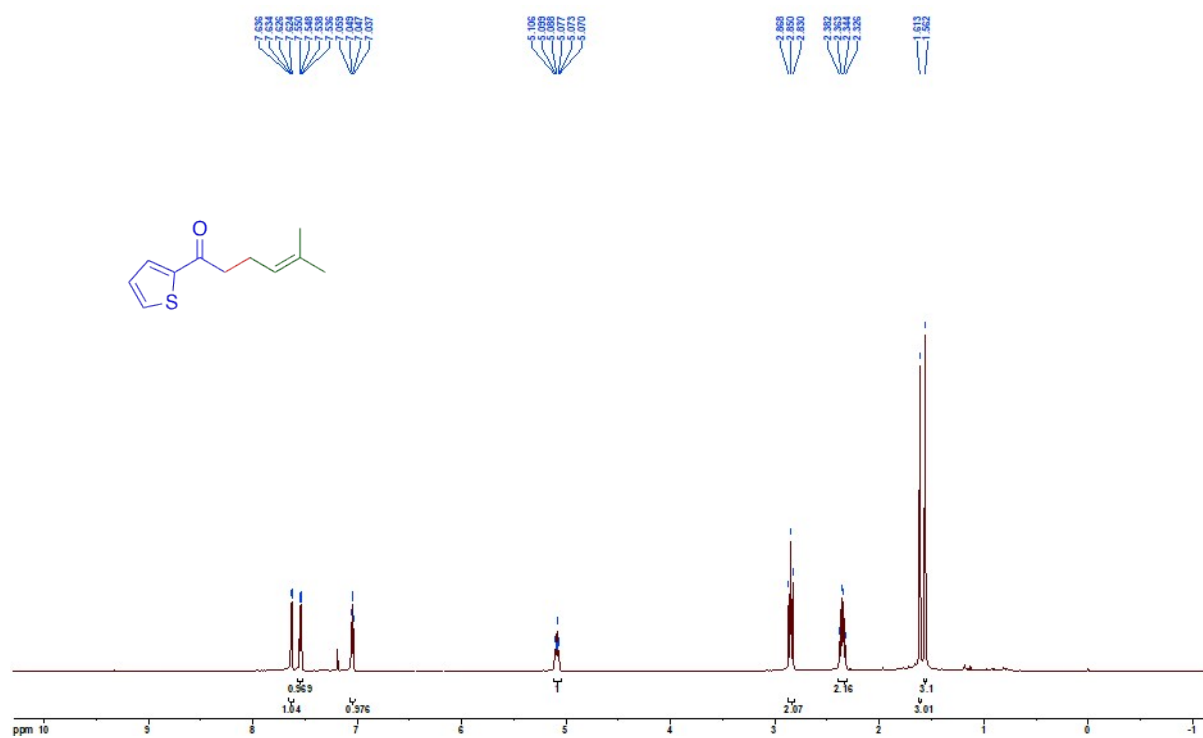

$^{13}\text{C}$  NMR spectrum of 5-methyl-1-(thiophen-2-yl)hex-4-en-1-one (**31**, 101 MHz,  $\text{CDCl}_3$ ):

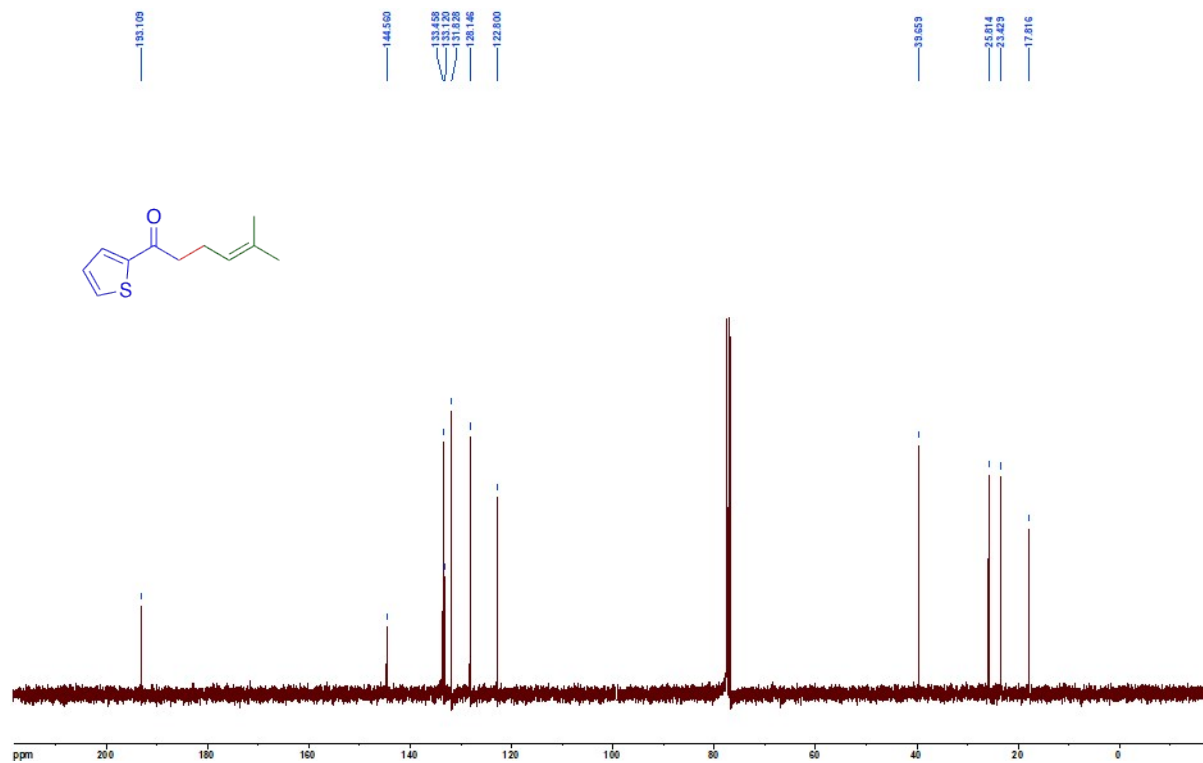

$^1\text{H}$  NMR spectrum of 5-methyl-1-(1-methyl-1H-indol-2-yl)hex-4-en-1-one (**3m**, 400 MHz,  $\text{CDCl}_3$ ):

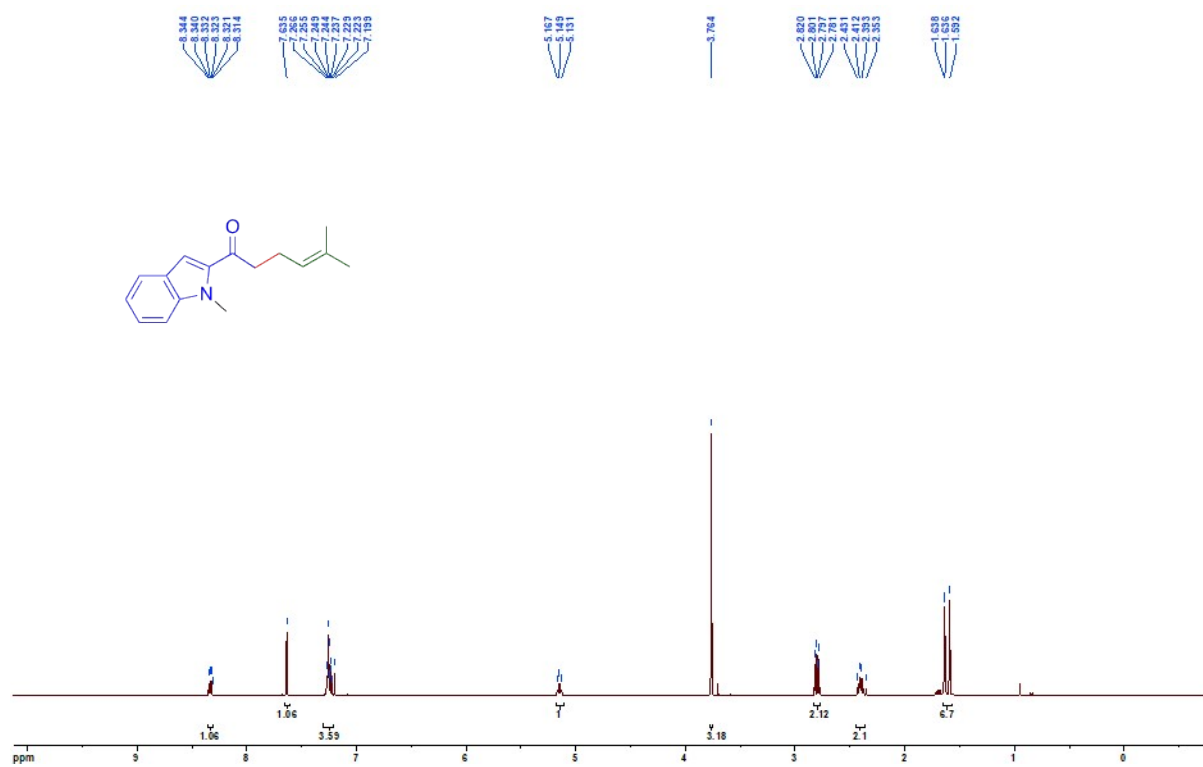

$^{13}\text{C}$  NMR spectrum of 5-methyl-1-(1-methyl-1H-indol-2-yl)hex-4-en-1-one (**3m**, 101 MHz,  $\text{CDCl}_3$ ):

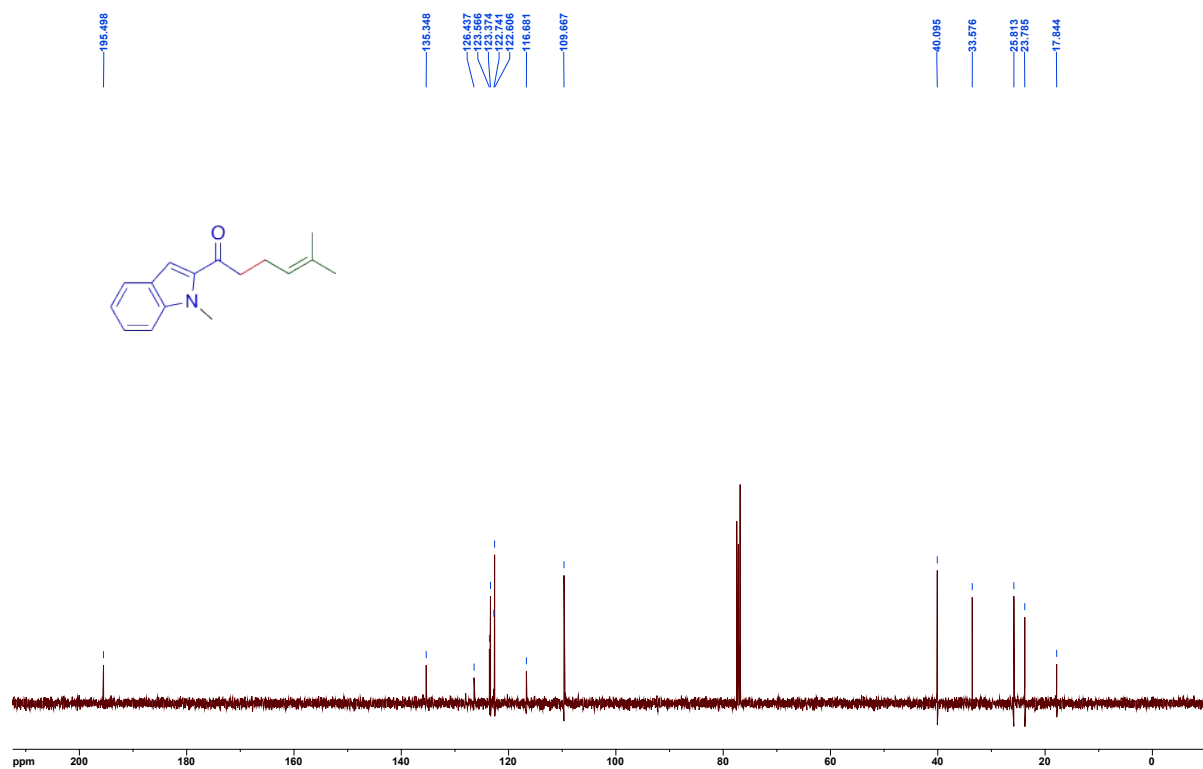

$^1\text{H}$  NMR spectrum of 5-methyl-1-(pyridin-3-yl)hex-4-en-1-one (**3n**, 400 MHz,  $\text{CDCl}_3$ ) :

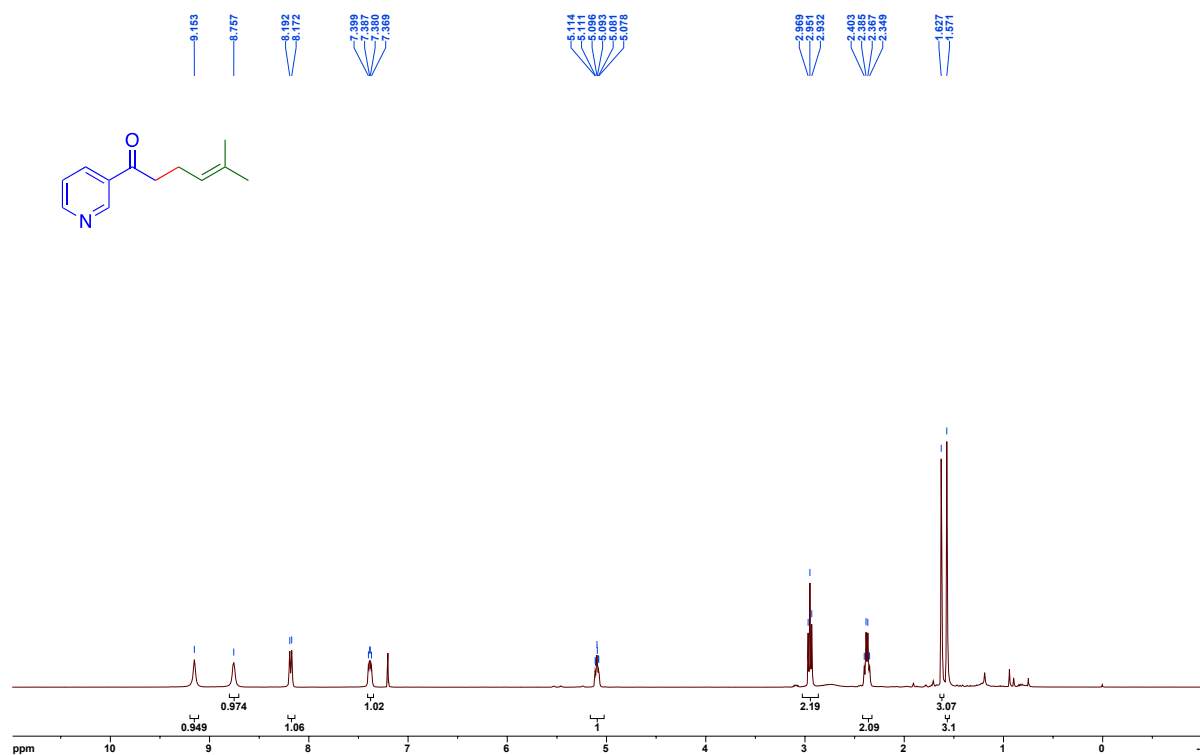

$^{13}\text{C}$  NMR spectrum of 5-methyl-1-(pyridin-3-yl)hex-4-en-1-one (**3n**, 101 MHz,  $\text{CDCl}_3$ ):

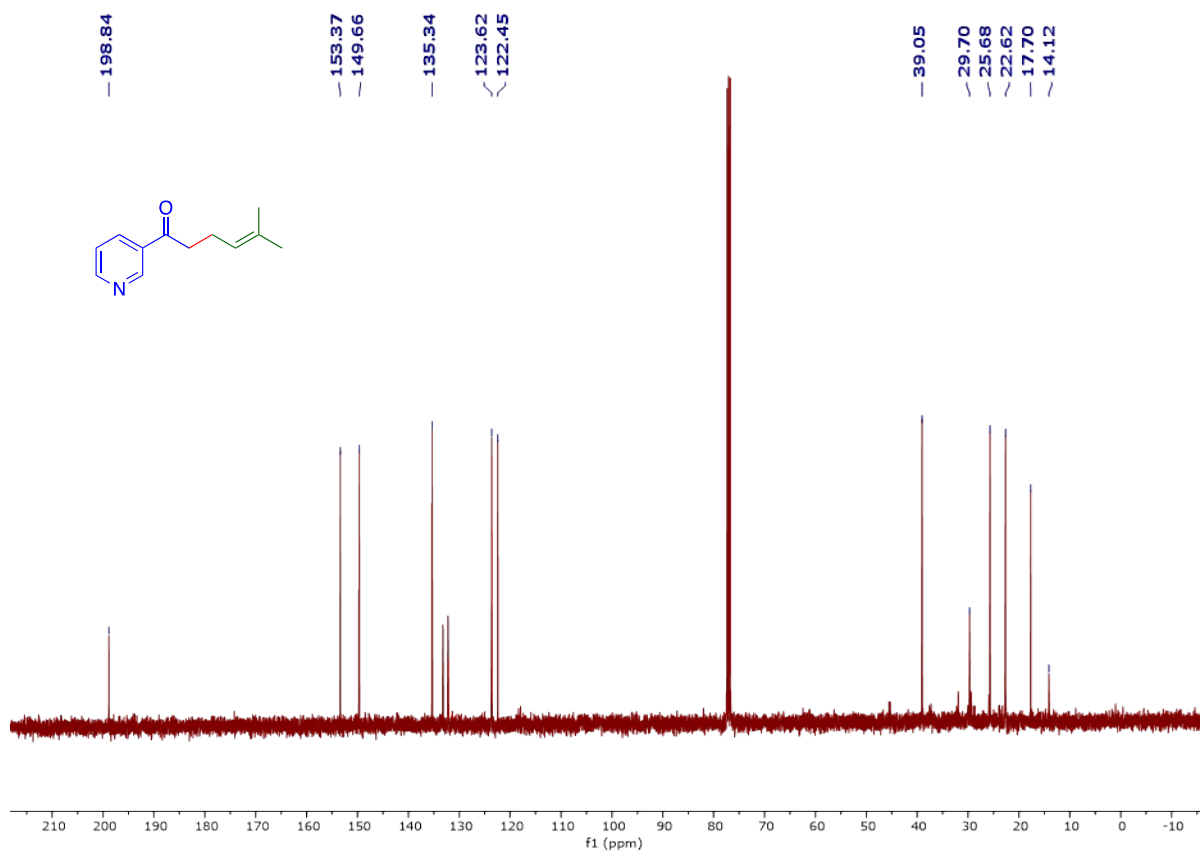

$^1\text{H}$  NMR spectrum of 5-methyl-1-(quinolin-3-yl)hex-4-en-1-one (**30**, 400 MHz,  $\text{CDCl}_3$ ) :

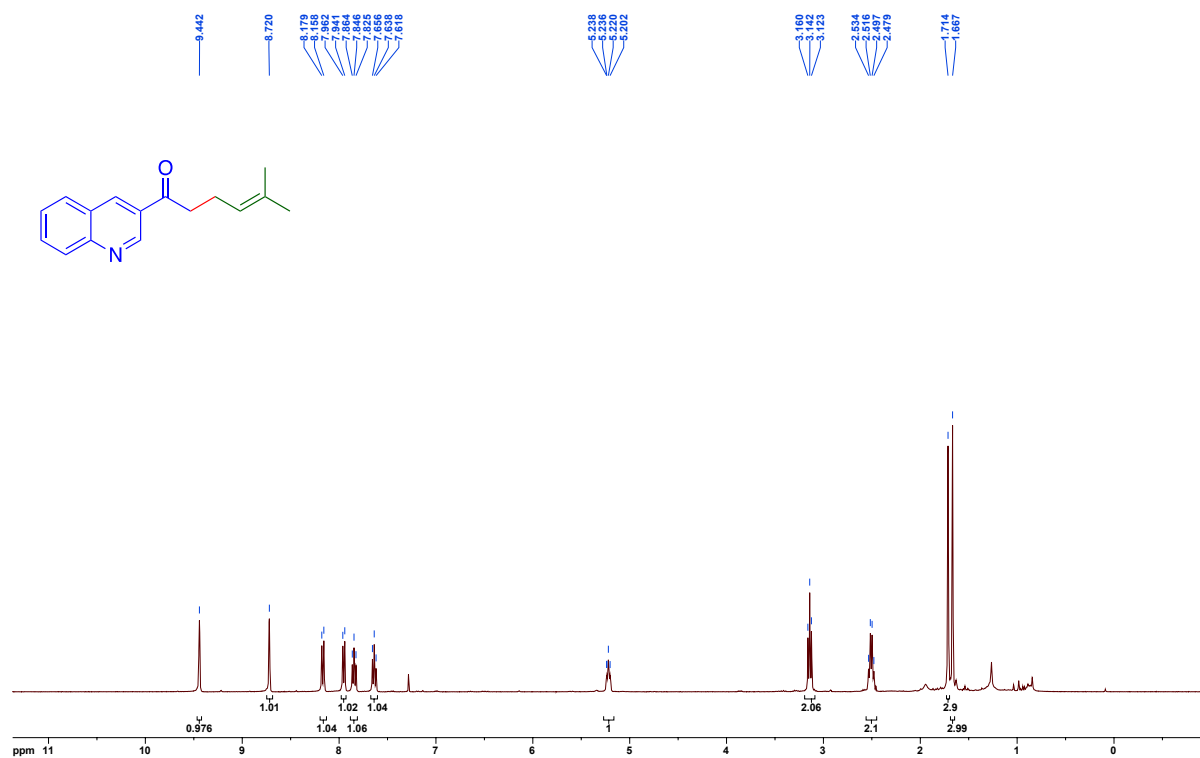

$^{13}\text{C}$  NMR spectrum of 5-methyl-1-(quinolin-3-yl)hex-4-en-1-one (**30**, 101 MHz,  $\text{CDCl}_3$ ):

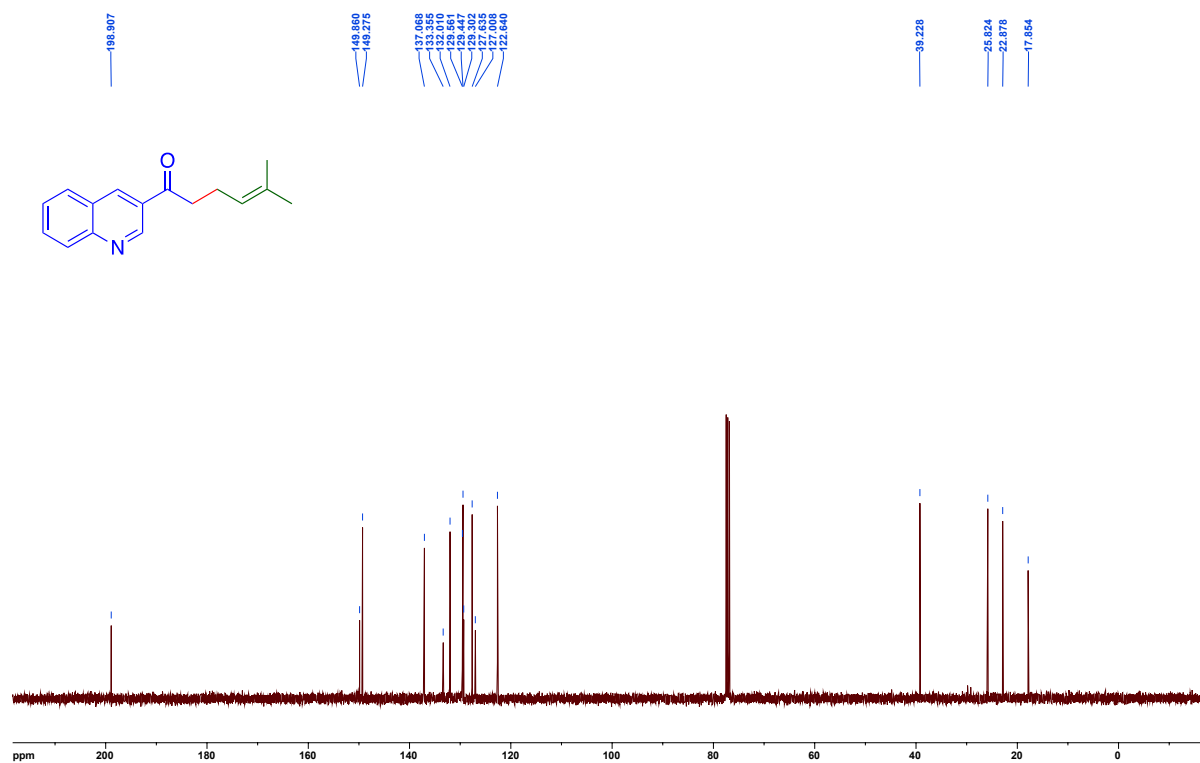

$^1\text{H}$  NMR spectrum of 5-methyl-1-(naphthalen-2-yl)hex-4-en-1-one (**3p**, 400 MHz,  $\text{CDCl}_3$ ) 101 MHz,  $\text{CDCl}_3$ ):

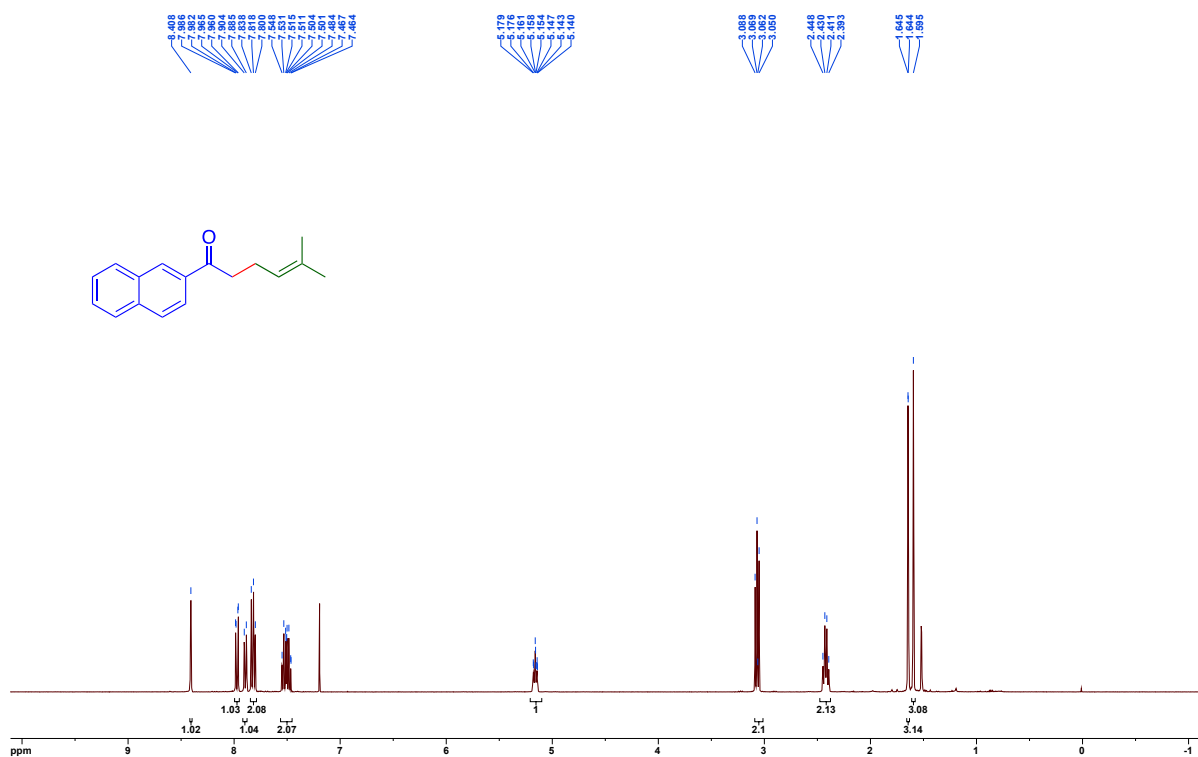

$^{13}\text{C}$  NMR spectrum of 5-methyl-1-(naphthalen-2-yl)hex-4-en-1-one (**3p**, 101 MHz,  $\text{CDCl}_3$ ):

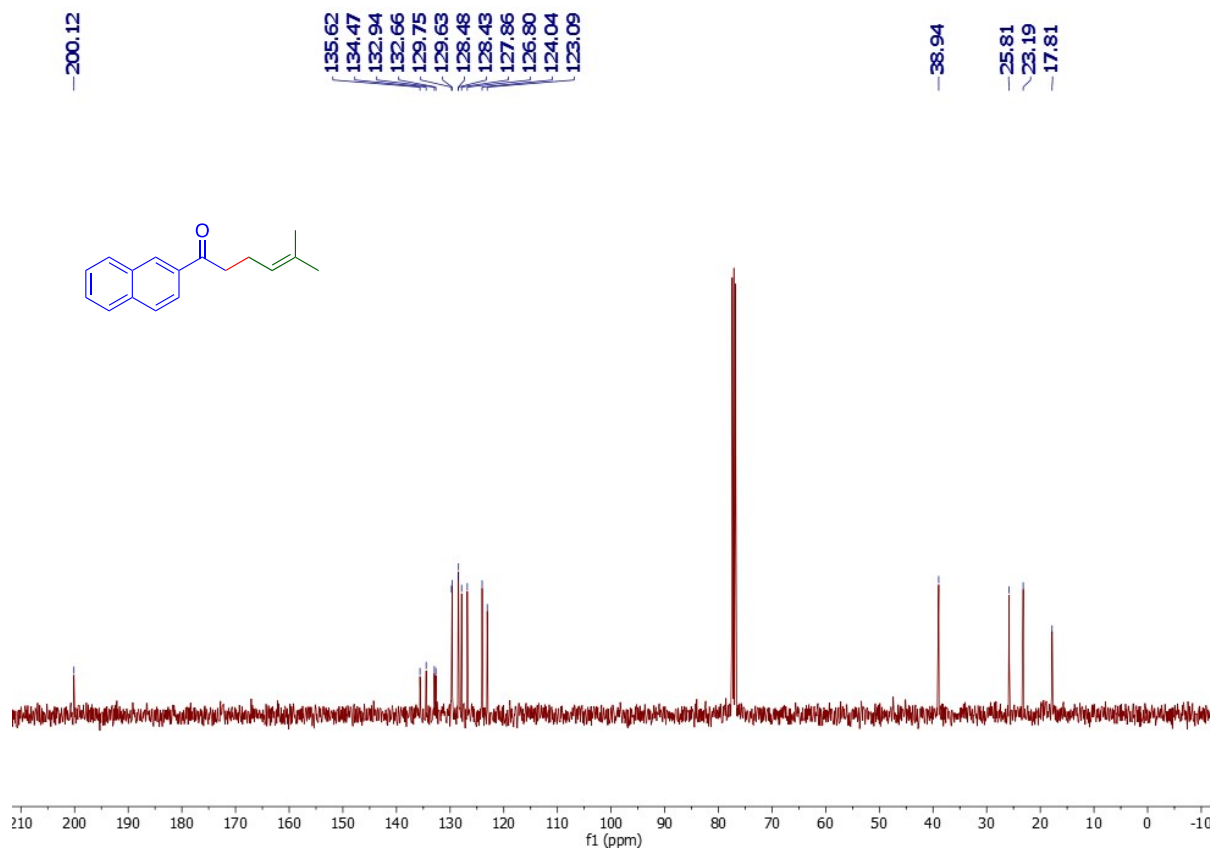



$^1\text{H}$  NMR spectrum of 1-(4a,10-dihydroanthracen-9-yl)-5-methylhex-4-en-1-one (**3q**, 400 MHz,  $\text{CDCl}_3$ ):

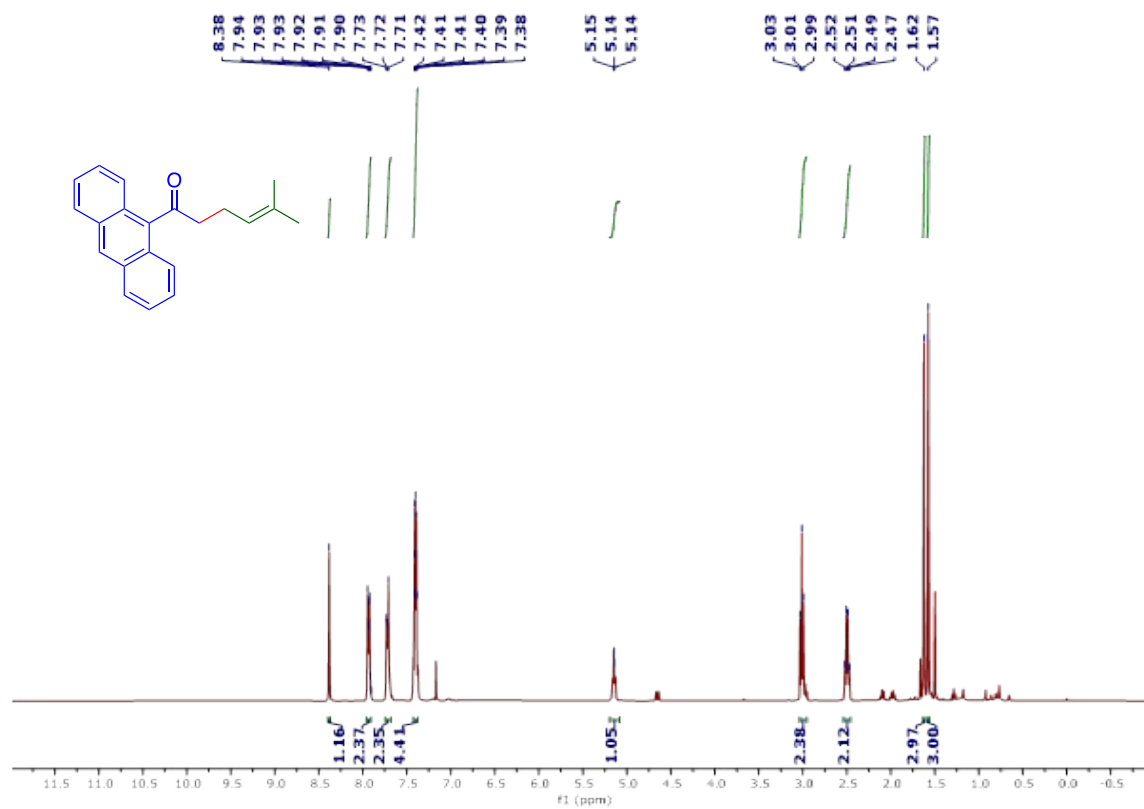

$^{13}\text{C}$  NMR spectrum of 1-(4a,10-dihydroanthracen-9-yl)-5-methylhex-4-en-1-one (**3q**, 101 MHz,  $\text{CDCl}_3$ ):

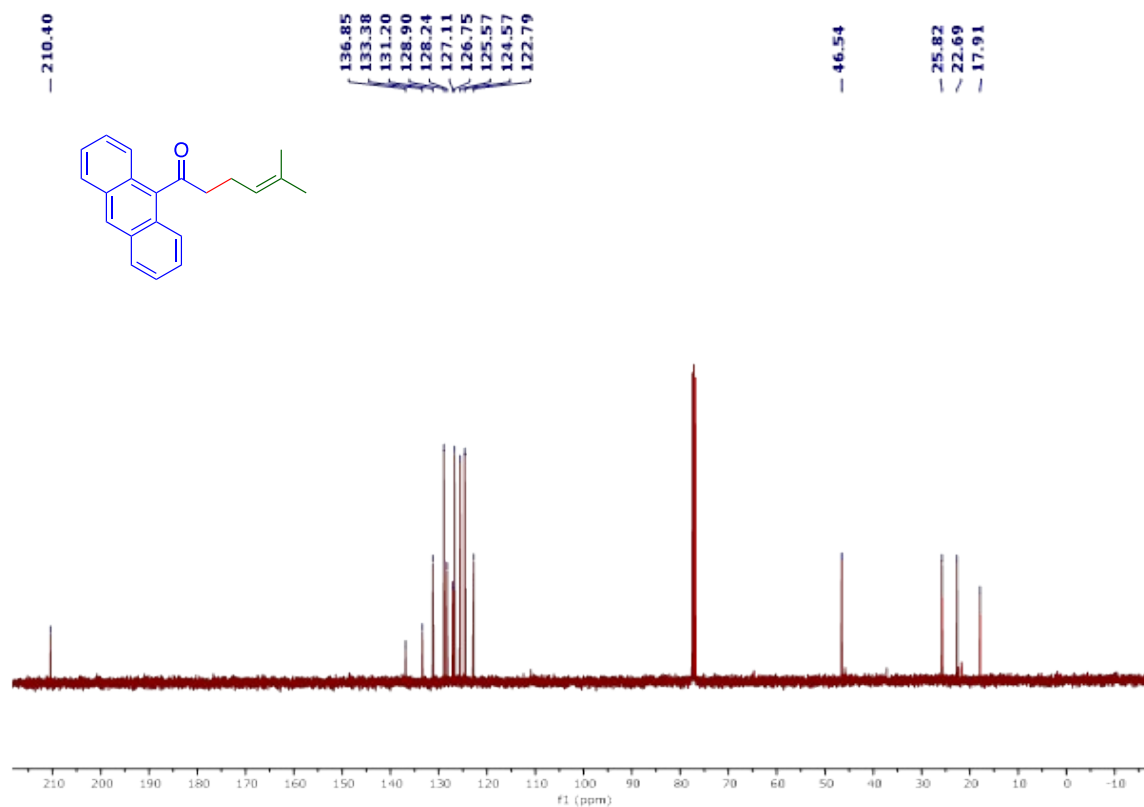

$^1\text{H}$  NMR spectrum of (*E*)-5,9-Dimethyl-1-phenyldeca-4,8-dien-1-one (**3r**, 400 MHz,  $\text{CDCl}_3$ ) :

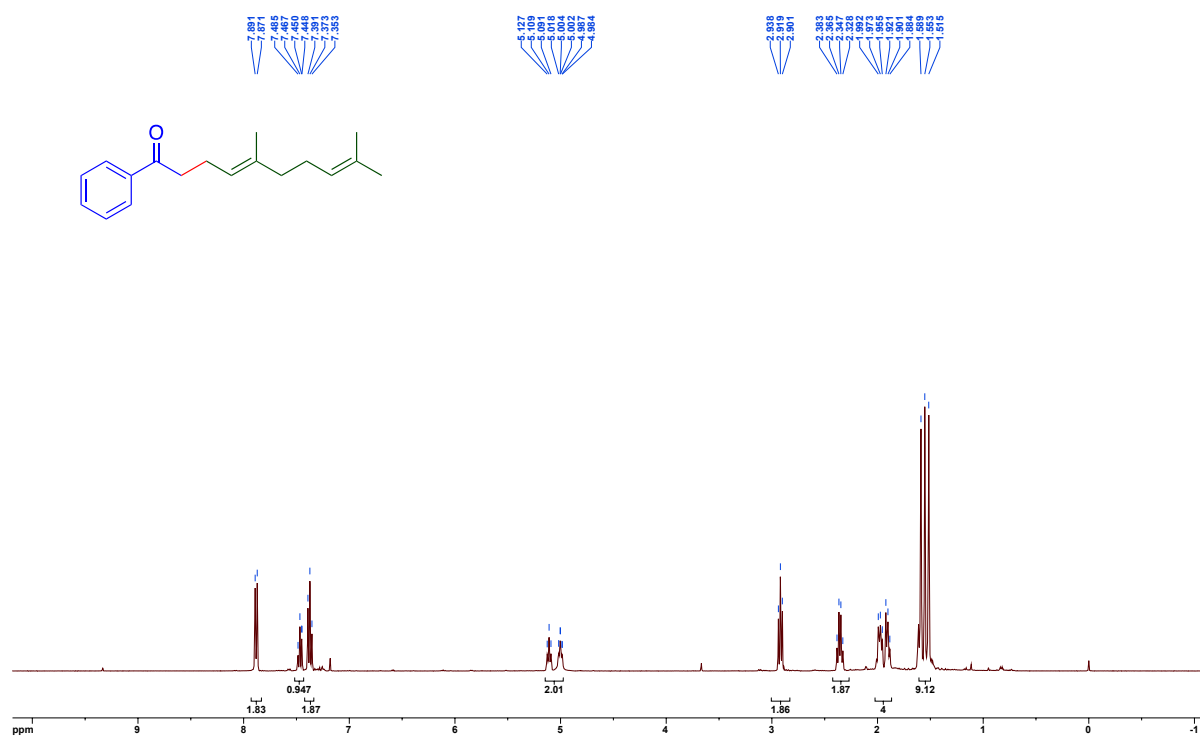

$^{13}\text{C}$  NMR spectrum of (*E*)-5,9-Dimethyl-1-phenyldeca-4,8-dien-1-one (**3r**, 101 MHz,  $\text{CDCl}_3$ ):

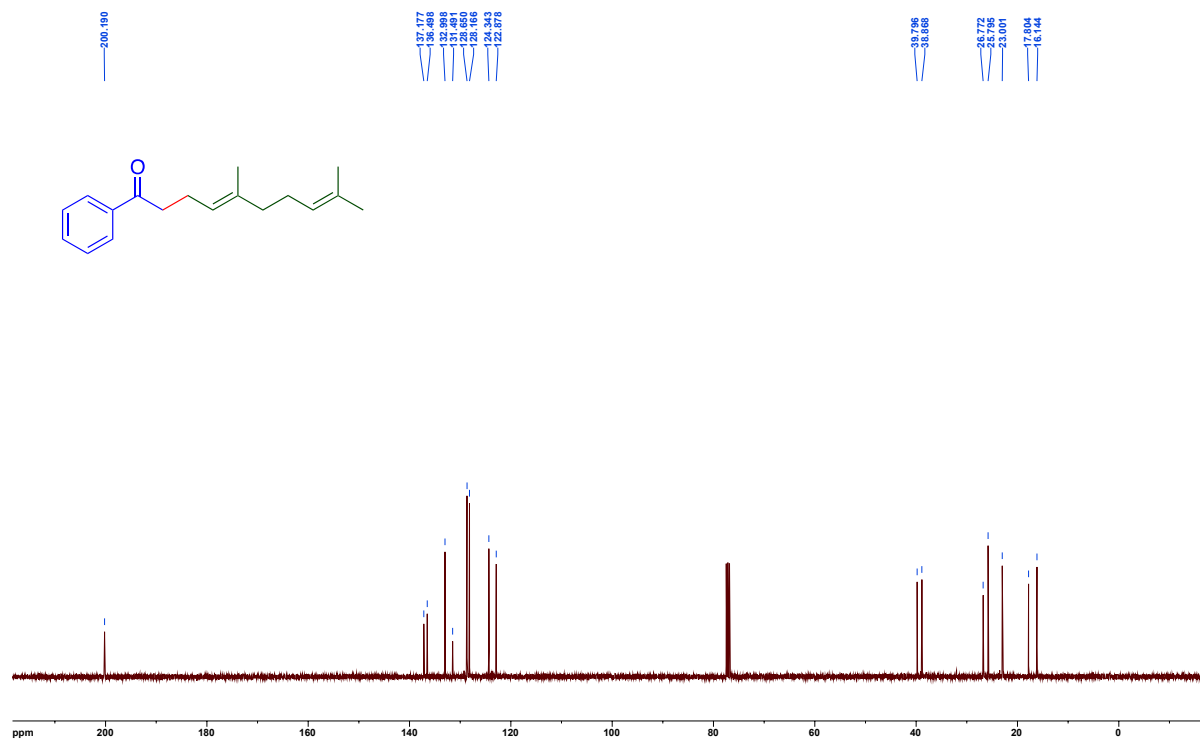

# <sup>1</sup>H & <sup>13</sup>C spectra of Functionalized Compounds Prepared from α-Prenylated Ketones:

<sup>1</sup>H NMR spectrum of 5-methyl-1-phenylhex-4-en-1-ol (**4a**, 400 MHz, CDCl<sub>3</sub>):

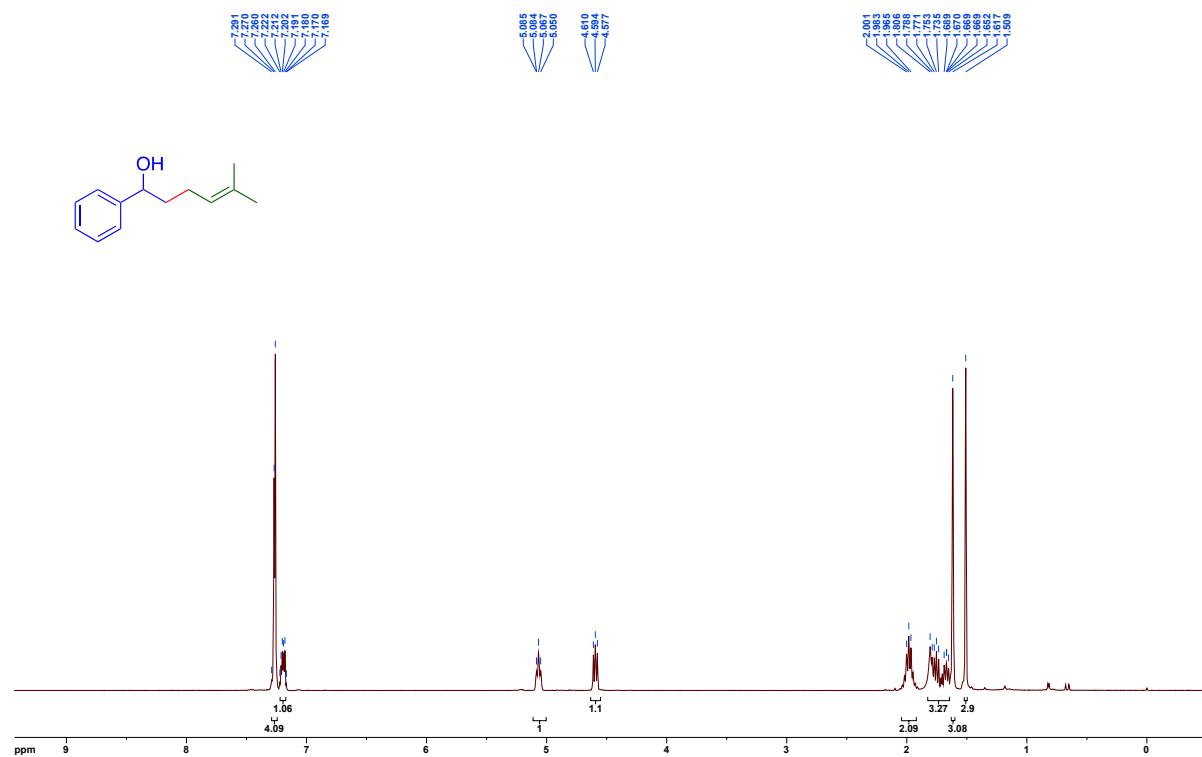

<sup>13</sup>C NMR spectrum of 5-methyl-1-phenylhex-4-en-1-ol (**4a**, 101 MHz, CDCl<sub>3</sub>):

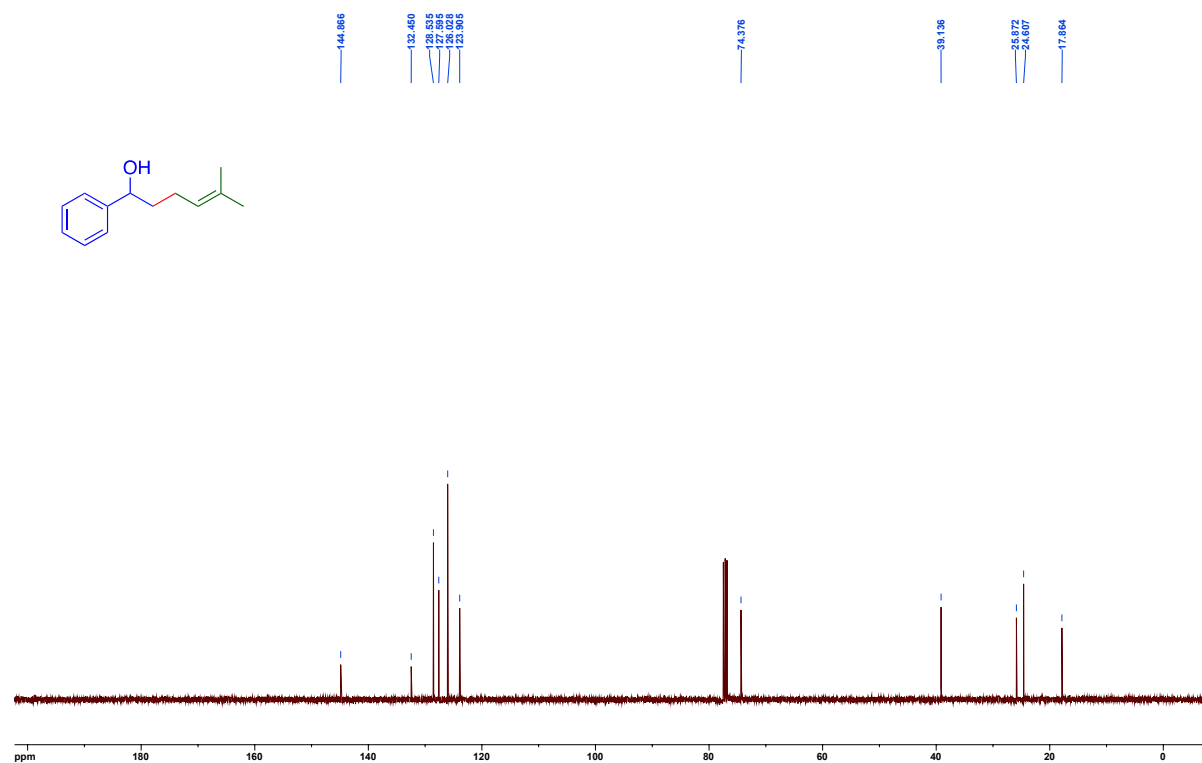

$^1\text{H}$  NMR spectrum of 3,5-dibromo-2,2-dimethyl-6-phenyl-3,4-dihydro-2H-pyran (**4b**, 400 MHz,  $\text{CDCl}_3$ ):

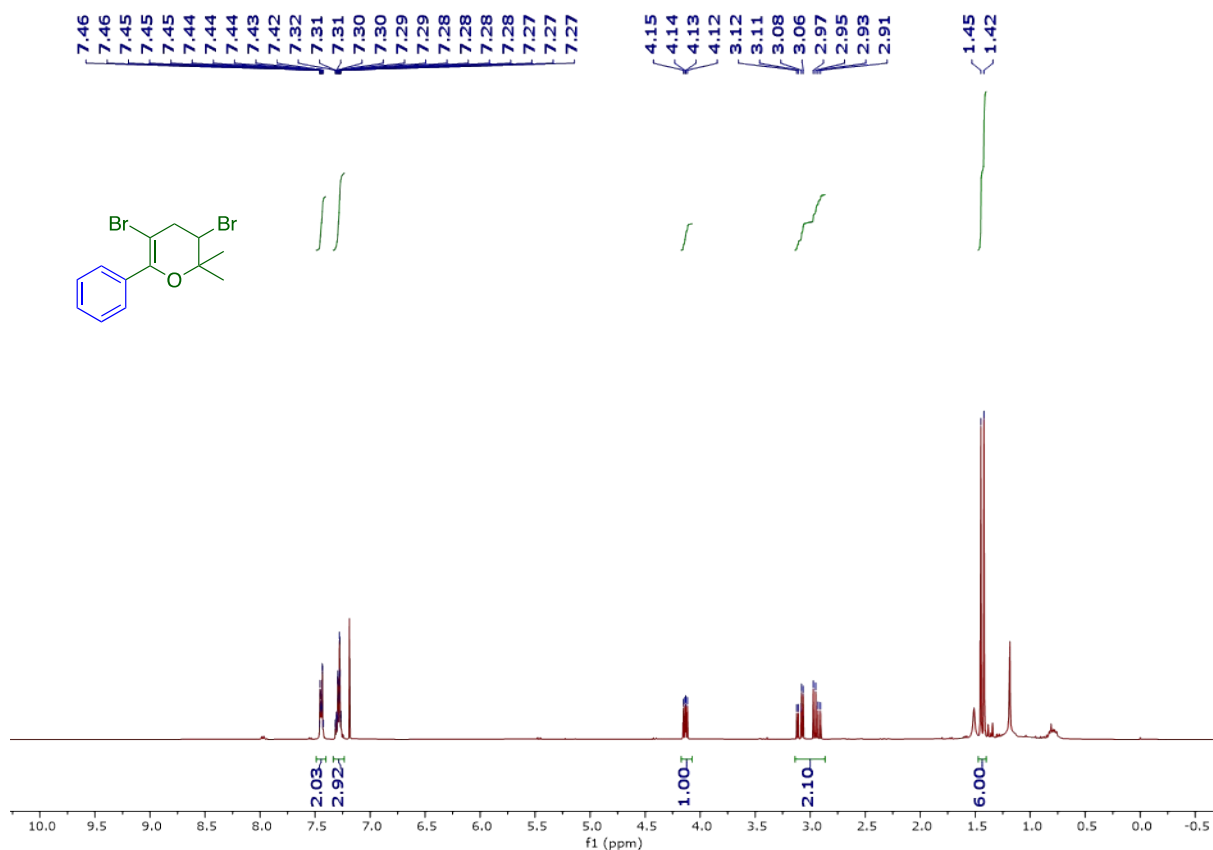

$^{13}\text{C}$  NMR spectrum of 3,5-dibromo-2,2-dimethyl-6-phenyl-3,4-dihydro-2H-pyran (**4b**):

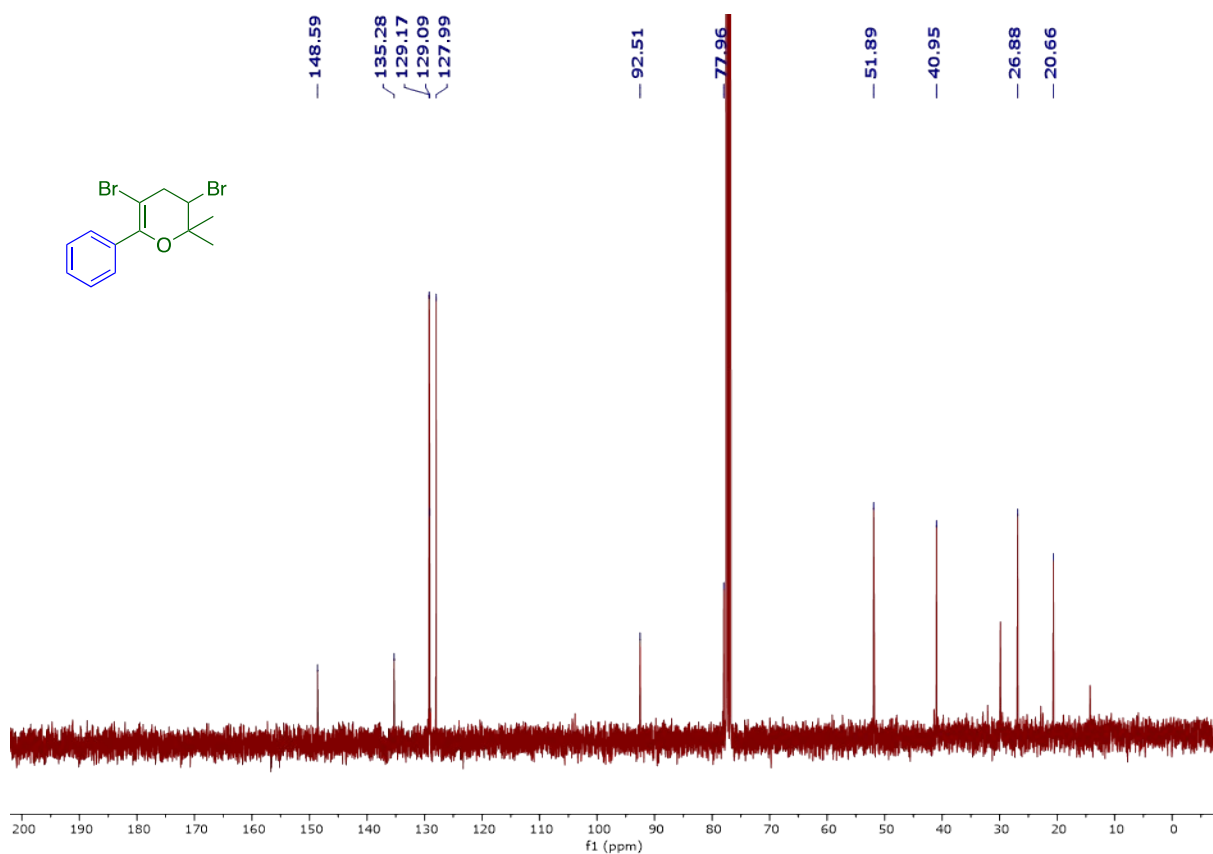



$^1\text{H}$  NMR spectrum of (*E*)-1-(4-methoxyphenyl)-5-methylhex-4-en-1-one oxime (**4e**, 400 MHz,  $\text{CDCl}_3$ ):

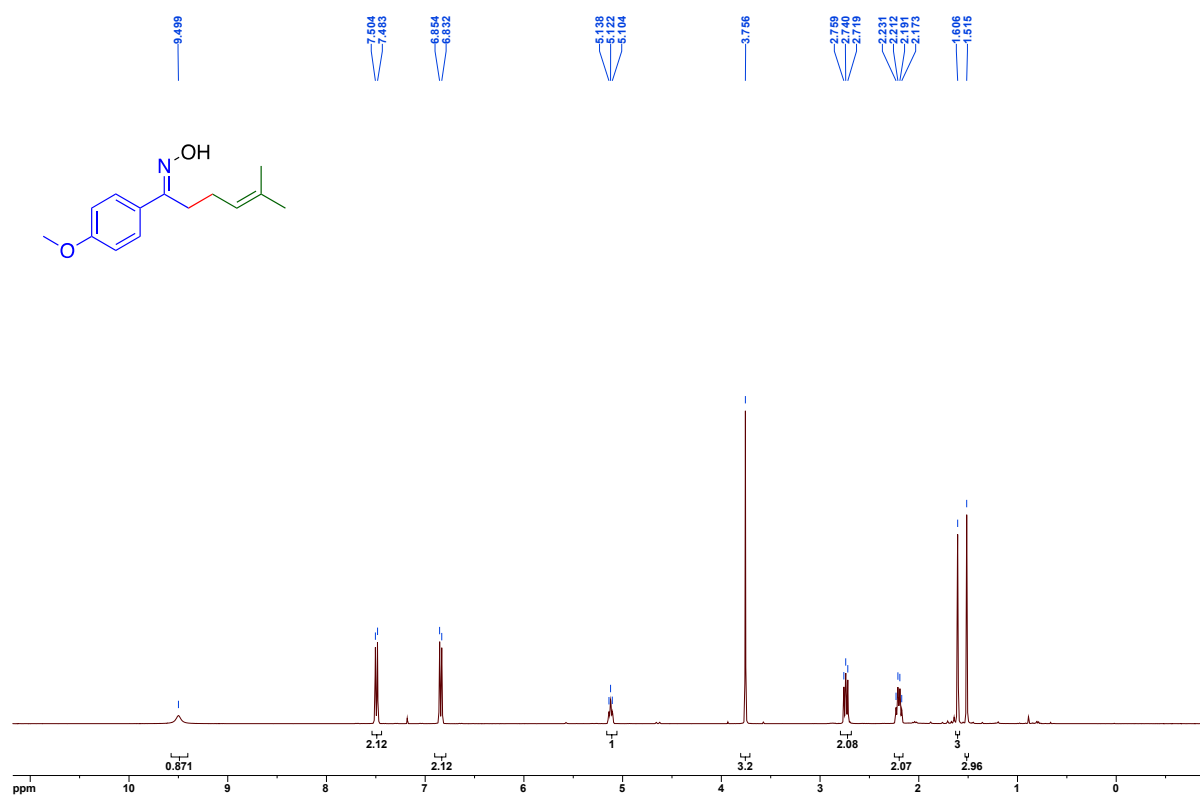

$^{13}\text{C}$  NMR spectrum of (*E*)-1-(4-methoxyphenyl)-5-methylhex-4-en-1-one oxime (**4e**, 101 MHz,  $\text{CDCl}_3$ ):

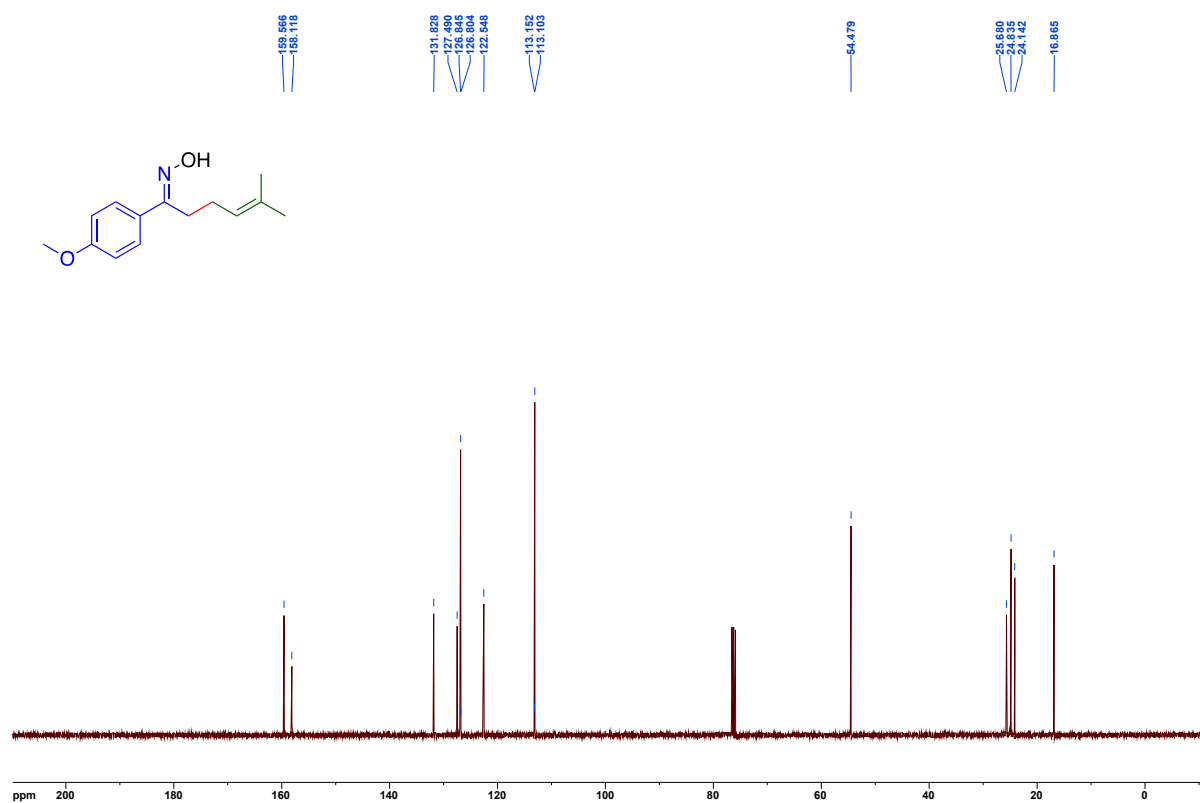

## References:

- 1) Narender, T.; Sarkar, S.; Rajendar, K.; Tiwari, S. Synthesis of Biaryls via AlCl<sub>3</sub> Catalyzed Domino Reaction Involving Cyclization, Dehydration, and Oxidation. *Org. Lett.* **2011**, *13*, 6140-6143.
- 2) Antonioletti, R.; Magnanti, S.; Scettri, A. Br<sup>+</sup>-Induced Cyclization of  $\gamma,\delta$ -Unsaturated Ketones: Anew Approach to Bromopyrane Derivatives. *Tetrahedron. Lett.* **1994**, *35*, 2619-2620.
- 3) Dechoux, L.; Ebel, M.; Jung, L.; Stambach, J, F. A Simple One-Pot Preparation Of (Z)-Cyclopropanes from  $\gamma,\delta$ -Ketoalkenes using KOH/DMSO Intramolecular Alkylation Conditions. *Tetrahedron. Lett.* **1993**, *34*, 7405-7408.
- 4) Chen, F.; Yang, X. L.; Wu, Z. W.; Han, B. Synthesis of Isoxazoline/Cyclic Nitron-Featured Methylens Using Unsaturated Ketoximes: A Dual Role of TEMPO. *J. Org. Chem.* **2016**, *81*, 3042-3050.
